# Supplementary material
Source: HighWire-hosted journal article supplement (https://www.cmaj.ca/highwire/filestream/81430/field_highwire_adjunct_files/1/211416-res-2-at.pdf)
Supplement: 211416-res-2-at.pdf [file 211416-res-2-at.pdf]

## Appendix 2: Articles Excluded at Full Text Screening

### Full Text Studies or Reports Excluded with Reasons (n= 756)

| Full-text exclusion reason                            | Number of excluded full-text studies or sources | Explanation of reason                                                                                                                                        |
|-------------------------------------------------------|-------------------------------------------------|--------------------------------------------------------------------------------------------------------------------------------------------------------------|
| Wrong study design                                    | 70                                              | The study/report does not include <b>results of a completed study</b> (e.g., editorial, commentary, literature review, study protocol or systematic review). |
| Wrong setting                                         | 85                                              | The study/report does not take place in a <b>Canadian health care setting</b> .                                                                              |
| Wrong sample                                          | 68                                              | The study/report does not include results from <b>large or diverse populations or multiple centers</b> .                                                     |
| Wrong timeframe                                       | 140                                             | The study/report does not include <b>data from the last 13 years (2007-2020)</b> .                                                                           |
| Wrong measurement                                     | 41                                              | The study/report does not include <b>quantitative measurement</b> .                                                                                          |
| Does not measure appropriate/inappropriate healthcare | 343                                             | The study/report does not include <b>inappropriate or appropriate health care</b> (of which inappropriate health care can be derived).                       |
| Cannot find                                           | 9                                               | Not able to locate full-text.                                                                                                                                |
| <b>Total</b>                                          | <b>756</b>                                      |                                                                                                                                                              |

### Wrong study design (n= 70)

| No. | First Author | Year | Full Citation or Source                                                                                                                                                         |
|-----|--------------|------|---------------------------------------------------------------------------------------------------------------------------------------------------------------------------------|
| 1.  | Anderson     | 2012 | Anderson K, Daly M. Making useful links between innercity and remote physicians. Canadian Journal of Rural Medicine. 2012 Jan 1;17(1):30-2.                                     |
| 2.  | Anthonisen   | 2009 | Anthonisen N. Efficient management of cough. Can Respir J. 2009 16(2): 41-2.                                                                                                    |
| 3.  | Arkin        | 2011 | Arkin E, Symington A. Ontario: study documents access and quality of care issues for women living with or vulnerable to HIV. HIV/AIDS Policy & Law Review. 2011 Oct;15(3):27-8. |
| 4.  | Baker        | 2012 | Baker GR. The challenges of making care safer: leadership and system transformation. Healthc Q. 2012 Apr;15:8-11.                                                               |

| No. | First Author                              | Year | Full Citation or Source                                                                                                                                                                                                                                                                                                          |
|-----|-------------------------------------------|------|----------------------------------------------------------------------------------------------------------------------------------------------------------------------------------------------------------------------------------------------------------------------------------------------------------------------------------|
| 5.  | Barata                                    | 2015 | Barata I, Brown KM, Fitzmaurice L, Griffin ES, Snow SK, American Academy of Pediatrics Committee on Pediatric Emergency Medicine, Emergency Nurses Association Pediatric Committee. Best practices for improving flow and care of pediatric patients in the emergency department. <i>Pediatrics</i> . 2015 Jan 1;135(1):e273-83. |
| 6.  | Bell                                      | 2017 | Bell NR, Grad R, Dickinson JA, Singh H, Moore AE, Kasperavicius D, et al. Better decision making in preventive health screening: balancing benefits and harms. <i>Canadian Family Physician</i> . 2017 Jul 1;63(7):521-4.                                                                                                        |
| 7.  | Bermúdez-Tamayo                           | 2014 | Bermúdez-Tamayo C, Johri M, Perez-Ramos FJ, Maroto-Navarro G, Caño-Aguilar A, Garcia-Mochon L, et al. Evaluation of quality improvement for cesarean sections programmes through mixed methods. <i>Implementation Science</i> . 2014 Dec;9(1):182.                                                                               |
| 8.  | Borgaonkar                                | 2013 | Borgaonkar MR. A blueprint for quality. <i>Can J Gastroenterol</i> . 2013;27(2):73.                                                                                                                                                                                                                                              |
| 9.  | Burbidge                                  | 2017 | Burbidge T, Davidson W, Robertson L. Dermoscopy use by Canadian dermatologists and dermatology residents: a cross-sectional nationwide study. <i>British Journal of Dermatology</i> . 2017 Nov;177(5):e213-4.                                                                                                                    |
| 10. | Cairns                                    | 2014 | Cairns BE, Kolta A, Whitney E, Craig K, Rei N, Lam DK, et al. The use of opioid analgesics in the management of acute and chronic orofacial pain in Canada: the need for further research. <i>J Can Dent Assoc</i> . 2014;80:e49.                                                                                                |
| 11. | Campbell                                  | 2017 | Campbell DS. Choosing Wisely Canada recommendations. <i>Canadian Family Physician</i> . 2017 Jul 1;63(7):541.                                                                                                                                                                                                                    |
| 12. | Canadian Institute for Health Information | 2014 | Canadian Institute for Health Information. Sources of potentially avoidable emergency department visits. Canadian Institute for Health Information; 2014.                                                                                                                                                                        |
| 13. | Chapman                                   | 2019 | Chapman S. KNOWLEDGE AND ADHERENCE TO COG SURVIVORSHIP GUIDELINES IN SURVIVORS OF CHILDHOOD CANCER IN MANITOBA. In <i>PEDIATRIC BLOOD &amp; CANCER</i> 2019 Jun 1 (Vol. 66). 111 RIVER ST, HOBOKEN 07030-5774, NJ USA: WILEY.                                                                                                    |
| 14. | Chen                                      | 2008 | Chen J, Normand SL. Myocardial infarction and quality of care. <i>CMAJ</i> . 2008 179(9):875-6.                                                                                                                                                                                                                                  |
| 15. | Clutter                                   | 2009 | Clutter PC. Clinical practice guidelines: key resources to guide clinical decision making and enhance quality health care. <i>Journal of Emergency Nursing</i> . 2009 Sep 1;35(5):460-1.                                                                                                                                         |

| No. | First Author | Year | Full Citation or Source                                                                                                                                                                                                                                                    |
|-----|--------------|------|----------------------------------------------------------------------------------------------------------------------------------------------------------------------------------------------------------------------------------------------------------------------------|
| 16. | Collier      | 2010 | Collier R. Accountability key for patient charter. <i>CMAJ</i> . April 06, 2010 182 (6) E264.                                                                                                                                                                              |
| 17. | Courtney     | 2019 | Courtney D, Bennett K, Henderson J, Darnay K, Battaglia M, Strauss J, et al. A way through the woods: development of an integrated care pathway for adolescents with depression. <i>Early Intervention in Psychiatry</i> . 2019;14(4):486–494.                             |
| 18. | Crossland    | 2019 | Crossland D, Van De Bruaene A, Silversides C, Hickey E, Roche S. Heart failure in adult congenital heart disease: from advanced therapies to end-of-life care. <i>Canadian Journal of Cardiology</i> . 2019;35(12):1723-1739.                                              |
| 19. | Cybulski     | 2011 | Cybulski P. A critical care nurse's role in the provision of end-of-life care. <i>Dynamics (Pembroke, Ont.)</i> 2011;22(4):7-8.                                                                                                                                            |
| 20. | deLeeuw      | 2016 | de Leeuw S. The heart of being alive. <i>Canadian Family Physician</i> . 2016 Mar 1;62(3):246-9.                                                                                                                                                                           |
| 21. | Dermer       | 2013 | Dermer M. Drivers of overtesting. <i>Canadian Family Physician</i> . 2013 Jan 1;59(1):25.                                                                                                                                                                                  |
| 22. | Doré         | 2017 | Doré M. Hospitalists and family physicians. <i>Canadian Family Physician</i> . 2017;63(6):429.                                                                                                                                                                             |
| 23. | Dubé         | 2013 | Dubé C. Putting an end to the misuse of the fecal occult blood test in diagnostic medicine. <i>Canadian Journal of Gastroenterology and Hepatology</i> . 2013;27(12):695.                                                                                                  |
| 24. | Ferraro      | 2017 | Ferraro S, Panteghini M. The role of laboratory in ensuring appropriate test requests. <i>Clinical Biochemistry</i> . 2017 Jul 1;50(10-11):555-61.                                                                                                                         |
| 25. | Ferrusi      | 2012 | Ferrusi IL, Trudeau M, Earle CC, Leighl N, Pullenayegum E, Khong H, et al. PCN158 Adherence to Human Epidermal Growth Factor Receptor-2 (HER2) testing & adjuvant trastuzumab treatment guidelines in a Canadian province. <i>Value in Health</i> . 2012 Nov 1;15(7):A438. |
| 26. | Fine         | 2014 | Fine B, Dhanoa D. Imaging appropriateness criteria: why Canadian family physicians should care. <i>Canadian Family Physician</i> . 2014 Mar 1;60(3):217-8.                                                                                                                 |
| 27. | Firoz        | 2012 | Firoz T, Magee LA, Payne BA, Menzies JM, von Dadelszen P. The PIERS experience: research or quality improvement? <i>Journal of Obstetrics and Gynaecology Canada</i> . 2012 Apr 1;34(4):379-81.                                                                            |
| 28. | Fitzpatrick  | 2017 | Fitzpatrick RM, Bella AJ. 117 Adherence of primary care physicians to the Canadian Diabetes Association clinical practice guidelines for erectile dysfunction and hypogonadism. <i>The Journal of Sexual Medicine</i> . 2017 Jan 1;14(1):S31-2.                            |

| No. | First Author | Year | Full Citation or Source                                                                                                                                                                                                            |
|-----|--------------|------|------------------------------------------------------------------------------------------------------------------------------------------------------------------------------------------------------------------------------------|
| 29. | Fleet        | 2013 | Fleet R, Archambault P, Plant J, Poitras J. Access to emergency care in rural Canada: should we be concerned? <i>Canadian Journal of Emergency Medicine</i> . 2013 Jul;15(4):191-3.                                                |
| 30. | Flug         | 2015 | Flug JA. Re:“effect of governmental intervention on appropriateness of lumbar mri referrals: a canadian experience”. <i>Journal of the American College of Radiology</i> . 2015 Feb 1;12(2):208-9.                                 |
| 31. | Ford-Jones   | 2012 | Ford-Jones L, Levin L, Schneider R, Daneman D. A new social pediatrics elective—a tool for moving to life course developmental health. <i>The Journal of Pediatrics</i> . 2012 Mar 1;160(3):357-8.                                 |
| 32. | Fraser       | 2013 | Fraser J, Reed M. Appropriateness of imaging in Canada. 2013.                                                                                                                                                                      |
| 33. | Friedman     | 2017 | Friedman JN. Saying yes to the less: making it easier to choose wisely. <i>The Journal of Pediatrics</i> . 2017 May 1;184:4-5.                                                                                                     |
| 34. | Gagné        | 2013 | Gagné L. Quality of health care: from declaration to action. <i>Perspective Infirmiere: Revue Officielle de l'Ordre des Infirmieres et Infirmiers du Quebec</i> . 2013;10(5):21-4.                                                 |
| 35. | Gapanenko    | 2017 | Gapanenko K, Lam D, Parker M, D'Silva J, Johnson T. Unnecessary care in Canada. <i>Healthcare Quarterly (Toronto, Ont.)</i> . 2017;20(3):10.                                                                                       |
| 36. | Grad         | 2016 | Grad R. Choosing Wisely Canada. <i>Canadian Family Physician</i> . 2016 Sep 1;62(9):729.                                                                                                                                           |
| 37. | Gray         | 2018 | Gray SL, Marcum ZA, Schmader KE, Hanlon JT. Update on medication use quality and safety in older adults, 2017. <i>Journal of the American Geriatrics Society</i> . 2018 Dec;66(12):2254-8.                                         |
| 38. | Grunfeld     | 2007 | Grunfeld E. Canadian breast cancer guidelines are as effective as possible under the circumstances. <i>CMAJ</i> . 2007 Mar 13;176(6):785-6.                                                                                        |
| 39. | Guenther     | 2011 | Guenther D, Fowler N, Lee L. Clinical uncertainty: helping our learners. <i>Canadian Family Physician</i> . 2011 Jan 1;57(1):120-2.                                                                                                |
| 40. | Gulamhusein  | 2014 | Gulamhusein H, Yun L, Cheung AM, Sutradhar R, Paszat L, Warde P, et al. Bisphosphonate prescriptions in men with androgen deprivation therapy use. <i>JAMA</i> . 2014 Dec 3;312(21):2285-6.                                        |
| 41. | Gurtner      | 2019 | Gurtner KE, May DN, Raman JD, Lata-Arias K, Canter DJ. Isolated adrenal metastectomy has a low morbidity rate irrespective of performing surgical subspecialty. <i>The Canadian Journal of Urology</i> . 2019 Oct;26(5):9931-9937. |

| No. | First Author  | Year | Full Citation or Source                                                                                                                                                                                                                 |
|-----|---------------|------|-----------------------------------------------------------------------------------------------------------------------------------------------------------------------------------------------------------------------------------------|
| 42. | Hammond       | 2010 | Hammond I, Lentle BC, Odell PF. The pursuit of impalpable thyroid nodules: are we using scarce resources wisely? <i>Canadian Association of Radiologists' Journal</i> . 2010 Apr;61(2):98-101.                                          |
| 43. | Harrison      | 2010 | Harrison MB, Légaré F, Graham ID, Fervers B. Adapting clinical practice guidelines to local context and assessing barriers to their use. <i>CMAJ</i> . 2010 Feb 9;182(2):E78-84.                                                        |
| 44. | Heffner       | 2009 | Heffner JE. Toward leaner tracheostomy care: first observe, then improve. <i>Respir Care</i> . 2009 Dec;54(12):1635-7.                                                                                                                  |
| 45. | Heilman       | 2007 | Heilman RS. Practice corner: waiting for care in universal coverage: a deal breaker or an irritant?. <i>Radiographics</i> . 2007 Jul;27(4):1191-2.                                                                                      |
| 46. | Hiremath      | 2020 | Hiremath S, Sapir-Pichhadze R, Nakhla M, Gabor JY, Khan NA, Kuyper LM, et al. Hypertension Canada's 2020 evidence review and guidelines for the management of resistant hypertension. <i>Can J Cardiol</i> . 2020 May;36(5):625-634.    |
| 47. | Jha           | 2015 | Jha S, Ware JB. Mammogram trials. <i>Academic Radiology</i> . 2015; 22(8): 973-975.                                                                                                                                                     |
| 48. | Katz          | 2012 | Katz JN, Martin TL. Clinical pathways and the commodification of total joint replacement. <i>Osteoarthritis and Cartilage</i> . 2012 Oct 1;20(10):1057-8.                                                                               |
| 49. | Kermode-Scott | 2010 | Kermode-Scott B. Ineffective surgical procedures are used to treat Canadians with osteoarthritis. <i>BMJ</i> . 2010 Dec 29;341:c7436.                                                                                                   |
| 50. | Kermode-Scott | 2013 | Kermode-Scott B. Canadian doctors join campaign against unnecessary tests and treatments. <i>BMJ</i> . 2013 Sep 2;347:f5370.                                                                                                            |
| 51. | Kermode-Scott | 2014 | Kermode-Scott B. Nine Canadian medical bodies launch campaign to reduce unnecessary medical tests and treatments. <i>BMJ: British Medical Journal</i> . 2014 Apr 8;348.                                                                 |
| 52. | Law           | 2019 | Law TK, Bouck Z, Yin XC, Dudzinski D, Thavendiranathan P, Nesbitt GC, et al. Association between TTE appropriateness, echocardiographic findings, and clinical outcomes. <i>JACC: Cardiovascular Imaging</i> . 2019 Feb 4;12(2):379-81. |
| 53. | Ma            | 2020 | Ma I, Guo M, Lau CK, Kandalam V, Naugler C. Dataset of test volume and tests repeated for complete blood count and electrolyte panels from hospitals in a Canadian province in 2018. <i>Data in Brief</i> . 2020 Apr;29:105144.         |
| 54. | Manta         | 2019 | Manta A, O'Grady J, Bleakney R, Theodoropoulos J. Determining the appropriateness of requests for outpatient magnetic resonance imaging of the hip. <i>Can J Surg</i> . 2019 Aug 1;62(4):224-226.                                       |

| No. | First Author | Year | Full Citation or Source                                                                                                                                                                                                                                                                                                       |
|-----|--------------|------|-------------------------------------------------------------------------------------------------------------------------------------------------------------------------------------------------------------------------------------------------------------------------------------------------------------------------------|
| 55. | Massoud      | 2010 | Massoud F, Lysy P, Bergman H. Care of dementia in Canada: a collaborative care approach with a central role for the primary care physician. <i>The Journal of Nutrition, Health &amp; Aging</i> . 2010 14(2):105-6.                                                                                                           |
| 56. | McLaren      | 2008 | McLaren C. British Columbia experiments with checkups by the dozen. <i>CMAJ: Canadian Medical Association Journal</i> . 2008 Nov 18;179(11):1111.                                                                                                                                                                             |
| 57. | Merry        | 2013 | Merry A. An overview of quality and safety in health care. <i>Can J Anesth</i> . 2013 60:101-10.                                                                                                                                                                                                                              |
| 58. | Moulton      | 2017 | Moulton D. As much as 20% of Newfoundland's health budget may be inappropriately spent. <i>CMAJ</i> . 2017 Feb 13;189(6):E255.                                                                                                                                                                                                |
| 59. | Neuman       | 2019 | Neuman MD, Bateman BT, Wunsch H. Inappropriate opioid prescription after surgery. <i>The Lancet</i> . 2019 Apr 13;393(10180):1547-57.                                                                                                                                                                                         |
| 60. | Ong          | 2019 | Ong SW, Kaushal A, Pariser P, Chan CT. An integrated kidney care econsult practice model: results from the ikinect project. <i>Am J Nephrol</i> 2019;50:262-271.                                                                                                                                                              |
| 61. | Ong-Tone     | 2013 | Ong-Tone L, Bell A. Practice patterns of Canadian Ophthalmological Society members in cataract surgery—2012 survey. <i>Canadian Journal of Ophthalmology</i> . 2013 Apr 1;48(2):77-8.                                                                                                                                         |
| 62. | Patasi       | 2008 | Patasi B, Conway JR. Enhancing diabetes care in family practice: A flow sheet. <i>Canadian Family Physician</i> . 2008 Sep 1;54(9):1237-8.                                                                                                                                                                                    |
| 63. | Rayat        | 2016 | Rayat JS, Grewal PS, Whelan J, Tennant MT, Choudhry N. Canadian preference and trends survey results for anti-VEGF treatment of macular edema. <i>Canadian Journal of Ophthalmology</i> . 2016 Jun 1;51(3):233-7.                                                                                                             |
| 64. | Rossignol    | 2013 | Rossignol M, Moutquin JM, Boughrassa F, Bédard MJ, Chaillet N, Charest C, et al. Preventable obstetrical interventions: how many caesarean sections can be prevented in Canada? <i>Journal of Obstetrics and Gynaecology Canada</i> . 2013 May 1;35(5):434-43.                                                                |
| 65. | Samuel       | 2019 | Samuel SM, Dart A, Filler G, Bitzan M, Pinsk M, Mammen C, et al. The Canadian childhood nephrotic syndrome (CHILDNEPH) study: report on mid-study feasibility, recruitment and main measures. <i>BMC Nephrology</i> . 2019 Dec;20(1):159.                                                                                     |
| 66. | Seitz        | 2018 | Seitz, Dallas. Optimizing Prescribing of Antipsychotics in Long-Term Care (OPAL): A Randomized Trial to Reduce Inappropriate Antipsychotic Prescribing in Long-Term Care. <i>Clinical Trial</i> : <a href="https://clinicaltrials.gov/ct2/show/study/NCT03557593">https://clinicaltrials.gov/ct2/show/study/NCT03557593</a> . |
| 67. | Silversides  | 2010 | Silversides A. Canadian physicians playing “catch-up” in adopting electronic medical records. <i>CMAJ</i> . 2010 Feb 9;182(2):E103-4                                                                                                                                                                                          |

| No. | First Author | Year | Full Citation or Source                                                                                                                                                                                                                                                     |
|-----|--------------|------|-----------------------------------------------------------------------------------------------------------------------------------------------------------------------------------------------------------------------------------------------------------------------------|
| 68. | Steeb        | 2020 | Steeb T, Hayani KM, Förster P, Liegl R, Toussaint F, Schlaak M, et al. Guidelines for uveal melanoma: a critical appraisal of systematically identified guidelines using the AGREE II and AGREE-REX instrument. <i>J Cancer Res Clin Oncol</i> . 2020 Apr;146(4):1079-1088. |
| 69. | vanDorn      | 2017 | van Dorn A. A third of patients diagnosed with asthma have no current symptoms, lending support to guideline recommendations. <i>The Lancet Respiratory Medicine</i> . 2017 Mar 1;5(3):171.                                                                                 |
| 70. | Zhou         | 2018 | Zhou C, Rajaratnam T, Abbey S, Hawa R, Sheehan K, Sockalingam S. Measuring quality of care in consultation liaison psychiatry: outcomes from two Canadian hospitals. <i>General Hospital Psychiatry</i> . 2018;54:54.                                                       |

#### Wrong setting (n= 85)

| No. | First Author | Year | Full Citation or Source                                                                                                                                                                                                                                                                                                                                        |
|-----|--------------|------|----------------------------------------------------------------------------------------------------------------------------------------------------------------------------------------------------------------------------------------------------------------------------------------------------------------------------------------------------------------|
| 1.  | Abell        | 2017 | Abell JE, Laing SM, Barker TC, Norry EC, Starzyk K, Goodman SG, et al. Adjunctive use of anticoagulants at the time of percutaneous coronary intervention in patients with an acute coronary syndrome treated with fondaparinux: a multinational retrospective review. <i>European Heart Journal–Cardiovascular Pharmacotherapy</i> . 2017 Apr 18;3(4):214-20. |
| 2.  | Abeyesiri    | 2019 | Abeyesiri S, Chau M, Highton D, Richards T. Management of the patient presenting with anaemia in the preoperative setting. <i>Transfus Apher Sci</i> . 2019 Aug;58(4):392-396.                                                                                                                                                                                 |
| 3.  | Albano       | 2010 | Albano F, Vecchio AL, Guarino A. The applicability and efficacy of guidelines for the management of acute gastroenteritis in outpatient children: a field-randomized trial on primary care pediatricians. <i>The Journal of Pediatrics</i> . 2010 Feb 1;156(2):226-30.                                                                                         |
| 4.  | Alghamdi     | 2017 | Alghamdi M, Li H, Olivotto I, Easaw J, Kelly J, Nordal R, et al. Atypical meningioma: referral patterns, treatment and adherence to guidelines. <i>Canadian Journal of Neurological Sciences</i> . 2017 May;44(3):283-7.                                                                                                                                       |
| 5.  | Aljebreen    | 2013 | Aljebreen AM, Alswat K, Almadi MA. Appropriateness and diagnostic yield of upper gastrointestinal endoscopy in an open-access endoscopy system. <i>Saudi Journal of Gastroenterology: Official Journal of the Saudi Gastroenterology Association</i> . 2013 Sep;19(5):219.                                                                                     |

| No. | First Author | Year | Full Citation or Source                                                                                                                                                                                                                                                                                                                                                                             |
|-----|--------------|------|-----------------------------------------------------------------------------------------------------------------------------------------------------------------------------------------------------------------------------------------------------------------------------------------------------------------------------------------------------------------------------------------------------|
| 6.  | Allepuz      | 2011 | Allepuz A, Quintana JM, Espallargues M, Escobar A, Moharra M, Arostegui I. Relationship between total hip replacement appropriateness and surgical priority instruments. <i>Journal of Evaluation in Clinical Practice</i> . 2011 Feb;17(1):18-25.                                                                                                                                                  |
| 7.  | Anderson     | 2018 | Anderson JL, Knowlton KU, May HT, Bair TL, Armstrong SO, Lappé DL, et al. Temporal changes in statin prescription and intensity at discharge and impact on outcomes in patients with newly diagnosed atherosclerotic cardiovascular disease—Real-world experience within a large integrated health care system: The IMPRES study. <i>Journal of Clinical Lipidology</i> . 2018 Jul 1;12(4):1008-18. |
| 8.  | Ashurst      | 2014 | Ashurst JV, Nappe T, Digiambattista S, Kambhampati A, Alam S, Ortiz M, et al. Effect of triage-based use of the Ottawa foot and ankle rules on the number of orders for radiographic imaging. <i>The Journal of the American Osteopathic Association</i> . 2014 Dec 1;114(12):890-1.                                                                                                                |
| 9.  | Ayieko       | 2019 | Ayieko P, Irimu G, Ogero M, Mwaniki P, Malla L, Julius T, et al. Effect of enhancing audit and feedback on uptake of childhood pneumonia treatment policy in hospitals that are part of a clinical network: a cluster randomized trial. <i>Implement Sci</i> . 2019 Mar 4;14(1):20.                                                                                                                 |
| 10. | Bala         | 2019 | Bala SS, Jamieson HA, Nishtala PS. Determinants of prescribing potentially inappropriate medications in a nationwide cohort of community dwellers with dementia receiving a comprehensive geriatric assessment. <i>Int J Geriatr Psychiatry</i> . 2019 Jan;34(1):153-161.                                                                                                                           |
| 11. | Beriwal      | 2012 | Beriwal S, Rajagopalan MS, Flickinger JC, Rakfal SM, Rodgers E, Heron DE. How effective are clinical pathways with and without online peer-review? An analysis of bone metastases pathway in a large, integrated National Cancer Institute–Designated Comprehensive Cancer Center Network. <i>International Journal of Radiation Oncology* Biology* Physics</i> . 2012 Jul 15;83(4):1246-51.        |
| 12. | Bhatia       | 2014 | Bhatia RS, Dudzinski DM, Malhotra R, Milford CE, Sanborn DM, Picard MH, et al. Educational intervention to reduce outpatient inappropriate echocardiograms: a randomized control trial. <i>JACC: Cardiovascular Imaging</i> . 2014 Sep 1;7(9):857-66.                                                                                                                                               |
| 13. | Boltin       | 2016 | Boltin D, Kimchi N, Dickman R, Gingold-Belfer R, Niv Y, Birkenfeld S. Attitudes and practice related to <i>Helicobacter pylori</i> infection among primary care physicians. <i>European Journal of Gastroenterology &amp; Hepatology</i> . 2016 Sep 1;28(9):1035-40.                                                                                                                                |



| No. | First Author | Year | Full Citation or Source                                                                                                                                                                                                                                                                              |
|-----|--------------|------|------------------------------------------------------------------------------------------------------------------------------------------------------------------------------------------------------------------------------------------------------------------------------------------------------|
| 14. | Bottle       | 2018 | Bottle A, Kim D, Aylin PP, Majeed FA, Cowie MR, Hayhoe B. Real-world presentation with heart failure in primary care: do patients selected to follow diagnostic and management guidelines have better outcomes? <i>Open Heart</i> . 2018 Nov 1;5(2):e000935.                                         |
| 15. | Bozan        | 2019 | Bozan Ö, Aksel G, Kahraman HA, Giritli Ö, Eroğlu SE. Comparison of PECARN and CATCH clinical decision rules in children with minor blunt head trauma. <i>Eur J Trauma Emerg Surg</i> . 2019 Oct;45(5):849-855.                                                                                       |
| 16. | Brewster     | 2010 | Brewster S, Turkeri L, Brausi M, Ravery V, Djavan B. 5A prospective survey of current prostate biopsy practices among oncological urologists. <i>The Canadian Journal of Urology</i> . 2010 Apr;17(2):5071-6.                                                                                        |
| 17. | Bundy        | 2019 | Bundy DG, Singh H, Stein RE, Brady TM, Lehmann CU, Heo M, et al. The design and conduct of Project RedDE: a cluster-randomized trial to reduce diagnostic errors in pediatric primary care. <i>Clin Trials</i> . 2019 Apr;16(2):154-164.                                                             |
| 18. | Casebeer     | 2018 | Casebeer A, Antol DD, DeClue RW, Hopson S, Li Y, Khoury R, et al. The relationship between guideline-recommended initiation of therapy, outcomes, and cost for patients with metastatic non-small cell lung cancer. <i>Journal of Managed Care &amp; Specialty Pharmacy</i> . 2018 Jun;24(6):554-64. |
| 19. | Cellina      | 2018 | Cellina M, Panzeri M, Floridi C, Martinenghi CM, Clesceri G, Oliva G. Overuse of computed tomography for minor head injury in young patients: an analysis of promoting factors. <i>La Radiologia Medica</i> . 2018 Jul 1;123(7):507-14.                                                              |
| 20. | Chalmers     | 2010 | Chalmers JD, Singanayagam A, Akram AR, Choudhury G, Mandal P, Hill AT. Safety and efficacy of CURB65-guided antibiotic therapy in community-acquired pneumonia. <i>Journal of Antimicrobial Chemotherapy</i> . 2010 Nov 16;66(2):416-23.                                                             |
| 21. | Chapman      | 2008 | Chapman KR. Asthma in Canada: missing the treatment targets. <i>CMAJ</i> . 2008;178(8):1027-8.                                                                                                                                                                                                       |
| 22. | Chung        | 2016 | Chung J, Tchaconas A, Meryash D, Adesman A. Treatment of attention-deficit/hyperactivity disorder in preschool-age children: child and adolescent psychiatrists' adherence to clinical practice guidelines. <i>Journal of Child and Adolescent Psychopharmacology</i> . 2016 May 1;26(4):335-43.     |
| 23. | Cowan        | 2016 | Cowan JB, Bedi A, Carpenter JE, Robbins CB, Gagnier JJ, Miller BS. Evaluation of American Academy of Orthopaedic Surgeons Appropriate Use Criteria for the management of full-thickness rotator cuff tears. <i>Journal of Shoulder and Elbow Surgery</i> . 2016 Jul 1;25(7):1100-6.                  |

| No. | First Author | Year | Full Citation or Source                                                                                                                                                                                                                                                                      |
|-----|--------------|------|----------------------------------------------------------------------------------------------------------------------------------------------------------------------------------------------------------------------------------------------------------------------------------------------|
| 24. | DeLuca       | 2018 | De Luca L, Temporelli PL, Lucci D, Colivicchi F, Calabro P, Riccio C, et al. Characteristics, treatment and quality of life of stable coronary artery disease patients with or without angina: Insights from the START study. <i>PloS One</i> . 2018;13(7).                                  |
| 25. | Ditkoff      | 2018 | Ditkoff EL, Theofanides M, Aisen CM, Kowalik CG, Cohn JA, Sui W, et al. Assessment of practices in screening and treating women with bacteriuria. <i>The Canadian Journal of Urology</i> . 2018 Oct;25(5):9486-96.                                                                           |
| 26. | Eder         | 2018 | Eder L, Harvey P, Chandran V, Rosen CF, Dutz J, Elder JT, et al. Gaps in diagnosis and treatment of cardiovascular risk factors in patients with psoriatic disease: an international multicenter study. <i>The Journal of Rheumatology</i> . 2018 Mar 1;45(3):378-84.                        |
| 27. | Ellis        | 2019 | Ellis CT, Cole AL, Sanoff HK, Hinton S, Dusetzina SB, Stitzenberg KB. Evaluating Surveillance patterns after chemoradiation-only compared with conventional management for older patients with rectal cancer. <i>Journal of the American College of Surgeons</i> . 2019 May 1;228(5):782-91. |
| 28. | Fanning      | 2012 | Fanning F, Foley S, Lawlor E, McWilliams S, Jackson D, Renwick L, et al. Group cognitive behavioural therapy for first episode psychosis: who's referred, who attends and who completes it? <i>Early Intervention in Psychiatry</i> . 2012 Nov;6(4):432-41.                                  |
| 29. | Fischer      | 2014 | Fischer SH, Tjia J, Reed G, Peterson D, Gurwitz JH, Field TS. Factors associated with ordering laboratory monitoring of high-risk medications. <i>Journal of General Internal Medicine</i> . 2014 Dec 1;29(12):1589-98.                                                                      |
| 30. | Förberg      | 2015 | Förberg U, Unbeck M, Wallin L, Johansson E, Petzold M, Ygge BM, et al. Effects of computer reminders on complications of peripheral venous catheters and nurses' adherence to a guideline in paediatric care—a cluster randomised study. <i>Implementation Science</i> . 2015 Dec;11(1):10.  |
| 31. | Gimbel       | 2018 | Gimbel RW, Pirralo RG, Lowe SC, Wright DW, Zhang L, Woo MJ, et al. Effect of clinical decision rules, patient cost and malpractice information on clinician brain CT image ordering: a randomized controlled trial. <i>BMC Medical Informatics and Decision Making</i> . 2018 Dec;18(1):20.  |
| 32. | Gershon      | 2017 | Gershon AS, Mecredy G, Ratnasingham S. <i>Chronic Obstructive Pulmonary Disease in Ontario, 1996/97 to 2014/15</i> . Toronto, ON: Institute for Clinical Evaluative Sciences; 2017                                                                                                           |

| No. | First Author      | Year | Full Citation or Source                                                                                                                                                                                                                                                                                                                                   |
|-----|-------------------|------|-----------------------------------------------------------------------------------------------------------------------------------------------------------------------------------------------------------------------------------------------------------------------------------------------------------------------------------------------------------|
| 33. | Guerrero          | 2019 | Guerrero MD, Barnes JD, Walsh JJ, Chaput JP, Tremblay MS, Goldfield GS. 24-hour movement behaviors and impulsivity. <i>Pediatrics</i> . 2019 Sep;144(3):e20190187.                                                                                                                                                                                        |
| 34. | Goodarzi-Khoigani | 2018 | Goodarzi-Khoigani M, Moghadam MH, Nadjarzadeh A, Mardanian F, Fallahzadeh H, Mahmoodabad SS. Prevention of excessive gestational weight gain by nutrition education intervention: a randomized controlled trial. <i>Health Scope</i> . 2018 Aug;7(3).                                                                                                     |
| 35. | Gresham           | 2019 | Gresham LM, Sadiq M, Gresham G, McGrath M, Lacelle K, Szeto M, et al. Evaluation of the effectiveness of an enhanced recovery after surgery program using data from the National Surgical Quality Improvement Program. <i>Canadian Journal of Surgery</i> . 2019 Jun;62(3):175.                                                                           |
| 36. | Hagiwara          | 2013 | Hagiwara M, Delea TE, Stanford RH. Risk of asthma exacerbation, asthma-related health care utilization and costs, and adherence to controller therapy in patients with asthma receiving fluticasone propionate/salmeterol inhalation powder 100 µg/50 µg versus mometasone furoate inhalation powder. <i>Journal of Asthma</i> . 2013 Apr 1;50(3):287-95. |
| 37. | Hanna             | 2013 | Hanna FA, Sambirska O, Iyer S, Szpunar S, Fakhri MG. Clinician practice and the National Healthcare Safety Network definition for the diagnosis of catheter-associated urinary tract infection. <i>American Journal of Infection Control</i> . 2013 Dec 1;41(12):1173-7.                                                                                  |
| 38. | Helmandollar      | 2020 | Helmandollar KJ, Lorei NC, Clement BC, Hoverson KR, Logemann NF. Management of melanoma patients by non-dermatologists in the military health system: a retrospective observational study. <i>Mil Med</i> . 2020 Mar 2;185(3-4):506-511.                                                                                                                  |
| 39. | Hicks             | 2020 | Hicks CW, Holscher CM, Wang P, Black JH 3rd, Abularrage CJ, Makary MA. Overuse of early peripheral vascular interventions for claudication. <i>J Vasc Surg</i> . 2020 Jan;71(1):121-130.e1.                                                                                                                                                               |
| 40. | Houston           | 2013 | Houston TK, DeLaughter KL, Ray MN, Gilbert GH, Allison JJ, Kiefe CI, Volkman JE. Cluster-randomized trial of a web-assisted tobacco quality improvement intervention of subsequent patient tobacco product use: a National Dental PBRN study. <i>BMC Oral Health</i> . 2013 Dec;13(1):13.                                                                 |
| 41. | Hutyra            | 2019 | Hutyra CA, Streufert B, Politzer CS, Agaba P, Rubin E, Orlando LA, et al. Assessing the effectiveness of evidence-based medicine in practice: a case study of first-time anterior shoulder dislocations. <i>JBJS</i> . 2019 Jan 16;101(2):e6.                                                                                                             |

| No. | First Author | Year | Full Citation or Source                                                                                                                                                                                                                                                                                         |
|-----|--------------|------|-----------------------------------------------------------------------------------------------------------------------------------------------------------------------------------------------------------------------------------------------------------------------------------------------------------------|
| 42. | Hyams        | 2012 | Hyams ES, Matlaga BR, Korley FK. Practice patterns in the emergency care of kidney stone patients: an analysis of the National Hospital Ambulatory Medical Care Survey (NHAMCS). <i>The Canadian Journal of Urology</i> . 2012 Aug;19(4):6351-9.                                                                |
| 43. | Jeon         | 2020 | Jeon SW, Hong SJ, Lee ST, Kim H, Chun HJ; Research Group for Endoscopic Submucosal Dissection in Korean Society of Gastrointestinal Endoscopy. Clinical practice and guidelines for managing antithrombotics before and after endoscopy: a national survey study. <i>Gut Liver</i> . 2020 May 15;14(3):316-322. |
| 44. | Jiang        | 2015 | Jiang R, Tomaszewski JJ, Ward KC, Uzzo RG, Canter DJ. The burden of overtreatment: comparison of toxicity between single and combined modality radiation therapy among low risk prostate cancer patients. <i>The Canadian Journal of Urology</i> . 2015 Feb;22(1):7648-55.                                      |
| 45. | Kerns        | 2019 | Kerns EK, Staggs VS, Fouquet SD, McCulloh RJ. Estimating the impact of deploying an electronic clinical decision support tool as part of a national practice improvement project. <i>Journal of the American Medical Informatics Association</i> . 2019 Jul;26(7):630-6.                                        |
| 46. | Kim          | 2010 | Kim D, Wadley R. Variability in techniques and patient safety protocols in discography: a national multispecialty survey of International Spine Intervention Society members. <i>Clinical Spine Surgery</i> . 2010 Aug 1;23(6):431-8.                                                                           |
| 47. | Kim          | 2019 | Kim JH, Kim BR, Kim SR, Han EY, Nam KW, Lee SY, et al. Functional outcomes after critical pathway for inpatient rehabilitation of total knee arthroplasty. <i>Ann Rehabil Med</i> . 2019 Dec;43(6):650-661.                                                                                                     |
| 48. | Klang        | 2017 | Klang E, Beytelman A, Greenberg D, Or J, Guranda L, Konen E, et al. Overuse of head CT examinations for the investigation of minor head trauma: analysis of contributing factors. <i>Journal of the American College of Radiology</i> . 2017 Feb 1;14(2):171-6.                                                 |
| 49. | Kingdon      | 2019 | Kingdon D. Outcome-based providing and commissioning: pathways and standards. <i>BJ Psych Bull</i> . 2019 Jun 10;282-286.                                                                                                                                                                                       |
| 50. | Komajda      | 2016 | Komajda M, Anker SD, Cowie MR, Filippatos GS, Mengelle B, Ponikowski P, et al. Physicians' adherence to guideline-recommended medications in heart failure with reduced ejection fraction: data from the QUALIFY global survey. <i>European Journal of Heart Failure</i> . 2016 May;18(5):514-22.               |
| 51. | Kroll        | 2016 | Kroll DS, Nieva HR, Barsky AJ, Linder JA. Benzodiazepines are prescribed more frequently to patients already at risk for benzodiazepine-related adverse events in primary care. <i>Journal of General Internal Medicine</i> . 2016 Sep 1;31(9):1027-34.                                                         |

| No. | First Author     | Year | Full Citation or Source                                                                                                                                                                                                                                                                              |
|-----|------------------|------|------------------------------------------------------------------------------------------------------------------------------------------------------------------------------------------------------------------------------------------------------------------------------------------------------|
| 52. | Kwon             | 2012 | Kwon JH, Fausone MK, Du H, Robicsek A, Peterson LR. Impact of laboratory-reported urine culture colony counts on the diagnosis and treatment of urinary tract infection for hospitalized patients. <i>American Journal of Clinical Pathology</i> . 2012 May 1;137(5):778-84.                         |
| 53. | Lin              | 2013 | Lin OS, Gluck M, Nguyen M, Koch J, Kozarek RA. Screening patterns in patients with a family history of colorectal cancer often do not adhere to national guidelines. <i>Digestive Diseases and Sciences</i> . 2013 Jul 1;58(7):1841-8.                                                               |
| 54. | Martinez         | 2014 | Martinez V, Attal N, Vanzo B, Vicaud E, Gautier JM, Bouhassira D, et al. Adherence of French GPs to chronic neuropathic pain clinical guidelines: results of a cross-sectional, randomized, “e” case-vignette survey. <i>PLoS One</i> . 2014 Apr 18;9(4):e93855.                                     |
| 55. | Masroor          | 2019 | Masroor F, Corpman D, Carpenter DM, Ritterman Weintraub M, Cheung KHN, Wang KH. Association of NCCN-recommended posttreatment surveillance with outcomes in patients with HPV-associated oropharyngeal squamous cell carcinoma. <i>JAMA Otolaryngol Head Neck Surg</i> . 2019 Aug 8;145(10):903–8.   |
| 56. | Meyers           | 2011 | Meyers JL, Candrilli SD, Kovacs B. Type 2 diabetes mellitus and renal impairment in a large outpatient electronic medical records database: rates of diagnosis and antihyperglycemic medication dose adjustment. <i>Postgraduate Medicine</i> . 2011 May 1;123(3):133-43.                            |
| 57. | Mittal           | 2020 | Mittal C, Dang D, Stoffel E, Menees S, Scott FI, Ahnen D, Patel SG. Underutilization of lynch syndrome screening at two large veterans affairs medical centers. <i>Dig Dis Sci</i> . 2020 Jun 4.                                                                                                     |
| 58. | Mulder-Wildemors | 2020 | Mulder-Wildemors LGM, Heringa M, Floor-Schreudering A, Jansen PAF, Bouvy ML. Reducing inappropriate drug use in older patients by use of clinical decision support in community pharmacy: a mixed-methods evaluation. <i>Drugs Aging</i> . 2020 Feb;37(2):115-123.                                   |
| 59. | Muñoz            | 2012 | Muñoz P, Rojas L, Cervera C, Garrido G, Fariñas MC, Valerio M, et al. Poor compliance with antifungal drug use guidelines by transplant physicians: a framework for educational guidelines and an international consensus on patient safety. <i>Clinical Transplantation</i> . 2012 Jan;26(1):87-96. |
| 60. | Niles            | 2018 | Niles DE, Duval-Arnould J, Skellett S, Knight L, Su F, Raymond TT, et al. Characterization of pediatric in-hospital cardiopulmonary resuscitation quality metrics                                                                                                                                    |

| No. | First Author | Year | Full Citation or Source                                                                                                                                                                                                                                                              |
|-----|--------------|------|--------------------------------------------------------------------------------------------------------------------------------------------------------------------------------------------------------------------------------------------------------------------------------------|
|     |              |      | across an international resuscitation collaborative. <i>Pediatric Critical Care Medicine</i> . 2018 May 1;19(5):421-32.                                                                                                                                                              |
| 61. | Ninni        | 2020 | Ninni S, Echivard M, Marquié C, Ortmans S, Labreuche J, Drumez E, et al. Predictors of subcutaneous intracoronary cardioverter-defibrillator shocks and prognostic impact in patients with structural heart disease. <i>Can J Cardiol</i> . 2020 May 28:S0828-282X(20)30511-0.       |
| 62. | Nobel        | 2019 | Nobel TB, Lavery JA, Barbetta A, Gennarelli RL, Lidor AO, Jones DR, et al. National guidelines may reduce socioeconomic disparities in treatment selection for esophageal cancer. <i>Dis Esophagus</i> . 2019 May 1;32(5):doy111.                                                    |
| 63. | Nseir        | 2014 | Nseir S, Martin-Loeches I, Makris D, Jaillette E, Karvouniaris M, Valles J, et al. Impact of appropriate antimicrobial treatment on transition from ventilator-associated tracheobronchitis to ventilator-associated pneumonia. <i>Critical Care</i> . 2014 Jun;18(3):R129.          |
| 64. | Nussenblatt  | 2014 | Nussenblatt V, Avdic E, Berenholtz S, Daugherty E, Hadhazy E, Lipsett PA, et al. Ventilator-associated pneumonia: overdiagnosis and treatment are common in medical and surgical intensive care units. <i>Infection Control &amp; Hospital Epidemiology</i> . 2014 Mar;35(3):278-84. |
| 65. | Odell        | 2019 | Odell DD, Feinglass J, Engelhardt K, Papastefan S, Meyerson SL, Bharat A, et al. Evaluation of adherence to the Commission on Cancer lung cancer quality measures. <i>The Journal of Thoracic and Cardiovascular Surgery</i> . 2019 Mar 1;157(3):1219-35.                            |
| 66. | Patel        | 2014 | Patel PA, Ravi KA, Ripley DP, Kane J, Wass E, Carr A, et al. Clinician referrals for stress echocardiography: are we compliant with the NICE guidelines? <i>Echo Research and Practice</i> . 2014 Jul 1;1(1):17-21.                                                                  |
| 67. | Pineda R     | 2019 | Pineda R, DeGaetano S, Kindra M, Hand T, Craig J, Fernandez-Fernandez A, et al. Neonatal therapy: a survey of current practice. <i>J Pediatr Rehabil Med</i> . 2019;12(3):285-294.                                                                                                   |
| 68. | Quenot       | 2008 | Quenot JP, Mentec H, Feihl F, Annane D, Melot C, Vignon P, et al. Bedside adherence to clinical practice guidelines in the intensive care unit: the TECLA study. <i>Intensive Care Medicine</i> . 2008 Aug 1;34(8):1393-400.                                                         |
| 69. | Qureishi     | 2014 | Qureishi A, Garas G, Shah J, Birchall J. A two-cycle prospective audit of temporal bone computed tomography scan requests: improving the clinical applicability of radiology reports. <i>The Journal of Laryngology &amp; Otology</i> . 2014 Jan;128(1):49-52.                       |

| No. | First Author | Year | Full Citation or Source                                                                                                                                                                                                                                                                                                                               |
|-----|--------------|------|-------------------------------------------------------------------------------------------------------------------------------------------------------------------------------------------------------------------------------------------------------------------------------------------------------------------------------------------------------|
| 70. | Robinson     | 2020 | Robinson TF, Barsoumian AE, Aden JK, Giancola SE. Evaluation of the trends and appropriateness of fluoroquinolone use in the outpatient treatment of acute uncomplicated cystitis at five family practice clinics. <i>J Clin Pharm Ther.</i> 2020 Jun;45(3):513-519.                                                                                  |
| 71. | Ruwald       | 2014 | Ruwald AC, Schuger C, Moss AJ, Kutylifa V, Olshansky B, Greenberg H, et al. Mortality reduction in relation to implantable cardioverter defibrillator programming in the Multicenter Automatic Defibrillator Implantation Trial-Reduce Inappropriate Therapy (MADIT-RIT). <i>Circulation: Arrhythmia and Electrophysiology.</i> 2014 Oct;7(5):785-92. |
| 72. | Sanghai      | 2020 | Sanghai S, Wong C, Wang Z, Clive P, Tran W, Waring M, et al. Rates of potentially inappropriate dosing of direct-acting oral anticoagulants and associations with geriatric conditions among older patients with atrial fibrillation: the SAGE-AF study. <i>J Am Heart Assoc.</i> 2020 Mar 17;9(6):e014108.                                           |
| 73. | Saposnik     | 2019 | Saposnik G, Menon BK, Kashani N, Wilson AT, Yoshimura S, Campbell BC, et al. Factors associated with the decision-making on endovascular thrombectomy for the management of acute ischemic stroke. <i>Stroke.</i> 2019 Sep;50(9):2441-7.                                                                                                              |
| 74. | Schumacher   | 2018 | Schumacher JR, Neuman HB, Chang GJ, Kozower BD, Edge SB, Yu M, et al. A national study of the use of asymptomatic systemic imaging for surveillance following breast cancer treatment (AFT-01). <i>Annals of Surgical Oncology.</i> 2018 Sep 1;25(9):2587-95.                                                                                         |
| 75. | Sebastiani   | 2020 | Sebastiani G, Cocciolillo S, Mazzola G, Malagoli A, Falutz J, Cervo A, Petta S, Pembroke T, Ghali P, Besutti G, Franconi I. Application of guidelines for the management of nonalcoholic fatty liver disease in three prospective cohorts of HIV-monoinfected patients. <i>HIV Medicine.</i> 2020 Feb;21(2):96-108.                                   |
| 76. | Sharma       | 2020 | Sharma V, Chowdhary S, Abdul F, Džavík V, Varma C. A detailed analysis of patients included in the Summary Hospital-level Mortality Indicator (SHMI) for myocardial infarction (MI)-all is not what it seems? <i>BMJ Open Qual.</i> 2020 Jun;9(2):e000836.                                                                                            |
| 77. | Sinuff       | 2013 | Sinuff T, Muscedere J, Cook DJ, Dodek PM, Anderson W, Keenan SP, et al. Implementation of clinical practice guidelines for ventilator-associated pneumonia: a multicenter prospective study. <i>Critical Care Medicine.</i> 2013 Jan 1;41(1):15-23.                                                                                                   |

| No. | First Author | Year | Full Citation or Source                                                                                                                                                                                                                                                                                                        |
|-----|--------------|------|--------------------------------------------------------------------------------------------------------------------------------------------------------------------------------------------------------------------------------------------------------------------------------------------------------------------------------|
| 78. | Stub         | 2015 | Stub D, Schmicker RH, Anderson ML, Callaway CW, Daya MR, Sayre MR, et al. Association between hospital post-resuscitative performance and clinical outcomes after out-of-hospital cardiac arrest. <i>Resuscitation</i> . 2015 Jul 1;92:45-52.                                                                                  |
| 79. | Vedin        | 2017 | Vedin T, Edelhamre M, Karlsson M, Bergenheim M, Larsson PA. Management of traumatic brain injury in the emergency department: guideline adherence and patient safety. <i>Quality Management in Health Care</i> . 2017 Oct 1;26(4):190-5.                                                                                       |
| 80. | Vorselaars   | 2020 | Vorselaars WM, van Beek DJ, Suurd DP, Postma E, Spiering W, Rinkes IH, Valk GD, Vriens MR. Adrenalectomy for primary aldosteronism: significant variability in work-up strategies and low guideline adherence in worldwide daily clinical practice. <i>World Journal of Surgery</i> . 2020 Feb 5:1-1.                          |
| 81. | Wijk         | 2019 | Wijk L, Udumyan R, Pache B, Altman AD, Williams LL, Elias KM, McGee J, Wells T, Gramlich L, Holcomb K, Ahtari C. International validation of Enhanced Recovery After Surgery Society guidelines on enhanced recovery for gynecologic surgery. <i>American Journal of Obstetrics and Gynecology</i> . 2019 Sep 1;221(3):237-e1. |
| 82. | Wang         | 2019 | Wang M, Ng M, Bukavina L, Mahran A, Kirtishri M, Buzzy C, et al. Superfluous Hospital expenditure associated with unnecessary renal cyst surveillance. <i>Urology Practice</i> . 2019;7(1).                                                                                                                                    |
| 83. | Weiser       | 2020 | Weiser E, Parks PD, Swartz RK, Thomme JV, Lavin PT, Limburg P, et al. Cross-sectional adherence with the multi-target stool DNA test for colorectal cancer screening: real-world data from a large cohort of older adults. <i>J Med Screen</i> . 2020 Feb [Epub ahead of print]                                                |
| 84. | Williams     | 2019 | Williams CR, Jellison A, Martin L, Zhang C, Presson AP, Kraiss LW, et al. Optimal medical management before lower extremity bypass for claudication in the veteran population. <i>J Vasc Surg</i> . 2019 Feb;69(2):545-554.                                                                                                    |
| 85. | Wilshire     | 2020 | Wilshire CL, Fuller CC, Gilbert CR, Handy JR, Costas KE, Louie BE, et al. Electronic medical record inaccuracies: multicenter analysis of challenges with modified lung cancer screening criteria. <i>Can Respir J</i> . 2020 Mar 26;2020:7142568.                                                                             |



## Wrong sample (n= 68)

| No. | First Author    | Year | Full Citation or Source                                                                                                                                                                                                                                                                           |
|-----|-----------------|------|---------------------------------------------------------------------------------------------------------------------------------------------------------------------------------------------------------------------------------------------------------------------------------------------------|
| 1.  | Abdulrehman     | 2019 | Abdulrehman J, Lausman A, Tang GH, Nisenbaum R, Petrucci J, Pavenski K, et al. Development and implementation of a quality improvement toolkit, iron deficiency in pregnancy with maternal iron optimization (IRON MOM): a before-and-after study. <i>PLoS Med.</i> 2019 Aug 20;16(8):e1002867.   |
| 2.  | Alcock          | 2020 | Alcock S, Sawatzky JV, Strome T, Doerksen K. Exploring stroke outcomes following a door-to-needle quality improvement project. <i>Can J Neurol Sci.</i> 2020 Mar;47(2):167-175.                                                                                                                   |
| 3.  | Alessi-Severini | 2013 | Alessi-Severini S, Le Dorze JA, Nguyen D, Honcharik P, Eleff M. Clozapine prescribing in a Canadian outpatient population. <i>PloS One.</i> 2013;8(12).                                                                                                                                           |
| 4.  | Ansari          | 2018 | Ansari S, Fung K, MacNeil SD, Nichols AC, Yoo J, Sowerby LJ. The use of standardized order sets to improve adherence to evidence-based postoperative management in major head and neck surgery. <i>European Annals of Otorhinolaryngology, Head and Neck Diseases.</i> 2018 Sep 1;135(5):S107-11. |
| 5.  | Banihashemi     | 2015 | Banihashemi B, Maftoon K, Chow BJ, Bernick J, Wells GA, Burwash IG. Limitations of free-form-text diagnostic requisitions as a tool for evaluating adherence to appropriate use criteria for transthoracic echocardiography. <i>Cardiovascular Ultrasound.</i> 2015 Dec;13(1):4.                  |
| 6.  | Bendzsak        | 2017 | Bendzsak A, Waddell TK, Yasufuku K, Keshavjee S, de Perrot M, Cypel M, et al. Invasive mediastinal staging guideline concordance. <i>The Annals of Thoracic Surgery.</i> 2017 Jun 1;103(6):1736-41.                                                                                               |
| 7.  | Cappelli        | 2012 | Cappelli M, Glennie JE, Cloutier P, Kennedy A, Vloet M, Newton A, et al. Physician management of pediatric mental health patients in the emergency department: assessment, charting, and disposition. <i>Pediatric Emergency Care.</i> 2012 Sep 1;28(9):835-41.                                   |
| 8.  | Castleberry     | 2017 | Castleberry C, Ziniel S, Almond C, Auerbach S, Hollander SA, Lal AK, et al. Clinical practice patterns are relatively uniform between pediatric heart transplant centers: a survey-based assessment. <i>Pediatric Transplantation.</i> 2017 Aug;21(5):e13013.                                     |
| 9.  | Chan            | 2020 | Chan J, Rajalingam T, Fossella J, Zhou H, Eisenberg N, Roche-Nagle G. Vascular Quality of Care Assessment: Clinicians' Adherence to Lipid lowering therapy for                                                                                                                                    |

| No. | First Author | Year | Full Citation or Source                                                                                                                                                                                                                                           |
|-----|--------------|------|-------------------------------------------------------------------------------------------------------------------------------------------------------------------------------------------------------------------------------------------------------------------|
|     |              |      | Patients with Atherosclerotic Cardiovascular Disease. <i>Annals of vascular surgery</i> . 2020 Jun 15.                                                                                                                                                            |
| 10. | Chen         | 2019 | Chen BY, Perkins H, Ehrensperger E, Minuk J, Vieira L, Wein T, et al. Adherence to guidelines at a stroke prevention clinic: a follow-up study. <i>Canadian Journal of Neurological Sciences</i> . 2019 Jan;46(1):57-63.                                          |
| 11. | Chong        | 2018 | Chong J, Lee TC, Attarian A, Sivakumaran L, Troquet JM, McDonald EG, et al. Association of lower diagnostic yield with high users of CT pulmonary angiogram. <i>JAMA Internal Medicine</i> . 2018 Mar 1;178(3):412-3.                                             |
| 12. | Chopra       | 2018 | Chopra AS, Miyatani M, Craven BC. Cardiovascular disease risk in individuals with chronic spinal cord injury: prevalence of untreated risk factors and poor adherence to treatment guidelines. <i>The Journal of Spinal Cord Medicine</i> . 2018 Jan 2;41(1):2-9. |
| 13. | Chung        | 2009 | Chung F, Yuan H, Yin L, Vairavanathan S, Wong DT. Elimination of preoperative testing in ambulatory surgery. <i>Anesthesia &amp; Analgesia</i> . 2009 Feb 1;108(2):467-75.                                                                                        |
| 14. | Crawford     | 2018 | Crawford EJ, Pincus D, Camp MW, Coyte PC. Cost savings of implementing the SickKids Paediatric Orthopaedic Pathway for proximal humerus fractures in Ontario, Canada. <i>Paediatrics &amp; Child Health</i> . 2018 Aug 16;23(6):e109-16.                          |
| 15. | De Chiara    | 2010 | De Chiara S, Chiumello D, Nicolini R, Vigorelli M, Cesana B, Bottino N, et al. Prolongation of antibiotic prophylaxis after clean and clean-contaminated surgery and surgical site infection. <i>Minerva Anestesiologica</i> . 2010 Jun;76(6):413-9.              |
| 16. | Deyell       | 2013 | Deyell MW, Qi A, Chakrabarti S, Yeung-Lai-Wah JA, Tung S, Khoo C, et al. Prognostic impact of inappropriate defibrillator shocks in a population cohort. <i>Heart</i> . 2013 Sep 1;99(17):1250-5.                                                                 |
| 17. | Di Lalla     | 2019 | Di Lalla V, Fortin B, Pembroke C, Freeman C, Yassa M, Hijal T. Are radiation oncologists following guidelines? An audit of practice in patients with uncomplicated bone metastases. <i>Tech Innov Patient Support Radiat Oncol</i> . 2019 Jan 17;9:13-17.         |
| 18. | Driedger     | 2015 | Driedger MR, Dixon E, Mohamed R, Sutherland FR, Bathe OF, Ball CG. The diagnostic pathway for solid pancreatic neoplasms: are we applying too many tests?. <i>Journal of Surgical Research</i> . 2015 Nov 1;199(1):39-43.                                         |
| 19. | Eddy         | 2015 | Eddy K, Beaton A, Eddy R, Mathieson J. ACR Select identifies inappropriate underutilization of magnetic resonance imaging in British Columbia. <i>Canadian Association of Radiologists Journal</i> . 2015 Aug 1;66(3):208-11.                                     |

| No. | First Author | Year | Full Citation or Source                                                                                                                                                                                                                                                                                                                                                                                    |
|-----|--------------|------|------------------------------------------------------------------------------------------------------------------------------------------------------------------------------------------------------------------------------------------------------------------------------------------------------------------------------------------------------------------------------------------------------------|
| 20. | Enns         | 2014 | Enns E, Rhemtulla R, Ewa V, Fruetel K, Holroyd-Leduc JM. A controlled quality improvement trial to reduce the use of physical restraints in older hospitalized adults. <i>Journal of the American Geriatrics Society</i> . 2014 Mar;62(3):541-5.                                                                                                                                                           |
| 21. | Erivwo       | 2018 | Erivwo P, Ghosh C. Atypia of undetermined significance in thyroid fine-needle aspirations: follow-up and outcome experience in Newfoundland, Canada. <i>Acta Cytologica</i> . 2018;62(2):85-92.                                                                                                                                                                                                            |
| 22. | Fischler     | 2016 | Fischler I, Riahi S, Stuckey MI, Klassen PE. Implementation of a clinical practice guideline for schizophrenia in a specialist mental health center: an observational study. <i>BMC Health Services Research</i> . 2016 Dec;16(1):372.                                                                                                                                                                     |
| 23. | Funk         | 2017 | Funk M, Fennie KP, Stephens KE, May JL, Winkler CG, Drew BJ, et al. Association of implementation of practice standards for electrocardiographic monitoring with nurses' knowledge, quality of care, and patient outcomes: findings from the Practical Use of the Latest Standards of Electrocardiography (PULSE) Trial. <i>Circulation: Cardiovascular Quality and Outcomes</i> . 2017 Feb;10(2):e003132. |
| 24. | Gaspar       | 2019 | Gaspar FW, Zaidel CS, Dewa CS. Rates and determinants of use of pharmacotherapy and psychotherapy by patients with major depressive disorder. <i>Psychiatr Serv</i> . 2019 Apr 1;70(4):262-270.                                                                                                                                                                                                            |
| 25. | Gill         | 2017 | Gill PJ, Saunders N, Gandhi S, Gonzalez A, Kurdyak P, Vigod S, et al. Emergency department as a first contact for mental health problems in children and youth. <i>Journal of the American Academy of Child &amp; Adolescent Psychiatry</i> . 2017 Jun 1;56(6):475-82.                                                                                                                                     |
| 26. | Gilmour      | 2017 | Gilmour JA, Weisman A, Orlov S, Goldberg RJ, Goldberg A, Baranek H, et al. Promoting resource stewardship: reducing inappropriate free thyroid hormone testing. <i>Journal of Evaluation in Clinical Practice</i> . 2017 Jun;23(3):670-5.                                                                                                                                                                  |
| 27. | Goodman      | 2010 | Goodman SG, Langer A, Bastien NR, McPherson R, Francis GA, Genest JJ Jr, et al. Prevalence of dyslipidemia in statin-treated patients in Canada: results of the DYSlipidemia International Study (DYSIS). <i>Can J Cardiol</i> . 2010;26(9):e330-5.                                                                                                                                                        |
| 28. | Gottheil     | 2016 | Gottheil S, Khemani E, Copley K, Keeney M, Kinney J, Chin-Yee I, et al. Reducing inappropriate ESR testing with computerized clinical decision support. <i>BMJ Open Quality</i> . 2016 Jan 1;5(1):u211376-w4582.                                                                                                                                                                                           |
| 29. | Goyal        | 2020 | Goyal UD, Riegert K, Davuluri R, Ong S, Yi SK, Dougherty ST, et al. Prospective study of use of Edmonton Symptom Assessment Scale versus routine symptom                                                                                                                                                                                                                                                   |

| No. | First Author | Year | Full Citation or Source                                                                                                                                                                                                                                                                                                          |
|-----|--------------|------|----------------------------------------------------------------------------------------------------------------------------------------------------------------------------------------------------------------------------------------------------------------------------------------------------------------------------------|
|     |              |      | management during weekly radiation treatment visits. <i>JCO Oncol Pract.</i> 2020 Sep;16(9):e1029-e1035.                                                                                                                                                                                                                         |
| 30. | Gresham      | 2019 | Gresham LM, Sadiq M, Gresham G, McGrath M, Lacelle K, Szeto M, Trickett J, Schramm D, Pearsall E, McKenzie M, McLeod R. Evaluation of the effectiveness of an enhanced recovery after surgery program using data from the National Surgical Quality Improvement Program. <i>Canadian Journal of Surgery.</i> 2019 Jun;62(3):175. |
| 31. | Habashi      | 2019 | Habashi R, Coates A, Engels PT. Selective nonoperative management of penetrating abdominal trauma at a level 1 Canadian trauma centre: a quest for perfection. <i>Can J Surg.</i> 2019 Oct 1;62(5):347-355.                                                                                                                      |
| 32. | Holowachuk   | 2019 | Holowachuk S, Zhang W, Gandhi SK, Anis AH, Potts JE, Harris KC. Cost savings analysis of early extubation following congenital heart surgery. <i>Pediatr Cardiol.</i> 2019 Jan;40(1):138-146.                                                                                                                                    |
| 33. | Kandiah      | 2020 | Kandiah JW, Chan VWY, Luo J, Dong F, Nugent JP, Forster BB. Reducing the volume of low-value outpatient MRI joint examinations in patients $\geq 55$ years of age. <i>Can Assoc Radiol J.</i> 2020 Feb;71(1):83-91.                                                                                                              |
| 34. | Kasymjanova  | 2017 | Kasymjanova G, Small D, Cohen V, Jagoe RT, Batist G, Sateren W, et al. Lung cancer care trajectory at a Canadian centre: an evaluation of how wait times affect clinical outcomes. <i>Current Oncology.</i> 2017 Oct;24(5):302.                                                                                                  |
| 35. | Kennedy      | 2014 | Kennedy SA, Fung W, Malik A, Farrokhyar F, Midia M. Effect of governmental intervention on appropriateness of lumbar MRI referrals: a Canadian experience. <i>Journal of the American College of Radiology.</i> 2014 Aug 1;11(8):802-7.                                                                                          |
| 36. | Kindrachuk   | 2014 | Kindrachuk DR, Fourney DR. Spine surgery referrals redirected through a multidisciplinary care pathway: effects of nonsurgeon triage including MRI utilization: Presented at the 2013 Joint Spine Section Meeting. <i>Journal of Neurosurgery: Spine.</i> 2014 Jan 1;20(1):87-92.                                                |
| 37. | Kolla        | 2009 | Kolla NJ, Links PS, McMain S, Streiner DL, Cardish R, Cook M. Demonstrating adherence to guidelines for the treatment of patients with borderline personality disorder. <i>The Canadian Journal of Psychiatry.</i> 2009 Mar;54(3):181-9.                                                                                         |
| 38. | Kumar        | 2019 | Kumar R, Lowe J, Thompson-Hutchison F, Steinberg D, Shah B, Lipscombe L, et al. Implementation and evaluation of the "metformin first" protocol for management of gestational diabetes. <i>Can J Diabetes.</i> 2019 Dec;43(8):554-559.                                                                                           |

| No. | First Author | Year | Full Citation or Source                                                                                                                                                                                                                                                                                                    |
|-----|--------------|------|----------------------------------------------------------------------------------------------------------------------------------------------------------------------------------------------------------------------------------------------------------------------------------------------------------------------------|
| 39. | Lieberman    | 2018 | Lieberman L, Lin Y, Cserti-Gazdewich C, Yi QL, Pendergrast J, Lau W, et al. Utilization of frozen plasma, cryoprecipitate, and recombinant factor VIIa for children with hemostatic impairments: an audit of transfusion appropriateness. <i>Pediatric Blood &amp; Cancer</i> . 2018 Apr;65(4):e26933.                     |
| 40. | Liu          | 2019 | Liu J, Pavenski K, Sholzberg M. Appropriateness of intravenous immunoglobulin use in immune thrombocytopenia (ITP): A Canadian centre deep dive audit. <i>Transfus Apher Sci</i> . 2019 Aug;58(4):491-494.                                                                                                                 |
| 41. | Lombardi     | 2020 | Lombardi J, Nguy P, Robichaud Ducharme A, Thompson-Desormeaux F, Ruo N, Girard G, et al. Assessment of surgical antibiotic prophylaxis compliance in pediatrics: a pre-post quasi-experimental study. <i>Pediatr Infect Dis J</i> . 2020 Jan;39(1):48-53.                                                                  |
| 42. | Loovere      | 2008 | Loovere L, Boyle EM, Blatz S, Bowslaugh M, Kereliuk M, Paes B. Quality improvement in radiography in a neonatal intensive care unit. <i>Can Assoc Radiol J</i> . 2008 Oct;59(4):197-202.                                                                                                                                   |
| 43. | Lundine      | 2010 | Lundine KM, Nelson S, Buckley R, Putnis S, Duffy PJ. Adherence to perioperative antibiotic prophylaxis among orthopedic trauma patients. <i>Canadian Journal of Surgery</i> . 2010 Dec;53(6):367.                                                                                                                          |
| 44. | MacLean      | 2020 | MacLean S, Corsi DJ, Litchfield S, Kucharski J, Genise K, Selaman Z, et al. Coach-facilitated web-based therapy compared with information about web-based resources in patients referred to secondary mental health care for depression: randomized controlled trial. <i>J Med Internet Res</i> . 2020 Jun 9;22(6):e15001. |
| 45. | MacMillan    | 2019 | MacMillan KM, MacInnis M, Fitzpatrick E, Hurley KF, MacPhee S, Matheson K, et al. Evaluation of a pharmacist-led antimicrobial stewardship service in a pediatric emergency department. <i>Int J Clin Pharm</i> . 2019 Dec;41(6):1592-1598.                                                                                |
| 46. | Majumdar     | 2011 | Majumdar SR, Johnson JA, Bellerose D, McAlister FA, Russell AS, Hanley DA, et al. Nurse case-manager vs multifaceted intervention to improve quality of osteoporosis care after wrist fracture: randomized controlled pilot study. <i>Osteoporosis International</i> . 2011 Jan 1;22(1):223-30.                            |
| 47. | Manta        | 2019 | Manta A, O'Grady J, Bleakney R, Theodoropoulos J. Determining the appropriateness of requests for outpatient magnetic resonance imaging of the hip. <i>Canadian Journal of Surgery</i> . 2019 Aug;62(4):224.                                                                                                               |

| No. | First Author | Year | Full Citation or Source                                                                                                                                                                                                                                                                               |
|-----|--------------|------|-------------------------------------------------------------------------------------------------------------------------------------------------------------------------------------------------------------------------------------------------------------------------------------------------------|
| 48. | Marin        | 2020 | Marin H, Mayo P, Thai V, Dersch-Mills D, Ling S, Folkman F, et al. The impact of palliative care consults on deprescribing in palliative cancer patients. <i>Support Care Cancer</i> . 2020 Sep;28(9):4107-4113.                                                                                      |
| 49. | McAlister    | 2018 | McAlister FA, Garrison S, Kosowan L, Ezekowitz JA, Singer A. Use of direct oral anticoagulants in Canadian primary care practice 2010–2015: a cohort study from the Canadian Primary Care Sentinel Surveillance Network. <i>Journal of the American Heart Association</i> . 2018 Jan 26;7(3):e007603. |
| 50. | Mertz        | 2010 | Mertz D, Dafoe N, Walter SD, Brazil K, Loeb M. Effect of a multifaceted intervention on adherence to hand hygiene among healthcare workers: a cluster-randomized trial. <i>Infection Control &amp; Hospital Epidemiology</i> . 2010 Nov;31(11):1170-6.                                                |
| 51. | Miloslavsky  | 2017 | Miloslavsky M, Galler MF, Moawad I, Actis J, Cummings BM, El Saleeby CM. The impact of pediatric-specific vancomycin dosing guidelines: a quality improvement initiative. <i>Pediatrics</i> . 2017 Jun 1;139(6):e20162423.                                                                            |
| 52. | Narkewicz    | 2009 | Narkewicz MR, Olio DD, Karpen SJ, Murray KF, Schwarz K, Yazigi N, et al. Pattern of diagnostic evaluation for the causes of pediatric acute liver failure: an opportunity for quality improvement. <i>The Journal of Pediatrics</i> . 2009 Dec 1;155(6):801-6.                                        |
| 53. | Narula       | 2014 | Narula N, Ulic D, Al-Dabbagh R, Ibrahim A, Mansour M, Balion C, et al. Fecal occult blood testing as a diagnostic test in symptomatic patients is not useful: a retrospective chart review. <i>Canadian Journal of Gastroenterology and Hepatology</i> . 2014;28(8):421-6.                            |
| 54. | Nguyen       | 2017 | Nguyen GC, Murthy SK, Bressler B, Lam MC, Alali A, Toumi A, et al. Quality of care and outcomes among hospitalized inflammatory bowel disease patients: a multicenter retrospective study. <i>Inflammatory Bowel Diseases</i> . 2017 Mar 21;23(5):695-701.                                            |
| 55. | Orser        | 2020 | Orser L, O’Byrne P, Bourgault A, Scherling N. Development of an algorithm to facilitate the clinical management of syphilis. <i>J Am Assoc Nurse Pract</i> . 2020 Feb 20. [Epub ahead of print]                                                                                                       |
| 56. | Passos       | 2012 | Passos EM, Engels PT, Doyle JD, Beckett A, Nascimento Jr B, Rizoli SB, et al. Societal costs of inappropriate emergency department thoracotomy. <i>Journal of the American College of Surgeons</i> . 2012 Jan 1;214(1):18-25.                                                                         |
| 57. | Petscavage   | 2010 | Petscavage J, Baker SR, Clarkin K, Luk L. Overuse of concomitant foot radiographic series in patients sustaining minor ankle injuries. <i>Emergency Radiology</i> . 2010 Jul 1;17(4):261-5.                                                                                                           |

| No. | First Author | Year | Full Citation or Source                                                                                                                                                                                                                                                                                                          |
|-----|--------------|------|----------------------------------------------------------------------------------------------------------------------------------------------------------------------------------------------------------------------------------------------------------------------------------------------------------------------------------|
| 58. | Poon         | 2016 | Poon S, Algethami A, Ross H, Bhatia R, Levitt K. A quality improvement initiative to decrease the inappropriate use of transthoracic echocardiograms in heart failure outpatients. <i>Journal of the American College of Cardiology</i> . 2016 Apr 5;67(13 Supplement):1642.                                                     |
| 59. | Poon         | 2018 | Poon E, Self L, McLeod SL, Caine S, Borgundvaag B. Uncomplicated urinary tract infections in the emergency department: a review of local practice patterns. <i>Canadian Journal of Emergency Medicine</i> . 2018 Jul;20(4):572-7.                                                                                                |
| 60. | Robertson    | 2019 | Robertson CMT, Bork KT, Tawfik G, Bond GY, Henderson L, Dinu IA, et al. Avoiding furosemide ototoxicity associated with single-ventricle repair in young infants. <i>Pediatr Crit Care Med</i> . 2019 Apr;20(4):350-356.                                                                                                         |
| 61. | Rolnitsky    | 2019 | Rolnitsky A, Ng E, Asztalos E, Shama Y, Karol D, Findlater C, et al. Quality improvement intervention to reduce necrotizing enterocolitis in premature infants with probiotic supplementation. <i>Pediatr Qual Saf</i> . 2019 Sep 9;4(5):e201.                                                                                   |
| 62. | Shih         | 2015 | Shih AW, Kolesar E, Ning S, Manning N, Arnold DM, Crowther MA. Evaluation of the appropriateness of frozen plasma usage after introduction of prothrombin complex concentrates: a retrospective study. <i>Vox Sanguinis</i> . 2015 Apr;108(3):274-80.                                                                            |
| 63. | Sin          | 2010 | Sin O, Brown G, Grant G. Appropriateness of adrenocorticotrophic hormone stimulation test for critically ill patients. <i>The Canadian Journal of Hospital Pharmacy</i> . 2010 Jan;63(1):9.                                                                                                                                      |
| 64. | Spence       | 2018 | Spence J, Belley-Côté E, Devereaux PJ, Whitlock R, Um K, McClure G, et al. Benzodiazepine administration during adult cardiac surgery: a survey of current practice among Canadian anesthesiologists working in academic centres. <i>Canadian Journal of Anesthesia/Journal Canadien d'Anesthésie</i> . 2018 Mar 1;65(3):263-71. |
| 65. | Spradbrow    | 2017 | Spradbrow J, Lin Y, Shelton D, Callum J. Iron deficiency anemia in the emergency department: over-utilization of red blood cell transfusion and infrequent use of iron supplementation. <i>Canadian Journal of Emergency Medicine</i> . 2017 May;19(3):167-74.                                                                   |
| 66. | Tajmir       | 2017 | Tajmir AS, Ip IK, Andruchow J, Silveira P, Smith S, Khorasani R. Impact of clinical decision support on radiography for acute ankle injuries: a randomized trial. <i>Western Journal of Emergency Medicine</i> . 2017 Apr;18(3):487.                                                                                             |
| 67. | Turner       | 2018 | Turner SR, Seyednejad N, Nasir BS. Patterns of practice in mediastinal lymph node staging for non-small cell lung cancer in Canada. <i>The Annals of Thoracic Surgery</i> . 2018 Aug 1;106(2):428-34.                                                                                                                            |

| No. | First Author | Year | Full Citation or Source                                                                                                                                                                 |
|-----|--------------|------|-----------------------------------------------------------------------------------------------------------------------------------------------------------------------------------------|
| 68. | Watt         | 2014 | Watt J, Thompson A, Le Riche N, Pope J. There is still a care gap in osteoporosis management for patients with rheumatoid arthritis. <i>Joint Bone Spine</i> . 2014 Jul 1;81(4):347-51. |

### Wrong timeframe (n = 140)

| No. | First Author | Year | Full Citation or Source                                                                                                                                                                                                                                                                          |
|-----|--------------|------|--------------------------------------------------------------------------------------------------------------------------------------------------------------------------------------------------------------------------------------------------------------------------------------------------|
| 1.  | Abdel-Malek  | 2008 | Abdel-Malek N, Chiarelli AM, Sloan M, Stewart DE, Mai V, Howlett RI. Influence of physician and patient characteristics on adherence to breast cancer screening recommendations. <i>European Journal of Cancer Prevention</i> . 2008 Feb 1;17(1):48-53.                                          |
| 2.  | Abdelmoneim  | 2013 | Abdelmoneim AS, Eurich DT, Gamble JM, Simpson SH. Use patterns of antidiabetic regimens by patients with type 2 diabetes. <i>Canadian Journal of Diabetes</i> . 2013 Dec 1;37(6):394-400.                                                                                                        |
| 3.  | Akator       | 2020 | Akator AE, Blais C, Gamache P, Lunghi C, Guénette L. Exposure to guideline-recommended drugs after a first acute myocardial infarction in older adults: does deprivation matter?. <i>Pharmacoepidemiology and Drug Safety</i> . 2020 Feb;29(2):141-9.                                            |
| 4.  | Akbari       | 2012 | Akbari A, Grimshaw J, Stacey D, Hogg W, Ramsay T, Cheng-Fitzpatrick M, et al. Change in appropriate referrals to nephrologists after the introduction of automatic reporting of the estimated glomerular filtration rate. <i>CMAJ</i> . 2012 Mar 20;184(5):E269-76.                              |
| 5.  | Alport       | 2008 | Alport EC, Callum JL, Nahirniak S, Eurich B, Hume HA. Cryoprecipitate use in 25 Canadian hospitals: commonly used outside of the published guidelines. <i>Transfusion</i> . 2008 Oct;48(10):2122-7.                                                                                              |
| 6.  | Amed         | 2013 | Amed S, Nuernberger K, McCrea P, Reimer K, Krueger H, Aydede SK, et al. Adherence to clinical practice guidelines in the management of children, youth, and young adults with type 1 diabetes—a prospective population cohort study. <i>The Journal of Pediatrics</i> . 2013 Aug 1;163(2):543-8. |
| 7.  | Amed         | 2014 | Amed S, Nuernberger K, Reimer K, Krueger H, Aydede SK, Ayers D, et al. Care delivery in youth with type 2 diabetes—are we meeting clinical practice guidelines?. <i>Pediatric Diabetes</i> . 2014 Nov;15(7):477-83.                                                                              |



| No. | First Author | Year | Full Citation or Source                                                                                                                                                                                                                                                                                                                                                         |
|-----|--------------|------|---------------------------------------------------------------------------------------------------------------------------------------------------------------------------------------------------------------------------------------------------------------------------------------------------------------------------------------------------------------------------------|
| 8.  | Ammendolia   | 2007 | Ammendolia C, Côté P, Hogg-Johnson S, Bombardier C. Do chiropractors adhere to guidelines for back radiographs? a study of chiropractic teaching clinics in Canada. <i>Spine (Phila Pa 1976)</i> . 2007 Oct 15; 32(22): 2509-14.                                                                                                                                                |
| 9.  | Ansell       | 2007 | Ansell J, Hollowell J, Pengo V, Martinez-Brotons F, Caro J, Drouet L. Descriptive analysis of the process and quality of oral anticoagulation management in real-life practice in patients with chronic non-valvular atrial fibrillation: the international study of anticoagulation management (ISAM). <i>Journal of Thrombosis and Thrombolysis</i> . 2007 Apr 1;23(2):83-91. |
| 10. | Anthonisen   | 2009 | Anthonisen, NR. Editor's page: efficient anagement of cough. <i>Can Respir J</i> 2009 Mar/Apr 16(2):41-2.                                                                                                                                                                                                                                                                       |
| 11. | Arkin        | 2011 | Arkin E, Symington A. Ontario: study documents access and quality of care issues for women living with or vulnerable to HIV. <i>HIV/AIDS Policy &amp; Law Review</i> . 2011 Oct;15(3):27-8.                                                                                                                                                                                     |
| 12. | Asadi        | 2012 | Asadi L, Eurich DT, Gamble JM, Minhas-Sandhu JK, Marrie TJ, Majumdar SR. Guideline adherence and macrolides reduced mortality in outpatients with pneumonia. <i>Respiratory Medicine</i> . 2012 Mar 1;106(3):451-8.                                                                                                                                                             |
| 13. | Asadi        | 2013 | Asadi L, Eurich DT, Gamble JM, Minhas-Sandhu JK, Marrie TJ, Majumdar SR. Impact of guideline-concordant antibiotics and macrolide/β-lactam combinations in 3203 patients hospitalized with pneumonia: prospective cohort study. <i>Clinical Microbiology and Infection</i> . 2013 Mar 1;19(3):257-64.                                                                           |
| 14. | Atkins       | 2008 | Atkins EJ, Drews-Botsch CD, Newman NJ, Calvetti O, Swanson S, Biousse V. Management of optic neuritis in Canada: survey of ophthalmologists and neurologists. <i>Canadian Journal of Neurological Sciences</i> . 2008 May;35(2):179-84.                                                                                                                                         |
| 15. | Atzema       | 2008 | Atzema CL, Schull MJ. ALaRMED: adverse events in low-risk chest pain patients receiving continuous ECG monitoring in the emergency department: a survey of Canadian emergency physicians. <i>Canadian Journal of Emergency Medicine</i> . 2008 Sep;10(5):413-9.                                                                                                                 |
| 16. | Bagai        | 2017 | Bagai A, Eberg M, Koh M, Cheema AN, Yan AT, Dhoot A, et al. Population-based study on patterns of cardiac stress testing after percutaneous coronary intervention. <i>Circulation: Cardiovascular Quality and Outcomes</i> . 2017 Oct;10(10):e003660.                                                                                                                           |
| 17. | Baines       | 2016 | Baines CJ, To T, Miller AB. Revised estimates of overdiagnosis from the canadian national breast screening study. <i>Preventive Medicine</i> . 2016 Sep 1;90:66-71.                                                                                                                                                                                                             |
| 18. | Bartsch      | 2013 | Bartsch JA, Teare GF, Neufeld A, Hudema N, Muhajarine N. Secondary prevention of stroke in Saskatchewan, Canada: hypertension control. <i>International Journal of Stroke</i> . 2013 Oct;8(SA100):32-8.                                                                                                                                                                         |

| No. | First Author | Year | Full Citation or Source                                                                                                                                                                                                                                                                                                                   |
|-----|--------------|------|-------------------------------------------------------------------------------------------------------------------------------------------------------------------------------------------------------------------------------------------------------------------------------------------------------------------------------------------|
| 19. | Beaulieu     | 2008 | Beaulieu M, Krajden M, Buxton J, Er L, Djurdjev O, Levin A. Variability of hepatitis B testing in British Columbian ESRD patients: the case to focus on implementation of guidelines. <i>American Journal of Kidney Diseases</i> . 2008 Nov 1;52(5):939-46.                                                                               |
| 20. | Beckett      | 2018 | Beckett M, Firestone MA, McKnight CD, Smylie J, Rotondi MA. A cross-sectional analysis of the relationship between diabetes and health access barriers in an urban First Nations population in Canada. <i>BMJ Open</i> . 2018 Jan 1;8(1):e018272.                                                                                         |
| 21. | Berard       | 2007 | Berard R, Matsui D, Lynch T. Screening for iron deficiency anemia in at risk children in the pediatric emergency department: a survey of Canadian pediatric emergency department physicians. <i>Pediatric Emergency Care</i> . 2007 May 1;23(5):281-4.                                                                                    |
| 22. | Beres        | 2013 | Beres AL, Puligandla PS, Brindle ME. Stability prior to surgery in congenital diaphragmatic hernia: is it necessary? <i>Journal of Pediatric Surgery</i> . 2013 May 1;48(5):919-23.                                                                                                                                                       |
| 23. | Blais        | 2008 | Blais R, Laurier C, Paré M. Effect of feedback letters to physicians and pharmacists on the appropriate use of medication in the treatment of asthma. <i>Journal of Asthma</i> . 2008 Jan 1;45(3):227-31.                                                                                                                                 |
| 24. | Black        | 2015 | Black E, Sketris I, Skedgel C, MacLean E, Hanly JG. Adherence to guidelines and the screening tool of older persons' potentially inappropriate prescriptions criteria for colchicine dosing for gout treatment in beneficiaries of the Nova Scotia Seniors' Pharmacare Program. <i>Clinical Therapeutics</i> . 2015 Oct 1;37(10):2339-46. |
| 25. | Black        | 2020 | Black CD, Thavorn K, Coyle D, Bjerre LM. The health system costs of potentially inappropriate prescribing: a population-based, retrospective cohort study using linked health administrative databases in Ontario, Canada. <i>PharmacoEconomics-open</i> . 2020 Mar;4(1):27-36.                                                           |
| 26. | Boulanger    | 2007 | Boulanger A, Clark AJ, Squire P, Cui E, Horbay GL. Chronic pain in Canada: have we improved our management of chronic noncancer pain? <i>Pain Research and Management</i> . 2007;12(1):39-47.                                                                                                                                             |
| 27. | Bradley      | 2015 | Bradley SM, Chan PS, Hartigan PM, Nallamotheu BK, Weintraub WS, Sedlis SP, et al. Validation of the appropriate use criteria for percutaneous coronary intervention in patients with stable coronary artery disease (from the COURAGE trial). <i>The American Journal of Cardiology</i> . 2015 Jul 15;116(2):167-73.                      |
| 28. | Brauer       | 2012 | Brauer PM, Sergeant LA, Davidson B, Goy R, Dietrich L. Patient reports of: lifestyle advice in primary care. <i>Canadian Journal of Dietetic Practice and Research</i> . 2012 Sep;73(3):122-7.                                                                                                                                            |

| No. | First Author | Year | Full Citation or Source                                                                                                                                                                                                                                                                                          |
|-----|--------------|------|------------------------------------------------------------------------------------------------------------------------------------------------------------------------------------------------------------------------------------------------------------------------------------------------------------------|
| 29. | Breakey      | 2007 | Breakey VR, Pirie J, Goldman RD. Pediatric and emergency medicine residents' attitudes and practices for analgesia and sedation during lumbar puncture in pediatric patients. <i>Pediatrics</i> . 2007 Mar 1;119(3):e631-6.                                                                                      |
| 30. | Bronskill    | 2012 | Bronskill SE, Gill SS, Paterson JM, Bell CM, Anderson GM, Rochon PA. Exploring variation in rates of polypharmacy across long term care homes. <i>Journal of the American Medical Directors Association</i> . 2012 Mar 1;13(3):309-e15.                                                                          |
| 31. | Carter       | 2019 | Carter JH, Sketris I, Tamim H, Levy AR, Langley JM. Determining proton pump inhibitor prescription dispensing patterns and adherence to STOPP criteria for Nova Scotia Seniors Pharmacare Program beneficiaries. <i>Journal of Population Therapeutics and Clinical Pharmacology</i> . 2019 Dec 27;26(4):e37-51. |
| 32. | Chami        | 2017 | Chami N, Simons JE, Sweetman A, Don-Wauchope AC. Rates of inappropriate laboratory test utilization in Ontario. <i>Clinical Biochemistry</i> . 2017 Oct 1;50(15):822-7.                                                                                                                                          |
| 33. | Chapman      | 2008 | Chapman KR, Boulet LP, Rea RM, Franssen E. Suboptimal asthma control: prevalence, detection and consequences in general practice. <i>European Respiratory Journal</i> . 2008 Feb 1;31(2):320-5.                                                                                                                  |
| 34. | Chedeville   | 2007 | Chédeville G, Scuccimarri R, Duffy CM. Survey on the use of methotrexate by pediatric rheumatologists in Canada. <i>The Journal of Rheumatology</i> . 2007 Apr 1;34(4):818-22.                                                                                                                                   |
| 35. | Chen         | 2010 | Chen SY, Hansen RA, Gaynes BN, Farley JF, Morrissey JP, Maciejewski ML. Guideline-concordant antidepressant use among patients with major depressive disorder. <i>General Hospital Psychiatry</i> . 2010 Jul 1;32(4):360-7.                                                                                      |
| 36. | Cheung       | 2008 | Cheung A, Sacks D, Dewa CS, Pong J, Levitt A. Pediatric prescribing practices and the FDA black-box warning on antidepressants. <i>Journal of Developmental &amp; Behavioral Pediatrics</i> . 2008 Jun 1;29(3):213-5.                                                                                            |
| 37. | Cheung       | 2018 | Cheung MC, Mittmann N, Earle CC, Rahman F, Liu N, Singh S. Are we choosing wisely in lymphoma? excessive use of surveillance CT imaging in patients with diffuse large B-cell lymphoma (DLBCL) in long-term remission. <i>Clinical Lymphoma Myeloma and Leukemia</i> . 2018 Jan 1;18(1):e27-34.                  |
| 38. | Chornenki    | 2018 | Chornenki NL, Chai-Adisaksopha C, Leong DP, Siegal DM, Hillis CM. The real-world outcomes of treating polycythemia vera: physician adherence to treatment guidelines. <i>Leukemia Research</i> . 2018 Jul 1;70:62-6.                                                                                             |

| No. | First Author    | Year | Full Citation or Source                                                                                                                                                                                                                                                                         |
|-----|-----------------|------|-------------------------------------------------------------------------------------------------------------------------------------------------------------------------------------------------------------------------------------------------------------------------------------------------|
| 39. | Chuah           | 2010 | Chuah TK, Lee T, Wirtzfeld D, Pollett W. Management of primary rectal cancer by surgeons in Atlantic Canada: results of a regional survey. <i>Canadian Journal of Surgery</i> . 2010 Dec;53(6):396.                                                                                             |
| 40. | Constantine (a) | 2007 | Constantine E, Steele DW, Ebersson C, Boutis K, Amanullah S, Linakis JG. The use of local anesthetic techniques for closed forearm fracture reduction in children: a survey of academic pediatric emergency departments. <i>Pediatric Emergency Care</i> . 2007 Apr 1;23(4):209-11.             |
| 41. | Constantine (b) | 2007 | Constantine MM, Thomas W, Whitman L, Kahwash E, Dolan S, Smith S, et al. Intravenous immunoglobulin utilization in the Canadian Atlantic provinces: a report of the Atlantic Collaborative Intravenous Immune Globulin Utilization Working Group. <i>Transfusion</i> . 2007 Nov;47(11):2072-80. |
| 42. | Cranney         | 2008 | Cranney A, Lam M, Ruhland L, Brison R, Godwin M, Harrison MM, et al. A multifaceted intervention to improve treatment of osteoporosis in postmenopausal women with wrist fractures: a cluster randomized trial. <i>Osteoporosis International</i> . 2008 Dec 1;19(12):1733.                     |
| 43. | Curtis          | 2007 | Curtis BM, Barrett BJ, Djurdjev O, Singer J, Levin A, Group CC. Evaluation and treatment of CKD patients before and at their first nephrologist encounter in Canada. <i>American Journal of Kidney Diseases</i> . 2007 Nov 1;50(5):733-42.                                                      |
| 44. | Dahrouge        | 2012 | Dahrouge S, Hogg WE, Russell G, Tuna M, Geneau R, Muldoon LK, et al. Impact of remuneration and organizational factors on completing preventive manoeuvres in primary care practices. <i>CMAJ</i> . 2012 Feb 7;184(2):E135-43.                                                                  |
| 45. | Dalby           | 2008 | Dalby DM, Hirdes JP, Hogan DB, Patten SB, Beck CA, Rabinowitz T, et al. Potentially inappropriate management of depressive symptoms among Ontario home care clients. <i>International Journal of Geriatric Psychiatry</i> . 2008 Jun;23(6):650-9.                                               |
| 46. | Debessai        | 2016 | Debessai Y, Costanian C, Roy M, El-Sayed M, Tamim H. Inadequate prenatal care use among Canadian mothers: findings from the maternity experiences survey. <i>Journal of Perinatology</i> . 2016 Jun;36(6):420-6.                                                                                |
| 47. | deGara          | 2007 | de Gara C. How evidence-based are CAGS surgeons really? <i>Canadian Journal of Surgery</i> . 2007 Apr;50(2):90.                                                                                                                                                                                 |
| 48. | Dennehy         | 2007 | Dennehy EB, Bauer MS, Perlis RH, Kogan JN, Sachs GS. Concordance with treatment guidelines for bipolar disorder: data from the systematic treatment enhancement program for bipolar disorder. <i>Psychopharmacol Bull</i> . 2007 Jan 1;40(3):72-84.                                             |

| No. | First Author | Year | Full Citation or Source                                                                                                                                                                                                                                                                                          |
|-----|--------------|------|------------------------------------------------------------------------------------------------------------------------------------------------------------------------------------------------------------------------------------------------------------------------------------------------------------------|
| 49. | Dhalla       | 2011 | Dhalla IA, Mamdani MM, Gomes T, Juurlink DN. Clustering of opioid prescribing and opioid-related mortality among family physicians in Ontario. <i>Canadian Family Physician</i> . 2011 Mar 1;57(3):e92-6.                                                                                                        |
| 50. | Diop         | 2017 | Diop M, Fiset-Laniel J, Provost S, Tousignant P, Da Silva RB, Ouimet MJ, et al. Does enrollment in multidisciplinary team-based primary care practice improve adherence to guideline-recommended processes of care? Quebec's Family Medicine Groups, 2002–2010. <i>Health Policy</i> . 2017 Apr 1;121(4):378-88. |
| 51. | Dickson      | 2017 | Dickson C, Taljaard M, Friedman DS, Metz G, Wong T, Grimshaw JM. The antibiotic management of gonorrhoea in Ontario, Canada following multiple changes in guidelines: an interrupted time-series analysis. <i>Sexually transmitted infections</i> . 2017 Dec 1;93(8):561-5.                                      |
| 52. | Donnelly     | 2007 | Donnelly C, McColl MA, Charlifue S, Glass C, O'Brien P, Savic G, et al. Utilization, access and satisfaction with primary care among people with spinal cord injuries: a comparison of three countries. <i>Spinal Cord</i> . 2007 Jan;45(1):25.                                                                  |
| 53. | Dormuth      | 2012 | Dormuth CR, Carney G, Taylor S, Bassett K, Maclure M. A randomized trial assessing the impact of a personal printed feedback portrait on statin prescribing in primary care. <i>Journal of Continuing Education in the Health Professions</i> . 2012 Jun;32(3):153-62.                                           |
| 54. | Dowling      | 2011 | Dowling SK, Wishart I. Use of the Ottawa Ankle Rules in children: a survey of physicians' practice patterns. <i>Canadian Journal of Emergency Medicine</i> . 2011 Sep;13(5):333-8.                                                                                                                               |
| 55. | Duval        | 2007 | Duval M, Desrosiers M. Guidelines for management of acute bacterial rhinosinusitis: Impact on Quebec physicians' prescriptions for antibiotics. <i>Otolaryngology—Head and Neck Surgery</i> . 2007 Feb;136(2):258-60.                                                                                            |
| 56. | Eagles       | 2008 | Eagles D, Stiell IG, Clement CM, Brehaut J, Taljaard M, Kelly AM, et al. International survey of emergency physicians' awareness and use of the Canadian Cervical-Spine Rule and the Canadian Computed Tomography Head Rule. <i>Academic Emergency Medicine</i> . 2008 Dec;15(12):1256-61.                       |
| 57. | Edge         | 2007 | Edge VL, Fyfe M, MacDougall L, Majowicz SE, Doré K, Flint JA, et al. Physician diagnostic and reporting practices for gastrointestinal illnesses in three health regions of British Columbia. <i>Canadian Journal of Public Health</i> . 2007 Jul 1;98(4):306-10.                                                |
| 58. | Emery        | 2009 | Emery DJ, Forster AJ, Shojania KG, Magnan S, Tubman M, Feasby TE. Management of MRI wait lists in Canada. <i>Health Policy</i> 2009;4:76e86.                                                                                                                                                                     |

| No. | First Author | Year | Full Citation or Source                                                                                                                                                                                                                                                                                                                                                                                                                                                                                                                          |
|-----|--------------|------|--------------------------------------------------------------------------------------------------------------------------------------------------------------------------------------------------------------------------------------------------------------------------------------------------------------------------------------------------------------------------------------------------------------------------------------------------------------------------------------------------------------------------------------------------|
| 59. | Enright      | 2018 | Enright K, Desai T, Sutradhar R, Gonzalez A, Powis M, Taback N, et al. Factors associated with imaging in patients with early breast cancer after initial treatment. <i>Current Oncology</i> . 2018 Apr;25(2):126.                                                                                                                                                                                                                                                                                                                               |
| 60. | Ethier       | 2008 | Ethier J, Mendelssohn DC, Elder SJ, Hasegawa T, Akizawa T, Akiba T, et al. Vascular access use and outcomes: an international perspective from the Dialysis Outcomes and Practice Patterns Study. <i>Nephrology Dialysis Transplantation</i> . 2008 Oct 1;23(10):3219-26.                                                                                                                                                                                                                                                                        |
| 61. | Eskander     | 2015 | Eskander A, Irish JC, Urbach DR, Goldstein DP. Head and neck cancer surgery in Ontario, 2003–2010: An ICES atlas. Toronto, ON: Institute for Clinical Evaluative Sciences; 2015.                                                                                                                                                                                                                                                                                                                                                                 |
| 62. | Eskander     | 2016 | Eskander A, Monteiro E, Irish J, Gullane P, Gilbert R, de Almeida J, et al. Adherence to guideline-recommended process measures for squamous cell carcinoma of the head and neck in Ontario: impact of surgeon and hospital volume. <i>Head &amp; Neck</i> . 2016 Apr;38(S1):E1987-92.                                                                                                                                                                                                                                                           |
| 63. | Falk         | 2016 | Falk J, Dik N, Bugden S. An evaluation of early medication use for COPD: a population-based cohort study. <i>International Journal of Chronic Obstructive Pulmonary Disease</i> . 2016;11:3101.                                                                                                                                                                                                                                                                                                                                                  |
| 64. | Feasby       | 2008 | Feasby T. Comparative effectiveness and appropriateness. 2008. Available from: <a href="https://www.ihe.ca/advanced-search/comparative-effectiveness-and-appropriateness">https://www.ihe.ca/advanced-search/comparative-effectiveness-and-appropriateness</a>                                                                                                                                                                                                                                                                                   |
| 65. | Ferrusi      | 2013 | Ferrusi IL, Earle CC, Trudeau M, Leighl NB, Pullenayegum E, Khong H, et al. Closing the personalized medicine information gap: HER2 test documentation practice. <i>The American Journal of Managed Care</i> . 2013 Jan;19(1):838.                                                                                                                                                                                                                                                                                                               |
| 66. | Fiset-Lanie  | 2020 | Fiset-Laniel J, Diop M, Provost S, Strumpf EC. The impact of team-based primary care on guideline-recommended disease screening. <i>American Journal of Preventive Medicine</i> . 2020 Mar 1;58(3):407-17.                                                                                                                                                                                                                                                                                                                                       |
| 67. | Fitzgerald   | 2017 | FitzGerald JM, Tavakoli H, Lynd LD, Al Efraij K, Sadatsafavi M. The impact of inappropriate use of short acting beta agonists in asthma. <i>Respiratory Medicine</i> . 2017 Oct 1;131:135-40.                                                                                                                                                                                                                                                                                                                                                    |
| 68. | Fletcher     | 2012 | Fletcher J, Hogg W, Farrell B, Woodend K, Dahrouge S, Lemelin J, et al. Effect of nurse practitioner and pharmacist counseling on inappropriate medication use in family practice. <i>Canadian Family Physician</i> . 2012 Aug 1;58(8):862-8.                                                                                                                                                                                                                                                                                                    |
| 69. | Fortin       | 2008 | Fortin A. Évaluation de la diffusion de la première série de guides cliniques en antibiothérapie et de leur appréciation par les médecins du Québec. 2008. Available from: <a href="https://www.inesss.qc.ca/nc/publications/publications/publication/evaluation-de-la-diffusion-de-la-premiere-serie-de-guides-cliniques-en-antibiotherapie-et-de-leur-ap.html">https://www.inesss.qc.ca/nc/publications/publications/publication/evaluation-de-la-diffusion-de-la-premiere-serie-de-guides-cliniques-en-antibiotherapie-et-de-leur-ap.html</a> |

| No. | First Author | Year | Full Citation or Source                                                                                                                                                                                                                                            |
|-----|--------------|------|--------------------------------------------------------------------------------------------------------------------------------------------------------------------------------------------------------------------------------------------------------------------|
| 70. | Foster       | 2010 | Foster R, Suri A, Filate W, Hallett D, Meyer J, Ruijs T, et al. Use of intravenous immune globulin in the ICU: a retrospective review of prescribing practices and patient outcomes. <i>Transfusion Medicine</i> . 2010 Dec;20(6):403-8.                           |
| 71. | Graham       | 2008 | Graham SD, Hartzema AG, Sketris IS, Winterstein AG. Effect of an academic detailing intervention on the utilization rate of cyclooxygenase-2 inhibitors in the elderly. <i>Annals of Pharmacotherapy</i> . 2008 Jun;42(6):749-56.                                  |
| 72. | Grunfeld     | 2010 | Grunfeld E, Hodgson DC, Del Giudice ME, Moineddin R. Population-based longitudinal study of follow-up care for breast cancer survivors. <i>Journal of Oncology Practice</i> . 2010 Jul;6(4):174-81.                                                                |
| 73. | Harris       | 2009 | Harris KM, Pastorius CA, Duval S, Harwood E, Henry TD, Carabello BA, et al. Practice variation among cardiovascular physicians in management of patients with mitral regurgitation. <i>The American Journal of Cardiology</i> . 2009 Jan 15;103(2):255-61.         |
| 74. | Hawkins      | 2008 | Hawkins TL, Lange IR, Gibson PS. Compliance with a perinatal prophylaxis policy for prevention of venous thromboembolism after caesarean section. <i>Journal of Obstetrics and Gynaecology Canada</i> . 2008 Dec 1;30(12):1110-7.                                  |
| 75. | Henault      | 2018 | Henault D, Westley T, Dumitra S, Chang SL, Kremer R, Tamblyn R, et al. Divergence from osteoporosis screening guidelines in older breast cancer patients treated with anti-estrogen therapy: a population-based cohort study. <i>Bone</i> . 2018 Nov 1;116:94-102. |
| 76. | Hendee       | 2010 | Hendee WR, Becker GJ, Borgstede JP, Bosma J, Casarella WJ, Erickson BA, et al. Addressing overutilization in medical imaging. <i>Radiology</i> . 2010 Oct;257(1):240-5.                                                                                            |
| 77. | Holness (a)  | 2007 | Holness DL, Tabassum S, Tarlo SM, Liss GM, Silverman F, Manno M. Dermatologist and family practitioner practice patterns for occupational contact dermatitis. <i>Australasian Journal of Dermatology</i> . 2007 Feb;48(1):22-7.                                    |
| 78. | Holness (b)  | 2007 | Holness DL, Tabassum S, Tarlo SM, Liss GM, Silverman F, Manno M. Practice patterns of pulmonologists and family physicians for occupational asthma. <i>Chest</i> . 2007 Nov 1;132(5):1526-31.                                                                      |
| 79. | Howard       | 2009 | Howard J, Sommers R, Gould O, Mancuso M. Effectiveness of an HbA1c tracking tool on primary care management of diabetes mellitus: glycaemic control, clinical practice and usability. <i>Journal of Innovation in Health Informatics</i> . 2009;17(1):41-6.        |
| 80. | Huang        | 2008 | Huang C, Loewen P, Pelletier T, Slater J, Chung M. Implementation of proven interventions in general medical inpatients: development and evaluation of a new quality indicator for drug therapy. <i>BMJ Quality &amp; Safety</i> . 2008 Aug 1;17(4):269-74.        |

| No. | First Author | Year | Full Citation or Source                                                                                                                                                                                                                                                                    |
|-----|--------------|------|--------------------------------------------------------------------------------------------------------------------------------------------------------------------------------------------------------------------------------------------------------------------------------------------|
| 81. | Hudon        | 2015 | Hudon R, Langlais-Plante Y. Concurrence entre élites autour d'intérêts: le choix de l'emplacement du Centre Hospitalier de l'Université de Montréal (CHUM). <i>Canadian Public Policy</i> . 2015 Mar;41(1):35-50.                                                                          |
| 82. | Ioannidis    | 2008 | Ioannidis G, Thabane L, Gafni A, Hodsman A, Kvern B, Johnstone D, et al. Optimizing care in osteoporosis: the Canadian quality circle project. <i>BMC Musculoskeletal Disorders</i> . 2008 Dec;9(1):130.                                                                                   |
| 83. | Ioannidis    | 2009 | Ioannidis G, Papaioannou A, Thabane L, Gafni A, Hodsman A, Kvern B, et al. The utilization of appropriate osteoporosis medications improves following a multifaceted educational intervention: the Canadian quality circle project (CQC). <i>BMC Medical Education</i> . 2009 Dec;9(1):54. |
| 84. | Jaakkimainen | 2011 | Jaakkimainen RL, Barnsley J, Klein-Geltink J, Kopp A, Glazier RH. Did changing primary care delivery models change performance? A population based study using health administrative data. <i>BMC Family Practice</i> . 2011 Dec;12(1):44.                                                 |
| 85. | Janssen      | 2007 | Janssen PA, Ryan EM, Etches DJ, Klein MC, Reime B. Outcomes of planned hospital birth attended by midwives compared with physicians in British Columbia. <i>Birth</i> . 2007 Jun;34(2):140-7.                                                                                              |
| 86. | Jones        | 2008 | Jones NE, Dhaliwal R, Day AG, Ouellette-Kuntz H, Heyland DK. Factors predicting adherence to the Canadian Clinical Practice Guidelines for nutrition support in mechanically ventilated, critically ill adult patients. <i>Journal of Critical Care</i> . 2008 Sep 1;23(3):301-7.          |
| 87. | Kanaroglou   | 2015 | Kanaroglou N, To T, Zhu J, Braga LH, Wehbi E, Hajiha M, et al. Inappropriate use of ultrasound in management of pediatric cryptorchidism. <i>Pediatrics</i> . 2015 Sep 1;136(3):479-86.                                                                                                    |
| 88. | Karsanji     | 2017 | Karsanji DJ, Pannu N, Manns BJ, Hemmelgarn BR, Tan Z, Jindal K, et al. Disparity between nephrologists' opinions and contemporary practices for community follow-up after AKI hospitalization. <i>Clinical Journal of the American Society of Nephrology</i> . 2017 Nov 7;12(11):1753-61.  |
| 89. | Katz         | 2012 | Katz A, Lambert-Lanning A, Miller A, Kaminsky B, Enns J. Delivery of preventive care: the national Canadian family physician cancer and chronic disease prevention survey. <i>Canadian Family Physician</i> . 2012 Jan 1;58(1):e62-9.                                                      |
| 90. | Kawasumi     | 2011 | Kawasumi Y, Ernst P, Abrahamowicz M, Tamblyn R. Association between physician competence at licensure and the quality of asthma management among patients with out-of-control asthma. <i>Archives of Internal Medicine</i> . 2011 Jul 25;171(14):1292-4.                                   |



| No.  | First Author | Year | Full Citation or Source                                                                                                                                                                                                                                                                                          |
|------|--------------|------|------------------------------------------------------------------------------------------------------------------------------------------------------------------------------------------------------------------------------------------------------------------------------------------------------------------|
| 91.  | Kisely       | 2009 | Kisely S, Campbell LA, Wang Y. Treatment of ischaemic heart disease and stroke in individuals with psychosis under universal healthcare. <i>The British Journal of Psychiatry</i> . 2009 Dec;195(6):545-50.                                                                                                      |
| 92.  | Klil-Drori   | 2019 | Klil-Drori AJ, Yin H, Azoulay L, Del Corpo A, Harnois M, Gratton MO, et al. Molecular monitoring of therapeutic milestones and clinical outcomes in patients with chronic myeloid leukemia. <i>Cancer</i> . 2019 Feb 15;125(4):618-25.                                                                           |
| 93.  | Ko           | 2012 | Ko DT, Guo H, Wijeyesundera HC, Natarajan MK, Nagpal AD, Feindel CM, et al. Assessing the association of appropriateness of coronary revascularization and clinical outcomes for patients with stable coronary artery disease. <i>Journal of the American College of Cardiology</i> . 2012 Nov 6;60(19):1876-84. |
| 94.  | Ksienski     | 2010 | Ksienski D, Woods R, Speers C, Kennecke H. Patterns of referral and resection among patients with liver-only metastatic colorectal cancer (MCRC). <i>Annals of Surgical Oncology</i> . 2010 Dec 1;17(12):3085-93.                                                                                                |
| 95.  | Lachaine     | 2007 | Lachaine J, Gordon A, Choiniere M, Collet JP, Dion D, Tarride JE. Painful neuropathic disorders: an analysis of the Regie de l'Assurance Maladie du Quebec database. <i>Pain Research and Management</i> . 2007;12(1):31-7.                                                                                      |
| 96.  | Laprise      | 2009 | Laprise R, Thivierge R, Gosselin G, Bujas-Bobanovic M, Vandal S, Paquette D, et al. Improved cardiovascular prevention using best CME practices: a randomized trial. <i>Journal of Continuing Education in the Health Professions</i> . 2009 Dec;29(1):16-31.                                                    |
| 97.  | Lehnert      | 2010 | Lehnert BE, Bree RL. Analysis of appropriateness of outpatient CT and MRI referred from primary care clinics at an academic medical center: how critical is the need for improved decision support? <i>J Am Coll Radiol</i> . 2010 Mar;7(3):192-7.                                                               |
| 98.  | Levy         | 2020 | Levy J, Gupta V, Amirazodi E, Allen-Ayodabo C, Jivraj N, Jeong Y, et al. Textbook outcome and survival in patients with gastric cancer: an analysis of the population registry of esophageal and stomach tumours in ontario (PRESTO). <i>Annals of Surgery</i> . 2020 Mar 6.                                     |
| 99.  | Licskai      | 2012 | Licskai CJ, Sands TW, Paolatto L, Nicoletti I, Ferrone M. Spirometry in primary care: an analysis of spirometry test quality in a regional primary care asthma program. <i>Canadian Respiratory Journal</i> . 2012;19(4):249-54.                                                                                 |
| 100. | Lim          | 2012 | Lim C, Bawden J, Wing A, Villa-Roel C, Meurer DP, Bullard MJ, et al. Febrile neutropenia in EDs: the role of an electronic clinical practice guideline. <i>The American Journal of Emergency Medicine</i> . 2012 Jan 1;30(1):5-11.                                                                               |

| No.  | First Author | Year | Full Citation or Source                                                                                                                                                                                                                                                                                                                                |
|------|--------------|------|--------------------------------------------------------------------------------------------------------------------------------------------------------------------------------------------------------------------------------------------------------------------------------------------------------------------------------------------------------|
| 101. | Loeb         | 2008 | Loeb M, Hunt D, O'Halloran K, Carusone SC, Dafoe N, Walter SD. Stop orders to reduce inappropriate urinary catheterization in hospitalized patients: a randomized controlled trial. <i>Journal of General Internal Medicine</i> . 2008 Jun 1;23(6):816-20.                                                                                             |
| 102. | Lougheed     | 2009 | Lougheed MD, Garvey N, Chapman KR, Cicutto L, Dales R, Day AG, et al. Variations and gaps in management of acute asthma in Ontario emergency departments. <i>Chest</i> . 2009 Mar 1;135(3):724-36.                                                                                                                                                     |
| 103. | LookHong     | 2018 | Look Hong NJ, Cheng SY, Baxter NN, Wright FC. Melanoma patterns of care in Ontario: a call for a strategic alignment of multidisciplinary care. <i>Journal of Surgical Oncology</i> . 2018 Mar;117(4):597-617.                                                                                                                                         |
| 104. | Lu           | 2014 | Lu Y, Barkun AN, Martel M. Adherence to guidelines: a national audit of the management of acute upper gastrointestinal bleeding. The REASON registry. <i>Canadian Journal of Gastroenterology and Hepatology</i> . 2014;28(9):495-501.                                                                                                                 |
| 105. | Lyon         | 2009 | Lyon AW, Higgins T, Wesenberg JC, Tran DV, Cembrowski GS. Variation in the frequency of hemoglobin A1c (HbA1c) testing: population studies used to assess compliance with clinical practice guidelines and use of HbA1c to screen for diabetes. <i>J Diabetes Sci Technol</i> . 2009 May 1;3(3):411-7.                                                 |
| 106. | Marshall     | 2020 | Marshall DA, Ferrusi IL, Trudeau M, Leigh NB, Hoch JS, Grazziotin LR, et al. Adherence to human epidermal growth factor receptor-2 testing and adjuvant trastuzumab treatment guidelines in Ontario. <i>J Oncol Pharm Pract</i> . 2020 Mar;26(2):379-385.                                                                                              |
| 107. | Masood       | 2020 | Masood S, Woolner V, Yoon JH, Chartier LB. Checklist for Head Injury Management Evaluation Study (CHIMES): a quality improvement initiative to reduce imaging utilisation for head injuries in the emergency department. <i>BMJ Open Quality</i> . 2020 Feb 1;9(1).                                                                                    |
| 108. | McCully      | 2010 | McCully RB, Pellikka PA, Hodge DO, Araoz PA, Miller TD, Gibbons RJ. Applicability of appropriateness criteria for stress imaging: similarities and differences between stress echocardiography and single-photon emission computed tomography myocardial perfusion imaging criteria. <i>Circulation: Cardiovascular Imaging</i> . 2009 May;2(3):213-8. |
| 109. | McGowan      | 2007 | McGowan KE, Lyon ME, Loken SD, Butzner JD. Celiac disease: are endomysial antibody test results being used appropriately? <i>Clinical Chemistry</i> . 2007 Oct 1;53(10):1775-81.                                                                                                                                                                       |
| 110. | McInnes      | 2017 | McInnes MD, Nanji S, Mackillop WJ, Flemming JA, Wei X, Macdonald DB, et al. Utilization of pre-operative imaging for colon cancer: a population-based study. <i>Journal of Surgical Oncology</i> . 2017 Feb;115(2):202-7.                                                                                                                              |

| No.  | First Author                 | Year | Full Citation or Source                                                                                                                                                                                                                                                                                                                                                     |
|------|------------------------------|------|-----------------------------------------------------------------------------------------------------------------------------------------------------------------------------------------------------------------------------------------------------------------------------------------------------------------------------------------------------------------------------|
| 111. | McIntyre                     | 2007 | McIntyre LA, Hébert PC, Fergusson D, Cook DJ, Aziz A, Canadian Critical Care Trials Group. A survey of Canadian intensivists' resuscitation practices in early septic shock. <i>Critical Care</i> . 2007 Aug 1;11(4):R74.                                                                                                                                                   |
| 112. | McLennan                     | 2008 | McLennan JD, Huculak S, Sheehan D. Brief report: pilot investigation of service receipt by young children with autistic spectrum disorders. <i>Journal of Autism and Developmental Disorders</i> . 2008 Jul 1;38(6):1192-6.                                                                                                                                                 |
| 113. | Medical Advisory Secretariat | 2009 | Medical Advisory Secretariat. Community-based care for the management of type 2 diabetes: an evidence-based analysis. 2009. Available from: <a href="http://www.hqontario.ca/english/providers/program/mas/tech/reviews/pdf/rev_diabetes_comprog_20091020.pdf">http://www.hqontario.ca/english/providers/program/mas/tech/reviews/pdf/rev_diabetes_comprog_20091020.pdf</a> |
| 114. | Monette                      | 2007 | Monette J, Miller MA, Monette M, Laurier C, Boivin JF, Sourial N, et al. Effect of an educational intervention on optimizing antibiotic prescribing in long-term care facilities. <i>Journal of the American Geriatrics Society</i> . 2007 Aug;55(8):1231-5.                                                                                                                |
| 115. | Moustaqim-Barrette           | 2019 | Moustaqim-Barrette A, Spinelli JJ, Kazanjian A, Dummer TJ. Impact on immigrant screening adherence with introduction of a population-based colon screening program in Ontario, Canada. <i>Cancer Medicine</i> . 2019 Apr;8(4):1826-34.                                                                                                                                      |
| 116. | Nosyk                        | 2014 | Nosyk B, Fischer B, Sun H, Marsh DC, Kerr T, Rehm JT, et al. High levels of opioid analgesic co-prescription among methadone maintenance treatment clients in British Columbia, Canada: results from a population-level retrospective cohort study. <i>The American Journal on Addictions</i> . 2014 May;23(3):257-64.                                                      |
| 117. | Olsen                        | 2010 | Olsen SR, Long R, Tyrrell GJ, Kunimoto D. Induced sputum for the diagnosis of pulmonary tuberculosis: is it useful in clinical practice? <i>Canadian Respiratory Journal</i> . 2010;17(4):e81-4.                                                                                                                                                                            |
| 118. | Oppenheimer                  | 2007 | Oppenheimer LW, Holmes P, Yang Q, Yang T, Walker M, Wen SW. Adherence to guidelines on the management of dystocia and cesarean section rates. <i>American Journal of Perinatology</i> . 2007 May;24(05):271-5.                                                                                                                                                              |
| 119. | Paquet                       | 2010 | Paquet C, Steben M. Prevention of and screening for herpes simplex infection: a survey of Quebec physicians. <i>Journal of Obstetrics and Gynaecology Canada</i> . 2010 Feb 1;32(2):126-31.                                                                                                                                                                                 |
| 120. | Préville                     | 2012 | Préville M, Bossé C, Vasiliadis HM, Voyer P, Laurier C, Berbiche D, et al. Correlates of potentially inappropriate prescriptions of benzodiazepines among older adults: results from the ESA study. <i>Canadian Journal on Aging/La Revue Canadienne du Vieillissement</i> . 2012 Sep;31(3):313-22.                                                                         |

| No.  | First Author | Year | Full Citation or Source                                                                                                                                                                                                                                                                             |
|------|--------------|------|-----------------------------------------------------------------------------------------------------------------------------------------------------------------------------------------------------------------------------------------------------------------------------------------------------|
| 121. | Pruthi       | 2010 | Pruthi D, Duerksen DR, Singh H. The practice of gastrostomy tube placement across a Canadian regional health authority. <i>American Journal of Gastroenterology</i> . 2010 Jul 1;105(7):1541-50.                                                                                                    |
| 122. | Reynolds     | 2019 | Reynolds K, Spavor M, Brandelli Y, Kwok C, Li Y, Disciglio M, et al. A comparison of two models of follow-up care for adult survivors of childhood cancer. <i>Journal of Cancer Survivorship</i> . 2019 Aug 15;13(4):547-57.                                                                        |
| 123. | Righolt      | 2020 | Righolt CH, Lagace-Wiens P, Mahmud SM. Prevalence, predictors, and consequences of inappropriate empiric antimicrobial therapy for complicated urinary tract and intra-abdominal infections in Winnipeg hospitals. <i>Diagnostic Microbiology and Infectious Disease</i> . 2020 Jan 1;96(1):114891. |
| 124. | Sewitch      | 2007 | Sewitch MJ, Fournier C, Dawes M, Yaffe M, Snell L, Roper M, et al. Do physician recommendations for colorectal cancer screening differ by patient age?. <i>Canadian Journal of Gastroenterology and Hepatology</i> . 2007;21(7):435-8.                                                              |
| 125. | Shah         | 2016 | Shah R, Li S, Stamplecoski M, Kapral MK. Low use of oral anticoagulant prescribing for secondary stroke prevention. <i>Medical Care</i> . 2016 Oct 1;54(10):907-12.                                                                                                                                 |
| 126. | Sheth        | 2017 | Sheth U, Wasserstein D, Jenkinson R, Moineddin R, Kreder H, Jaglal S. Practice patterns in the care of acute Achilles tendon ruptures: is there an association with level I evidence? <i>The Bone &amp; Joint Journal</i> . 2017 Dec;99(12):1629-36.                                                |
| 127. | Shulman      | 2009 | Shulman KI, Fischer HD, Herrmann N, Huo CY, Anderson GM, Rochon PA. Current prescription patterns and safety profile of irreversible monoamine oxidase inhibitors: a population-based cohort study of older adults. <i>The Journal of Clinical Psychiatry</i> . 2009 Dec;70(12):1681-6.             |
| 128. | Smith        | 2008 | Smith A, Carusone SC, Loeb M. Hand hygiene practices of health care workers in long-term care facilities. <i>American Journal of Infection Control</i> . 2008 Sep 1;36(7):492-4.                                                                                                                    |
| 129. | Strike       | 2007 | Strike C, Wenghofer E, Gnam W, Hillier W, Veldhuizen S, Millson M. Physician peer assessments for compliance with methadone maintenance treatment guidelines. <i>Journal of Continuing Education in the Health Professions</i> . 2007 Sep;27(4):208-13.                                             |
| 130. | Swanson      | 2008 | Swanson G, Kaczorowski J. Can you use a sequential sample of patients as a substitute for a full practice audit? study of mammography screening rates in 20 family practices in Ontario. <i>Canadian Family Physician</i> . 2008 Oct 1;54(10):1436-7.                                               |
| 131. | Taddio       | 2007 | Taddio A, Manley J, Potash L, Ipp M, Sgro M, Shah V. Routine immunization practices: use of topical anesthetics and oral analgesics. <i>Pediatrics</i> . 2007 Sep 1;120(3):e637-43.                                                                                                                 |

| No.  | First Author | Year | Full Citation or Source                                                                                                                                                                                                                                                                                                                                                                       |
|------|--------------|------|-----------------------------------------------------------------------------------------------------------------------------------------------------------------------------------------------------------------------------------------------------------------------------------------------------------------------------------------------------------------------------------------------|
| 132. | Touzet       | 2007 | Touzet S, Réfabert L, Letrilliart L, Ortolan B, Colin C. Impact of consensus development conference guidelines on primary care of bronchiolitis: are national guidelines being followed? <i>Journal of Evaluation in Clinical Practice</i> . 2007 Aug;13(4):651-6.                                                                                                                            |
| 133. | Tu           | 2009 | Tu K, Cauch-Dudek K, Chen Z. Comparison of primary care physician payment models in the management of hypertension. <i>Canadian Family Physician</i> . 2009 Jul 1;55(7):719-27.                                                                                                                                                                                                               |
| 134. | Turgeon      | 2011 | Turgeon M, Guénette L, Gaudet M, Tremblay T. Portrait de l'usage des antidépresseurs chez les adultes assurés par le régime public d'assurance médicaments du Québec. 2011. Available from: <a href="https://www.inesss.qc.ca/fileadmin/doc/CDM/Etudes/CdM-Portrait-antidepresseurs-201101.pdf">https://www.inesss.qc.ca/fileadmin/doc/CDM/Etudes/CdM-Portrait-antidepresseurs-201101.pdf</a> |
| 135. | Urquhart     | 2012 | Urquhart R, Folkes A, Porter G, Kendell C, Cox M, Dewar R, et al. Population-based longitudinal study of follow-up care for patients with colorectal cancer in Nova Scotia. <i>Journal of Oncology Practice</i> . 2012 Jul;8(4):246-52.                                                                                                                                                       |
| 136. | Waterworth   | 2008 | Waterworth PD, Soon SY, Govindraj R, Sivaprakasam R, Jackson M, Grayson AD. Factors which influence the cardiac surgeon's decision not to operate on patients referred for consideration of surgery. <i>Journal of Cardiothoracic Surgery</i> . 2008 Dec;3(1):9.                                                                                                                              |
| 137. | Wiens        | 2011 | Wiens MO, Grunau BE. Exposure to alternative healthcare providers and adherence to guidelines among patients with diabetes. <i>Canadian Journal of Diabetes</i> . 2011 Dec 1;35(5):512-7.                                                                                                                                                                                                     |
| 138. | Yanagawa     | 2015 | Yanagawa B, Ruel M, Bonneau C, Lee MM, Chung J, Al Shouli S, et al. Dual antiplatelet therapy use by Canadian cardiac surgeons. <i>The Journal of Thoracic and Cardiovascular Surgery</i> . 2015 Dec 1;150(6):1548-54.                                                                                                                                                                        |
| 139. | Yavari       | 2010 | Yavari P, Barroetavena MC, Hislop TG, Bajdik CD. Breast cancer treatment and ethnicity in British Columbia, Canada. <i>BMC Cancer</i> . 2010 Dec 1;10(1):154.                                                                                                                                                                                                                                 |
| 140. | You          | 2008 | You JJ, Purdy I, Rothwell DM, Przybysz R, Fang J, Laupacis A. Indications for and results of outpatient computed tomography and magnetic resonance imaging in Ontario. <i>Can Assoc Radiol J</i> 2008;59:135e43                                                                                                                                                                               |

### Wrong measurement (n = 41)

| No. | First Author | Year | Full Citation or Source                                                                                                                                                                                                                                                                                                            |
|-----|--------------|------|------------------------------------------------------------------------------------------------------------------------------------------------------------------------------------------------------------------------------------------------------------------------------------------------------------------------------------|
| 1.  | Arjmand      | 2017 | Arjmand P, Hurley B. Flashes and floaters: a survey of Canadian ophthalmology residents' practice patterns. <i>Canadian Journal of Ophthalmology</i> . 2017 Oct 1;52(5):453-7.                                                                                                                                                     |
| 2.  | Bhatt        | 2010 | Bhatt M, Currie GR, Christopher Auld M, Johnson DW. Current practice and tolerance for risk in performing procedural sedation and analgesia on children who have not met fasting guidelines: a Canadian survey using a stated preference discrete choice experiment. <i>Academic Emergency Medicine</i> . 2010 Nov;17(11):1207-15. |
| 3.  | Bigham       | 2010 | Bigham BL, Dainty KN, Scales DC, Morrison LJ, Brooks SC. Predictors of adopting therapeutic hypothermia for post-cardiac arrest patients among Canadian emergency and critical care physicians. <i>Resuscitation</i> . 2010 Jan 1;81(1):20-4.                                                                                      |
| 4.  | Boutis       | 2014 | Boutis K, Howard A, Constantine E, Cuomo A, Narayanan U. Evidence into practice: emergency physician management of common pediatric fractures. <i>Pediatr Emerg Care</i> 2014;30(7):462-8. 2014                                                                                                                                    |
| 5.  | Carsley      | 2018 | Carsley S, Birken CS, Tu K, Pullenayegum E, Parkin PC. Examining growth monitoring practices for children in primary care. <i>Archives of Disease in Childhood</i> . 2018 Apr 1;103(4):406-7.                                                                                                                                      |
| 6.  | Chan         | 2020 | Chan CB, Dmytruk K, Labbie M, O'Connell P. Organizational changes in diabetic foot care practices for patients at low and moderate risk after implementing a comprehensive foot care program in Alberta, Canada. <i>Journal of Foot and Ankle Research</i> . 2020 Dec;13:1-5.                                                      |
| 7.  | Chui         | 2019 | Chui J, Lavi R, Hegazy AF, Jones PM, Arellano R, Yang H, et al. Identifying barriers to the use of ultrasound in the perioperative period: a survey of southwestern Ontario anesthesiologists. <i>BMC Health Services Research</i> . 2019 Dec;19(1):214.                                                                           |
| 8.  | Davis        | 2008 | Davis PJ, Spady D, de Gara C, Forgie SE. Practices and attitudes of surgeons toward the prevention of surgical site infections: a provincial survey in Alberta, Canada. <i>Infection Control &amp; Hospital Epidemiology</i> . 2008 Dec;29(12):1164-6.                                                                             |
| 9.  | Eskicioglu   | 2012 | Eskicioglu C, Gagliardi AR, Fenech DS, Forbes SS, McKenzie M, McLeod RS, et al. Surgical site infection prevention: a survey to identify the gap between evidence and practice in University of Toronto teaching hospitals. <i>Canadian Journal of Surgery</i> . 2012 Aug;55(4):233.                                               |

| No. | First Author      | Year | Full Citation or Source                                                                                                                                                                                                                                                                                                                  |
|-----|-------------------|------|------------------------------------------------------------------------------------------------------------------------------------------------------------------------------------------------------------------------------------------------------------------------------------------------------------------------------------------|
| 10. | Feldman           | 2013 | Feldman DE, Huynh T, Des Lauriers J, Giannetti N, Frenette M, Grondin F, et al. Access to heart failure care post emergency department visit: do we meet established benchmarks and does it matter? <i>American Heart Journal</i> . 2013 May 1;165(5):725-32.                                                                            |
| 11. | Fu                | 2018 | Fu L, Kanani A, Lacuesta G, Wasserman S, Betschel S. Canadian physician survey on the medical management of hereditary angioedema. <i>Ann Allergy Asthma Immunol</i> 2018;121(5):598-603. 2018                                                                                                                                           |
| 12. | Gordon            | 2014 | Gordon KE, Do MT, Thompson W, McFaul S, all Canadian Paediatric Surveillance Program participants. Concussion management by paediatricians: a national survey of Canadian paediatricians. <i>Brain Injury</i> . 2014 Mar 1;28(3):311-7.                                                                                                  |
| 13. | Kadaoui           | 2012 | Kadaoui N, Guay M, Baron G, St-Cerny J, Lemaire J. Breast cancer screening practices for women aged 35 to 49 and 70 and older. <i>Canadian Family Physician</i> . 2012 Jan 1;58(1):e47-53.                                                                                                                                               |
| 14. | Kenny             | 2013 | Kenny K, Leung W, Stephanson K, Ross S. Clinical practice in prevention of neonatal hsv infection: a survey of obstetrical care providers in Alberta. <i>Journal of Obstetrics and Gynaecology Canada</i> . 2013 Feb 1;35(2):131-7.                                                                                                      |
| 15. | Kroft             | 2009 | Kroft J, Aneja A, Tyrwhitt J, Ternamian A. Laparoscopic peritoneal entry preferences among Canadian gynaecologists. <i>Journal of Obstetrics and Gynaecology Canada</i> . 2009 Jul 1;31(7):641-8.                                                                                                                                        |
| 16. | Lam               | 2019 | Lam K, Coomes EA, Nantel-Battista M, Kitchen J, Chan AW. Skin cancer screening after solid organ transplantation: survey of practices in Canada. <i>American Journal of Transplantation</i> . 2019 Jun;19(6):1792-7.                                                                                                                     |
| 17. | Landrigan         | 2008 | Landrigan CP, Conway PH, Stucky ER, Chiang VW, Ottolini MC. Variation in pediatric hospitalists' use of proven and unproven therapies: a study from the Pediatric Research in Inpatient Settings (PRIS) network. <i>Journal of Hospital Medicine: An Official Publication of the Society of Hospital Medicine</i> . 2008 Jul;3(4):292-8. |
| 18. | Larenas-Linnemann | 2012 | Larenas-Linnemann DE, Gupta P, Mithani S, Ponda P. Survey on immunotherapy practice patterns: dose, dose adjustments, and duration. <i>Annals of Allergy, Asthma &amp; Immunology</i> . 2012 May 1;108(5):373-8.                                                                                                                         |
| 19. | LeBlanc           | 2019 | LeBlanc K, Woo K, Bassett K, Botros M. Professionals' knowledge, attitudes, and practices related to pressure injuries in Canada. <i>Advances in Skin &amp; Wound Care</i> . 2019 May 1;32(5):228-33.                                                                                                                                    |

| No. | First Author | Year | Full Citation or Source                                                                                                                                                                                                                                                                                                                                                                    |
|-----|--------------|------|--------------------------------------------------------------------------------------------------------------------------------------------------------------------------------------------------------------------------------------------------------------------------------------------------------------------------------------------------------------------------------------------|
| 20. | Likosky      | 2010 | Likosky DS, FitzGerald DC, Groom RC, Jones DK, Baker RA, Shann KG, et al. The effect of the perioperative blood transfusion and blood conservation in cardiac surgery Clinical Practice Guidelines of the Society of Thoracic Surgeons and the Society of Cardiovascular Anesthesiologists upon clinical practices. <i>The Journal of Extra-Corporeal Technology</i> . 2010 Jun;42(2):114. |
| 21. | Machalek     | 2013 | Machalek K, Hanley BE, Kajiwara JN, Pasquali PE, Stannard CJ. Chlamydia screening practices among physicians and community nurses in Yukon, Canada. <i>International Journal of Circumpolar Health</i> . 2013 Jan 31;72(1):21607.                                                                                                                                                          |
| 22. | Mahar        | 2011 | Mahar AL, Qureshi AP, Ottensmeyer CA, Pollett A, Wright FC, Coburn NG, et al. A descriptive analysis of gastric cancer specimen processing techniques. <i>Journal of Surgical Oncology</i> . 2011 Mar 1;103(3):248-56.                                                                                                                                                                     |
| 23. | Marotta      | 2010 | Marotta P, Lucas K. Management of hepatitis B: a longitudinal national survey—impact of the Canadian Hepatitis B Consensus Guidelines. <i>Canadian Journal of Gastroenterology and Hepatology</i> . 2010;24(9):537-42.                                                                                                                                                                     |
| 24. | Mateo        | 2013 | Mateo PC, Lee KS, Barozzino M, Sgro M. Management of neonatal jaundice varies by practitioner type. <i>Canadian Family Physician</i> . 2013 Aug 1;59(8):e379-86.                                                                                                                                                                                                                           |
| 25. | Morris       | 2017 | Morris J, Nikolopoulos H, Berry T, Jain V, Vallis M, Piccinini-Vallis H, et al. Healthcare providers' gestational weight gain counselling practises and the influence of knowledge and attitudes: a cross-sectional mixed methods study. <i>BMJ Open</i> . 2017 Nov 1;7(11):e018527.                                                                                                       |
| 26. | Mukerji      | 2017 | Mukerji A, Shah PS, Shivananda S, Yee W, Read B, Minski J, et al. Survey of noninvasive respiratory support practices in Canadian neonatal intensive care units. <i>Acta Paediatrica</i> . 2017 Mar;106(3):387-93.                                                                                                                                                                         |
| 27. | Price        | 2009 | Price J, Tee R, Lam BK, Hendry P, Green MS, Rubens FD. Current use of prophylactic strategies for postoperative atrial fibrillation: a survey of Canadian cardiac surgeons. <i>The Annals of Thoracic Surgery</i> . 2009 Jul 1;88(1):106-10.                                                                                                                                               |
| 28. | Reed         | 2015 | Reed J, Pope J. A comparison between general rheumatologists and scleroderma experts with respect to following systemic sclerosis guidelines. <i>Clinical and Experimental Rheumatology</i> . 2015;33(4 Suppl 91):S40-6.                                                                                                                                                                   |
| 29. | Roberts      | 2011 | Roberts JI, Metcalfe A, Abdulla F, Wiebe S, Hanson A, Federico P, et al. Neurologists' and neurology residents' knowledge of issues related to pregnancy for women with epilepsy. <i>Epilepsy &amp; Behavior</i> . 2011 Oct 1;22(2):358-63.                                                                                                                                                |



| No. | First Author | Year | Full Citation or Source                                                                                                                                                                                                                                                                           |
|-----|--------------|------|---------------------------------------------------------------------------------------------------------------------------------------------------------------------------------------------------------------------------------------------------------------------------------------------------|
| 30. | Rowan        | 2019 | Rowan CP, Chan BCF, Jaglal SB, Catharine Craven B. Describing the current state of post-rehabilitation health system surveillance in Ontario - an invited review. <i>J Spinal Cord Med.</i> 2019 Oct;42(sup1):21-33.                                                                              |
| 31. | Richards     | 2019 | Richards CL, Malouin F, Nadeau S, Fung J, D'Amours L, Perez C, et al. Development, implementation, and clinician adherence to a standardized assessment toolkit for sensorimotor rehabilitation after stroke. <i>Physiotherapy Canada.</i> 2019 Feb 12;71(1):43-55.                               |
| 32. | Samuel       | 2013 | Samuel S, Morgan CJ, Bitzan M, Mammen C, Dart AB, Manns BJ, et al. Substantial practice variation exists in the management of childhood nephrotic syndrome. <i>Pediatric Nephrology.</i> 2013 Dec 1;28(12):2289-98.                                                                               |
| 33. | Schreuders   | 2013 | Schreuders E, Nicolaas JS, de Jonge V, van Kooten H, Soo I, Sadowski D, et al. The appropriateness of surveillance colonoscopy intervals after polypectomy. <i>Canadian Journal of Gastroenterology and Hepatology.</i> 2013;27(1):33-8.                                                          |
| 34. | Smith        | 2012 | Smith P, Hum S, Kakzanov V, Del Giudice ME, Heisey R. Physicians' attitudes and behaviour toward screening mammography in women 40 to 49 years of age. <i>Canadian Family Physician.</i> 2012 Sep 1;58(9):e508-13.                                                                                |
| 35. | Snowdon      | 2019 | Snowdon AW, Axler R, DeForge R, Pierre MS, Kolga C. Innovation procurement in health systems: exploring practice and lessons learned. <i>Healthc Q.</i> 2019 Oct;22(3):15-20.                                                                                                                     |
| 36. | Spiegel      | 2009 | Spiegel BM, Farid M, Van Oijen MG, Laine L, Howden CW, Esrailian E. Adherence to best practice guidelines in dyspepsia: a survey comparing dyspepsia experts, community gastroenterologists and primary-care providers. <i>Alimentary Pharmacology &amp; Therapeutics.</i> 2009 Apr;29(8):871-81. |
| 37. | St-Onge      | 2012 | St-Onge M, Archambault P, Lesage N, Guimont C, Poitras J, Blais R. Adherence to calcium channel blocker poisoning treatment recommendations in two Canadian cities. <i>Clinical Toxicology.</i> 2012 Jun 1;50(5):424-30.                                                                          |
| 38. | van Kooten   | 2012 | van Kooten H, de Jonge V, Schreuders E, Nicolaas JS, van Leerdam ME, Kuipers EJ, et al. Awareness of postpolypectomy surveillance guidelines: a nationwide survey of colonoscopists in Canada. <i>Canadian Journal of Gastroenterology and Hepatology.</i> 2012;26(2):79-84.                      |

| No. | First Author   | Year | Full Citation or Source                                                                                                                                                                                                                                                               |
|-----|----------------|------|---------------------------------------------------------------------------------------------------------------------------------------------------------------------------------------------------------------------------------------------------------------------------------------|
| 39. | Wiest          | 2019 | Wiest MJ, West C, Ditor D, Furlan JC, Miyatani M, Farahani F, et al. Development of cardiometabolic health indicators to advance the quality of spinal cord injury rehabilitation: SCI-high project. <i>J Spinal Cord Med.</i> 2019 Oct;42(sup1):166-175.                             |
| 40. | Williams       | 2020 | Williams S, Shulman R, Allwood Newhook LA, Power H, Guttmann A, Smith S, et al. A province wide review of transition practices for young adult patients with type 1 diabetes. <i>J Eval Clin Pract.</i> 2020 Apr 20. [Epub ahead of print]                                            |
| 41. | Yazdan-Ashoori | 2017 | Yazdan-Ashoori P, Oqab Z, McIntyre WF, Quinn KL, van Oosten E, Hopman WM, et al. How do family medicine residents choose an anticoagulation regimen for patients with nonvalvular atrial fibrillation?. <i>Primary Health Care Research &amp; Development.</i> 2017 Sep;18(5):472-81. |

#### Does not measure appropriate/inappropriate healthcare (n= 343)

| No. | First Author | Year | Full Citation or Source                                                                                                                                                                                                                                                                         |
|-----|--------------|------|-------------------------------------------------------------------------------------------------------------------------------------------------------------------------------------------------------------------------------------------------------------------------------------------------|
| 1.  | Abidi        | 2019 | Abidi SS, Rad J, Abusharekh A, Roy PC, Van Woensel W, Abidi SR, et al. AI-driven pathology laboratory utilization management via data-and knowledge-based analytics. <i>Conference on Artificial Intelligence in Medicine in Europe.</i> 2019 Jun 26:241-251.                                   |
| 2.  | Abu Fadaleh  | 2020 | Abu Fadaleh SM, Shkrobot J, Makhinova T, Eurich DT, Sadowski CA. Financial advantage or barrier when deprescribing for seniors: a case based analysis. <i>Res Social Adm Pharm.</i> 2020 Apr 2:S1551-7411(19)30947-7.                                                                           |
| 3.  | Addington    | 2020 | Addington D, Cheng CC, French P, Killackey E, Melau M, Meneghelli A, et al. International application of standards for health care quality, access and evaluation of services for early intervention in psychotic disorders. <i>Early Interv Psychiatry.</i> 2020 May 25. [Epub ahead of print] |
| 4.  | Adhikari     | 2019 | Adhikari K, Patten SB, Lee S, Metcalfe A. Adherence to and Persistence with Antidepressant Medication during Pregnancy: Does It Differ by the Class of Antidepressant Medication Prescribed? <i>Can J Psychiatry.</i> 2019 Mar;64(3):199-208.                                                   |
| 5.  | Agarwal      | 2019 | Agarwal P, Mukerji G, Desveaux L, Ivers NM, Bhattacharyya O, Hensel JM, et al. Mobile app for improved self-management of type 2 diabetes: multicenter pragmatic randomized controlled trial. <i>JMIR Mhealth Uhealth.</i> 2019 Jan 10;7(1):e10321.                                             |

| No. | First Author   | Year | Full Citation or Source                                                                                                                                                                                                                                                                          |
|-----|----------------|------|--------------------------------------------------------------------------------------------------------------------------------------------------------------------------------------------------------------------------------------------------------------------------------------------------|
| 6.  | Aird           | 2017 | Aird LN, Hong D, Gmora S, Breau R, Anvari M. The impact of a standardized program on short and long-term outcomes in bariatric surgery. <i>Surgical Endoscopy</i> . 2017 Feb 1;31(2):801-8.                                                                                                      |
| 7.  | Allen          | 2010 | Allen N, Schwartz D, Sood AR, Mendelssohn D, Verrelli M, Tanna G, et al. Perceived barriers to guidelines in peritoneal dialysis. <i>Nephrology Dialysis Transplantation</i> . 2010 Oct 19;26(5):1683-9.                                                                                         |
| 8.  | Almeida-Brasil | 2018 | Almeida-Brasil CC, Moodie EE, McLinden T, Hamelin AM, Walmsley SL, Rourke SB, et al. Medication nonadherence, multitablet regimens, and food insecurity are key experiences in the pathway to incomplete HIV suppression. <i>AIDS</i> . 2018 Jun 19;32(10):1323-32.                              |
| 9.  | Almond         | 2020 | Almond J, Leal J, Bush K, Rogers E, Henderson EA, Ellison J. Hospital-acquired <i>Clostridioides difficile</i> infections in Alberta: the validity of laboratory-identified event surveillance versus clinical infection surveillance. <i>Am J Infect Control</i> . 2020 Jun;48(6):633-637.      |
| 10. | Alzahrani      | 2010 | Alzahrani K, Gandhi R, Davis A, Mahomed N. In-hospital mortality following hip fracture care in southern Ontario. <i>Canadian Journal of Surgery</i> . 2010 Oct;53(5):294.                                                                                                                       |
| 11. | Andrade        | 2019 | Andrade JG, Mitchell LB. Periprocedural anticoagulation for cardioversion of acute onset atrial fibrillation and flutter: evidence base for current guidelines. <i>Can J Cardiol</i> . 2019 Oct;35(10):1301-1310.                                                                                |
| 12. | Armstrong      | 2008 | Armstrong D, Barkun AN, Chen Y, Daniels S, Hollingworth R, Hunt RH, et al. Access to specialist gastroenterology care in Canada: The Practice Audit in Gastroenterology (PAGE) wait times program. <i>Canadian Journal of Gastroenterology and Hepatology</i> . 2008;22(2):155-60.               |
| 13. | Armstrong      | 2011 | Armstrong D, Hollingworth R, MacIntosh D, Chen Y, Daniels S, Gittens S, et al. Point-of-care, peer-comparator colonoscopy practice audit: The Canadian Association of Gastroenterology quality program—endoscopy. <i>Canadian Journal of Gastroenterology and Hepatology</i> . 2011;25(1):13-20. |
| 14. | Bahm           | 2016 | Bahm A, Freedman SB, Guan J, Guttman A. Evaluating the impact of clinical decision tools in pediatric acute gastroenteritis: a population-based cohort study. <i>Academic Emergency Medicine</i> . 2016 May;23(5):599-609.                                                                       |
| 15. | Baker          | 2016 | Baker GR, Fancott C, Judd M, O'Connor P. Expanding patient engagement in quality improvement and health system redesign: three Canadian case studies. <i>Healthcare Management Forum</i> . 2016 Sep;29(5):176-182.                                                                               |

| No. | First Author | Year | Full Citation or Source                                                                                                                                                                                                                                                                                                          |
|-----|--------------|------|----------------------------------------------------------------------------------------------------------------------------------------------------------------------------------------------------------------------------------------------------------------------------------------------------------------------------------|
| 16. | Ball         | 2014 | Ball CG, Dixon E, MacLean AR, Kaplan GG, Nicholson L, Sutherland FR. The impact of an acute care surgery clinical care pathway for suspected appendicitis on the use of CT in the emergency department. <i>Canadian Journal of Surgery</i> . 2014 Jun;57(3):194.                                                                 |
| 17. | Ball         | 2020 | Ball CG, Murphy P, Verhoeff K, Albusadi O, Patterson M, Widder S, et al. A 30-day prospective audit of all inpatient complications following acute care surgery: How well do we really perform? <i>Can J Surg</i> . 2020 Mar 27;63(2):E150-E154.                                                                                 |
| 18. | Banerjee     | 2020 | Banerjee D, Michael J, Schmitt B, Salimnia H, Mhaisen N, Goldfarb DM, et al. multicenter clinical evaluation of the revogene strep a molecular assay for detection of streptococcus pyogenes from throat swab specimens. <i>J Clin Microbiol</i> . 2020 Jun 24;58(7):e01775-19.                                                  |
| 19. | Barata       | 2015 | Barata I, Brown KM, Fitzmaurice L, Griffin ES, Snow SK, American Academy of Pediatrics Committee on Pediatric Emergency Medicine, Emergency Nurses Association Pediatric Committee. Best practices for improving flow and care of pediatric patients in the emergency department. <i>Pediatrics</i> . 2015 Jan 1;135(1):e273-83. |
| 20. | Barlow       | 2012 | Barlow E, Aggarwal A, Johnstone J, Allen L, Kives S, Ornstein M, et al. Can paediatric and adolescent gynecological care be delivered via Telehealth?. <i>Paediatrics &amp; Child Health</i> . 2012 Feb 1;17(2):e12-5.                                                                                                           |
| 21. | Barbera      | 2017 | Barbera L, Sutradhar R, Chu A, Seow H, Earle CC, O'Brien MA, et al. Has province-wide symptom screening changed opioid prescribing rates in older patients with cancer?. <i>Journal of Oncology Practice</i> . 2017 Nov;13(11):e927-34.                                                                                          |
| 22. | Barichello   | 2019 | Barichello S, Deng L, Ismond KP, Loomes DE, Kirwin EM, Wang H, et al. Comparative effectiveness and cost-effectiveness analysis of a urine metabolomics test vs. alternative colorectal cancer screening strategies. <i>International Journal of Colorectal Disease</i> . 2019 Nov 1;34(11):1953-62.                             |
| 23. | Barrera      | 2020 | Barrera M, Hancock K, Atenafu E, Alexander S, Solomon A, Desjardins L, et al. Quality of life in pediatric oncology patients, caregivers and siblings after psychosocial screening: a randomized controlled trial. <i>Support Care Cancer</i> . 2020 Aug;28(8):3659-3668.                                                        |
| 24. | Bataineh     | 2019 | Bataineh H, Devlin RA, Barham V. Unmet health care and health care utilization. <i>Health Economics</i> . 2019 Apr;28(4):529-42.                                                                                                                                                                                                 |
| 25. | Beauchesne   | 2012 | Beauchesne LM, Therrien J, Alvarez N, Bergin L, Burggraf G, Chetaille P, et al. Structure and process measures of quality of care in adult congenital heart disease patients: a pan-Canadian study. <i>International Journal of Cardiology</i> . 2012 May 17;157(1):70-4.                                                        |

| No. | First Author    | Year | Full Citation or Source                                                                                                                                                                                                                                                                  |
|-----|-----------------|------|------------------------------------------------------------------------------------------------------------------------------------------------------------------------------------------------------------------------------------------------------------------------------------------|
| 26. | Bebb            | 2019 | Bebb DG, Agulnik J, Albadine R, Banerji S, Bigras G, Butts C, et al. Crizotinib inhibition of ROS1-positive tumours in advanced non-small-cell lung cancer: a Canadian perspective. <i>Curr Oncol</i> . 2019 Aug;26(4):e551-e557.                                                        |
| 27. | Belostotsky     | 2020 | Belostotsky V, Laing C, White DE. The sustainability of a quality improvement initiative. <i>Healthc Manage Forum</i> . 2020 Sep;33(5):195-199.                                                                                                                                          |
| 28. | Bennett         | 2018 | Bennett S, Tinnmouth A, McIsaac DI, English S, Hébert PC, Karanicolas PJ, et al. Ottawa criteria for appropriate transfusions in hepatectomy: using the RAND/UCLA appropriateness method. <i>Annals of Surgery</i> . 2018 Apr 1;267(4):766-74.                                           |
| 29. | Benson          | 2012 | Benson RC, Hardy KA, Gildengorin G, Hsia D. International survey of physician recommendation for tracheostomy for spinal muscular atrophy type I. <i>Pediatric pulmonology</i> . 2012 Jun;47(6):606-11.                                                                                  |
| 30. | Bermudez-Tamayo | 2018 | Bermúdez-Tamayo C, Johri M, Chaillet N. Budget impact of a program for safely reducing caesarean sections in Canada. <i>Midwifery</i> . 2018 May 1;60:20-6.                                                                                                                              |
| 31. | Bernier         | 2017 | Bernier R, Raj SR, Tran D, Reyes L, Sauve M, Sumner GL, et al. Assessing physician knowledge regarding indications for a primary prevention implantable defibrillator and potential barriers for referral. <i>Journal of Cardiovascular Electrophysiology</i> . 2017 Nov;28(11):1334-41. |
| 32. | Bhattacharyya   | 2011 | Bhattacharyya OK, Rasooly IR, Naqshbandi M, Estey EA, Esler J, Toth E, et al. Challenges to the provision of diabetes care in first nations communities: results from a national survey of healthcare providers in Canada. <i>BMC Health Services Research</i> . 2011 Dec;11(1):283.     |
| 33. | Birtwhistle     | 2019 | Birtwhistle R, Morissette K, Dickinson JA, Reynolds DL, Avey MT, Domingo FR, et al. Recommendation on screening adults for asymptomatic thyroid dysfunction in primary care. <i>CMAJ</i> . 2019 Nov 18;191(46):E1274-E1280.                                                              |
| 34. | Bisaillon       | 2013 | Bisaillon S, de Marcellis-Warin N, Mahfouf M, Peignier I, St-Pierre C. Survey of certain medical practices in Quebec. 2013. Available from: <a href="https://cirano.qc.ca/pdf/publication/2013RP-10.pdf">https://cirano.qc.ca/pdf/publication/2013RP-10.pdf</a>                          |
| 35. | Bogoch          | 2008 | Bogoch ER, Snowden E. A sample of Canadian orthopedic surgeons expressed willingness to participate in osteoporosis management for fragility fracture patients. <i>Canadian Journal of Surgery</i> . 2008 Feb;51(1):8.                                                                   |
| 36. | Booth           | 2012 | Booth GL, Polsky JY, Gozdyra P, Cauch-Dudek K, Kiran T, Shah BR, et al. Regional measures of diabetes burden in Ontario. Toronto: Institute for Clinical Evaluative Sciences; 2012.                                                                                                      |

| No. | First Author   | Year | Full Citation or Source                                                                                                                                                                                                                                                                         |
|-----|----------------|------|-------------------------------------------------------------------------------------------------------------------------------------------------------------------------------------------------------------------------------------------------------------------------------------------------|
| 37. | Booth          | 2017 | Booth CM, Nanji S, Wei X, Peng Y, Biagi JJ, Hanna TP, et al. Adjuvant chemotherapy for stage II colon cancer: practice patterns and effectiveness in the general population. <i>Clinical Oncology</i> . 2017 Jan 1;29(1):e29-38.                                                                |
| 38. | Borgès DaSilva | 2012 | Borgès DaSilva R. Impact of physician distribution policies on primary care practices in rural Quebec. <i>Can J Rural Med</i> . 2012;17(3).                                                                                                                                                     |
| 39. | Bos            | 2014 | Bos D, Abara E, Parmar MS. Knowledge, attitudes, and practice patterns among healthcare providers in the prevention of recurrent kidney stones in Northern Ontario. <i>Canadian Urological Association Journal</i> . 2014 Nov;8(11-12):E795.                                                    |
| 40. | Boscart        | 2018 | Boscart VM, Sidani S, Poss J, Davey M, d'Avernas J, Brown P, et al. The associations between staffing hours and quality of care indicators in long-term care. <i>BMC Health Services Research</i> . 2018 Dec 1;18(1):750.                                                                       |
| 41. | Boutis         | 2010 | Boutis K, Constantine E, Schuh S, Pecaric M, Stephens D, Narayanan UG. Pediatric emergency physician opinions on ankle radiograph clinical decision rules. <i>Academic Emergency Medicine</i> . 2010 Jul;17(7):709-17.                                                                          |
| 42. | Boutis         | 2013 | Boutis K, Grootendorst P, Willan A, Plint AC, Babyn P, Brison RJ, et al. Effect of the Low Risk Ankle Rule on the frequency of radiography in children with ankle injuries. <i>CMAJ</i> . 2013 Oct 15;185(15):E731-8.                                                                           |
| 43. | Boyle          | 2015 | Boyle TA, Bishop AC, Overmars C, MacMaster K, Mahaffey T, Zwicker B, et al. Uptake of quality-related event standards of practice by community pharmacies. <i>Journal of Pharmacy Practice</i> . 2015 Oct;28(5):442-9.                                                                          |
| 44. | Brennan        | 2018 | Brennan KE, Hall SF, Owen TE, Griffiths RJ, Peng Y. Variation in routine follow-up care after curative treatment for head-and-neck cancer: a population-based study in Ontario. <i>Current Oncology</i> . 2018 Apr;25(2):e120.                                                                  |
| 45. | Brien          | 2015 | Brien S, Grenier L, Kapral M.E., Kurdyak P, Vigod S. Taking stock: a report on the quality of mental health and addictions services in Ontario. An HQO/ICES report. Toronto, Health Quality Ontario and Institute for Clinical Evaluative Sciences; 2015.                                       |
| 46. | Bronskill      | 2011 | Bronskill SE, Corbett L, Gruneir A, Stevenson, JE. Introduction. In: Bronskill SE, Camacho X, Gruneir A, Ho MM, editors. <i>Health system use by frail Ontario seniors: an in-depth examination of four vulnerable cohorts</i> . Toronto, ON: Institute for Clinical Evaluative Sciences; 2011. |
| 47. | Brown          | 2018 | Brown CR, Hsu AT, Kendall C, Marshall D, Pereira J, Prentice M, et al. How are physicians delivering palliative care? a population-based retrospective cohort study                                                                                                                             |

| No. | First Author    | Year | Full Citation or Source                                                                                                                                                                                                                                                                                                                                                                                                                                                |
|-----|-----------------|------|------------------------------------------------------------------------------------------------------------------------------------------------------------------------------------------------------------------------------------------------------------------------------------------------------------------------------------------------------------------------------------------------------------------------------------------------------------------------|
|     |                 |      | describing the mix of generalist and specialist palliative care models in the last year of life. <i>Palliative Medicine</i> . 2018 Sep;32(8):1334-43.                                                                                                                                                                                                                                                                                                                  |
| 48. | Bryant-Lukosius | 2015 | Bryant-Lukosius D, Cosby R, Bakker D, Earle C, Fitzgerald B, Burkoski V, et al. Effective use of advanced practice nurses in the delivery of adult cancer services in Ontario. 2015. Available from: <a href="https://www.cancercareontario.ca/en/content/effective-use-advanced-practice-nurses-delivery-adult-cancer-services-ontario">https://www.cancercareontario.ca/en/content/effective-use-advanced-practice-nurses-delivery-adult-cancer-services-ontario</a> |
| 49. | Buick           | 2018 | Buick JE, Drennan IR, Scales DC, Brooks SC, Byers A, Cheskes S, et al. Improving temporal trends in survival and neurological outcomes after out-of-hospital cardiac arrest. <i>Circulation: Cardiovascular Quality and Outcomes</i> . 2018 Jan;11(1):e003561.                                                                                                                                                                                                         |
| 50. | Burden          | 2012 | Burden AM, Paterson JM, Solomon DH, Mamdani M, Juurlink DN, Cadarette SM. Bisphosphonate prescribing, persistence and cumulative exposure in Ontario, Canada. <i>Osteoporosis International</i> . 2012 Mar 1;23(3):1075-82.                                                                                                                                                                                                                                            |
| 51. | Burstein        | 2019 | Burstein B, Gravel J, Aronson PL, Neuman MI, Pediatric Emergency Research Canada (PERC). Emergency department and inpatient clinical decision tools for the management of febrile young infants among tertiary paediatric centres across Canada. <i>Paediatrics &amp; Child Health</i> . 2019 May 15;24(3):e142-54.                                                                                                                                                    |
| 52. | Busse           | 2013 | Busse J, Alexander PE, Abdul-Razzak A, Riva JJ, Alabousi M, Dufton J, et al. Appropriateness of spinal imaging use in Canada. 2013. Available from: <a href="http://nationalpaincentre.mcmaster.ca/documents/AppropriatenessofSpinalImagingFinalReportApril252013.pdf">http://nationalpaincentre.mcmaster.ca/documents/AppropriatenessofSpinalImagingFinalReportApril252013.pdf</a>                                                                                    |
| 53. | Butler          | 2009 | Butler M, Forte M, Kane RL, Joglekar S, Duval SJ, Swiontkowski M., et al. Treatment of common hip fractures. evidence report/technology assessment no. 184 (Prepared by the Minnesota Evidence-based Practice Center) Rockville, MD. Agency for Healthcare Research and Quality. August 2009.                                                                                                                                                                          |
| 54. | CADTH           | 2013 | CADTH. Appropriateness of CT imaging to support the diagnosis of stroke: a review of the clinical evidence. Ottawa: Canadian Agency for Drugs and Technologies in Health. 2013. Available from: <a href="https://cadth.ca/appropriateness-ct-imaging-support-diagnosis-stroke-review-clinical-evidence">https://cadth.ca/appropriateness-ct-imaging-support-diagnosis-stroke-review-clinical-evidence</a>                                                              |
| 55. | CADTH           | 2015 | Telemedicine for the treatment of urgent conditions: A review of clinical effectiveness, cost-effectiveness, and guidelines. Ottawa: Canadian Agency for Drugs and Technologies in Health. 2015. Available from: <a href="https://www.ncbi.nlm.nih.gov/books/NBK326842/pdf/Bookshelf_NBK326842.pdf">https://www.ncbi.nlm.nih.gov/books/NBK326842/pdf/Bookshelf_NBK326842.pdf</a>                                                                                       |

| No. | First Author                                  | Year | Full Citation or Source                                                                                                                                                                                                                                                                                                                                              |
|-----|-----------------------------------------------|------|----------------------------------------------------------------------------------------------------------------------------------------------------------------------------------------------------------------------------------------------------------------------------------------------------------------------------------------------------------------------|
| 56. | Cahill                                        | 2010 | Cahill NE, Narasimhan S, Dhaliwal R, Heyland DK. Attitudes and beliefs related to the Canadian critical care nutrition practice guidelines: an international survey of critical care physicians and dietitians. <i>Journal of Parenteral and Enteral Nutrition</i> . 2010 Nov;34(6):685-96.                                                                          |
| 57. | Cai                                           | 2019 | Cai H, Li H, Zeng H, Xu D, Ouyang W, Lv A. Application evaluation of clinical practice guidelines for traditional Chinese medicine: a clinical analysis based on the analytic hierarchy process. <i>BMC Complement Altern Med</i> . 2019 Oct 22;19(1):277.                                                                                                           |
| 58. | Campbell                                      | 2012 | Campbell RJ, Bell CM, Gill SS, Trope GE, Buys YM, Whitehead M, et al. Subspecialization in glaucoma surgery. <i>Ophthalmology</i> . 2012 Nov 1;119(11):2270-3.                                                                                                                                                                                                       |
| 59. | Campbell                                      | 2014 | Campbell RJ, Bell CM, Gill SS, Whitehead M, de LP Campbell E, Xu K, et al. Clinic-based glaucoma care in the era of surgical subspecialization. <i>American journal of ophthalmology</i> . 2014 Mar 1;157(3):631-9.                                                                                                                                                  |
| 60. | Campbell                                      | 2015 | Campbell RJ, Gill SS, ten Hove M, El-Defrawy SR, Strube YN, Whitehead M, et al. Strabismus surgical subspecialization: a population-based analysis. <i>JAMA ophthalmology</i> . 2015 May 1;133(5):555-9.                                                                                                                                                             |
| 61. | Campbell                                      | 2020 | Campbell M, Vu K, Pardhan A, Gallo-Hershberg D, Ku R, Redwood E, et al. Toward a common goal: improving safety of oral chemotherapy prescribing practices at a jurisdictional level. <i>JCO Oncol Pract</i> . 2020 Sep;16(9):e1036-e1044.                                                                                                                            |
| 62. | Canadian Institute for Health Information     | 2013 | Canadian Institute for Health Information. Adverse drug reaction-related hospitalizations among seniors, 2006 to 2011. Ottawa Canadian Institute for Health Information. 2013. Available from: <a href="https://secure.cihi.ca/free_products/Hospitalizations%20for%20ADR-ENweb.pdf">https://secure.cihi.ca/free_products/Hospitalizations%20for%20ADR-ENweb.pdf</a> |
| 63. | Canadian Institute for Health Information (a) | 2014 | Canadian Institute for Health Information. The delivery of radical prostatectomy to treat men with prostate cancer. Ottawa, ON: CIHI; 2014.                                                                                                                                                                                                                          |
| 64. | Canadian Institute for Health Information (b) | 2014 | Canadian Institute for Health Information. Sources of potentially avoidable emergency department visits, 2013–2014. Ottawa, ON: CIHI; 2014.                                                                                                                                                                                                                          |
| 65. | Cancer Care Ontario                           | 2015 | Cancer Care Ontario. Ontario cancer plan 2011-2015. 2015. Available from: <a href="http://ocp.cancercare.on.ca/common/pages/UserFile.aspx?fileId=84206">http://ocp.cancercare.on.ca/common/pages/UserFile.aspx?fileId=84206</a>                                                                                                                                      |



| No. | First Author        | Year | Full Citation or Source                                                                                                                                                                                                                                                                                                                                                                                                                                                                                                                                                    |
|-----|---------------------|------|----------------------------------------------------------------------------------------------------------------------------------------------------------------------------------------------------------------------------------------------------------------------------------------------------------------------------------------------------------------------------------------------------------------------------------------------------------------------------------------------------------------------------------------------------------------------------|
| 66. | Cancer Care Ontario | 2017 | Cancer Care Ontario. Recommendations for the delivery of psychosocial oncology services in Ontario. 2017. Available from: <a href="http://www.mhwcancer.ca/Providers/whatsnew/Documents/CCO-PsychosocialOncologyReport.pdf">http://www.mhwcancer.ca/Providers/whatsnew/Documents/CCO-PsychosocialOncologyReport.pdf</a>                                                                                                                                                                                                                                                    |
| 67. | Carlesso            | 2014 | Carlesso LC, MacDermid JC, Gross AR, Walton DM, Santaguida PL. Treatment preferences amongst physical therapists and chiropractors for the management of neck pain: results of an international survey. <i>Chiropractic &amp; Manual Therapies</i> . 2014 Dec;22(1):11.                                                                                                                                                                                                                                                                                                    |
| 68. | Carlos              | 2018 | Carlos EC, Youssef RF, Kaplan AG, Wollin DA, Winship BB, Eisner BH, et al. Antibiotic utilization before endourological surgery for urolithiasis: endourological society survey results. <i>Journal of Endourology</i> . 2018 Oct 1;32(10):978-85.                                                                                                                                                                                                                                                                                                                         |
| 69. | Casabon             | 2008 | Casabon LK, Saltman A, Peeva V, Ennis M, Lam N, Silver FL, et al. Variability in physician care practices for glucose treatment in stroke patients. <i>Canadian Journal of Neurological Sciences</i> . 2008 Nov;35(5):573-82.                                                                                                                                                                                                                                                                                                                                              |
| 70. | Cazale              | 2014 | Cazale L, Fournier C, Godbout M, Dubé-Linteau A, Dubé G, Murphy M, et al. Institut de la statistique du Québec Quebec survey on activity limitations, chronic diseases and aging 2010-2011: the use of health and social services for people with long-term health problems. 2014. Available from: <a href="http://www.stat.gouv.qc.ca/statistiques/sante/services/incapacites/limitations-maladies-chroniques-probleme-sante-longue.pdf">http://www.stat.gouv.qc.ca/statistiques/sante/services/incapacites/limitations-maladies-chroniques-probleme-sante-longue.pdf</a> |
| 71. | Chaillet            | 2015 | Chaillet N, Dumont A, Abrahamowicz M, Pasquier JC, Audibert F, Monnier P, et al. A cluster-randomized trial to reduce cesarean delivery rates in Quebec. <i>New England Journal of Medicine</i> . 2015 Apr 30;372(18):1710-21.                                                                                                                                                                                                                                                                                                                                             |
| 72. | Chapman             | 2017 | Chapman KR, Hinds D, Piazza P, Raheison C, Gibbs M, Greulich T, et al. Physician perspectives on the burden and management of asthma in six countries: The Global Asthma Physician Survey (GAPS). <i>BMC Pulmonary Medicine</i> . 2017 Dec;17(1):153.                                                                                                                                                                                                                                                                                                                      |
| 73. | Chaudhry            | 2018 | Chaudhry AT, Koulis TA, Speers C, Olson RA. Prescribing practices of endocrine therapy for ductal carcinoma in situ in British Columbia. <i>Current Oncology</i> . 2018 Apr;25(2):133.                                                                                                                                                                                                                                                                                                                                                                                     |
| 74. | Chen                | 2008 | Chen J, Normand SL. Myocardial infarction and quality of care. <i>Canadian Medical Association Journal</i> 2008;179(9):875-6.                                                                                                                                                                                                                                                                                                                                                                                                                                              |
| 75. | Chen                | 2012 | Chen I, Bajzak KI, Guo Y, Singh SS. A national survey of endoscopic practice among gynaecologists in Canada. <i>Journal of Obstetrics and Gynaecology Canada</i> . 2012 Mar 1;34(3):257-63.                                                                                                                                                                                                                                                                                                                                                                                |
| 76. | Chepeha             | 2020 | Chepeha JC, Silveira A, Sheps D, Beaupre LA; Shoulder and Upper Extremity Research Group of Edmonton (SURGE). Evaluating the uptake and acceptability of standardized                                                                                                                                                                                                                                                                                                                                                                                                      |

| No. | First Author | Year | Full Citation or Source                                                                                                                                                                                                                                                                                                 |
|-----|--------------|------|-------------------------------------------------------------------------------------------------------------------------------------------------------------------------------------------------------------------------------------------------------------------------------------------------------------------------|
|     |              |      | postoperative rehabilitation guidelines using an online knowledge translation approach. <i>Phys Ther.</i> 2020 Feb 7;100(2):225-237.                                                                                                                                                                                    |
| 77. | Cheskes      | 2015 | Cheskes S, Hillier M, Byers A, Verbeek PR, Drennan IR, Zhan C, Morrison LJ. The association between manual mode defibrillation, pre-shock pause duration and appropriate shock delivery when employed by basic life support paramedics during out-of-hospital cardiac arrest. <i>Resuscitation.</i> 2015 May 1;90:61-6. |
| 78. | Chesney      | 2018 | Chesney TR, Pang G, Ahmed N. Caring for older surgical patients: contemporary attitudes, knowledge, practices, and needs of general surgeons and residents. <i>Annals of Surgery.</i> 2018 Jul 1;268(1):77-85.                                                                                                          |
| 79. | Cheung       | 2007 | Cheung MC, Imrie KR, Leitch HA, Park-Wyllie LY, Buckstein R, Antoniou T, Loutfy MR. Physician perceptions and preferences in the treatment of acquired immunodeficiency syndrome (AIDS)-related lymphoma. <i>Annals of Hematology.</i> 2007 Sep 1;86(9):631-8.                                                          |
| 80. | Chin-Lenn    | 2013 | Chin-Lenn L, Craighead P, Bryant HE, Mack L, Temple W, Ghali W, Quan ML. Quality indicators for ductal carcinoma in situ (DCIS) of the breast: development using a multidisciplinary delphi process and its use in monitoring population-based treatment. <i>Journal of Surgical Oncology.</i> 2013 Nov;108(6):348-51.  |
| 81. | Chiu         | 2015 | Chiu H, Steele D, McAlister C, Lam WC. Delivery recommendations for pregnant females with risk factors for rhegmatogenous retinal detachment. <i>Canadian Journal of Ophthalmology.</i> 2015 Feb 1;50(1):11-8.                                                                                                          |
| 82. | Choi         | 2010 | Choi J, Chan S, Wiebe E. Natural family planning: physicians' knowledge, attitudes, and practice. <i>Journal of Obstetrics and Gynaecology Canada.</i> 2010 Jul 1;32(7):673-8.                                                                                                                                          |
| 83. | Christakis   | 2017 | Christakis MK, Shore EM, Pulver A, McDermott CD. Female pelvic medicine and reconstructive surgery in Canada: a survey of obstetrician-gynecologists and urologists. <i>Female Pelvic Medicine &amp; Reconstructive Surgery.</i> 2017 May 1;23(3):195-203.                                                              |
| 84. | Church       | 2018 | Church PC, Hyams J, Ruemmele F, de Ridder L, Turner D, Griffiths AM. The continental divide: anti-TNF use in pediatric IBD is different in North America compared to other parts of the world. <i>Canadian Journal of Gastroenterology and Hepatology.</i> 2018 Jun 12;2018:3190548.                                    |
| 85. | Clarke       | 2010 | Clarke A, Blundell N, Forde I, Musila N, Spitzer D, Naqvi S, et al. Can guidelines improve referral to elective surgical specialties for adults? a systematic review. <i>BMJ Quality &amp; Safety.</i> 2010 Jun 1;19(3):187-94.                                                                                         |

| No. | First Author                           | Year | Full Citation or Source                                                                                                                                                                                                                                                                                                   |
|-----|----------------------------------------|------|---------------------------------------------------------------------------------------------------------------------------------------------------------------------------------------------------------------------------------------------------------------------------------------------------------------------------|
| 86. | College of Family Physicians of Canada | 2009 | College of Family Physicians of Canada. Family physicians offering dermatologic services. <i>Canadian Family Physician</i> . 2009 Jul 1;55(7):718.                                                                                                                                                                        |
| 87. | Coroneos                               | 2017 | Coroneos CJ, Roth-Albin K, Rai AS, Rai AS, Voineskos SH, Brouwers MC, et al. Barriers, beliefs and practice patterns for breast cancer reconstruction: a provincial survey. <i>The Breast</i> . 2017 Apr 1;32:60-5.                                                                                                       |
| 88. | Cossette                               | 2020 | Cossette B, Bruneau MA, Couturier Y, Gilbert S, Boyer D, Ricard J, et al. Optimizing Practices, Use, Care and Services—Antipsychotics (OPUS-AP) in long-term care centers in Québec, Canada: a strategy for best practices. <i>Journal of the American Medical Directors Association</i> . 2020 Feb 1;21(2):212-9.        |
| 89. | Cree                                   | 2007 | Cree M, Lier D. Routine preoperative tests: are they necessary? <i>Institute of Health Economics</i> ; 2007.                                                                                                                                                                                                              |
| 90. | Cuddy (a)                              | 2015 | Cuddy KK, Mascarenhas W, Cobb G. Participation of Canadian oral and maxillofacial surgeons in oral, lip, and oropharyngeal cancer care. <i>Journal of Oral and Maxillofacial Surgery</i> . 2015 Dec 1;73(12):2440-5.                                                                                                      |
| 91. | Cuddy (b)                              | 2015 | Cuddy KK, Cobb G. The participation of ontario oral and maxillofacial surgeons in oral, lip and oropharyngeal cancer. <i>J Can Dent Assoc</i> . 2015;81:f6.                                                                                                                                                               |
| 92. | Cummings                               | 2020 | Cummings GG, McLane P, Reid RC, Tate K, Cooper SL, Rowe BH, et al. Fractured care: a window into emergency transitions in care for LTC residents with complex health needs. <i>J Aging Health</i> . 2020 Mar;32(3-4):119-133.                                                                                             |
| 93. | Damani                                 | 2019 | Damani Z, Bohm E, Quan H, Noseworthy T, MacKean G, Loucks L, et al. Improving the quality of care with a single-entry model of referral for total joint replacement: a preimplementation/postimplementation evaluation. <i>BMJ Open</i> . 2019 Dec 1;9(12).                                                               |
| 94. | D'Amour                                | 2014 | D'Amour D, Dubois CA, Tchouaket É, Clarke S, Blais R. The occurrence of adverse events potentially attributable to nursing care in medical units: cross sectional record review. <i>International Journal of Nursing Studies</i> . 2014 Jun 1;51(6):882-91.                                                               |
| 95. | Dahl                                   | 2019 | Dahl L, Schultz A, McGibbon E, Brownlie J, Cook C, Elbarouni B, et al. Cardiovascular medication use and long-term outcomes of First Nations and non-First Nations patients following diagnostic angiography: a retrospective cohort study. <i>Journal of the American Heart Association</i> . 2019 Aug 20;8(16):e012040. |

| No.  | First Author | Year | Full Citation or Source                                                                                                                                                                                                                                                                                     |
|------|--------------|------|-------------------------------------------------------------------------------------------------------------------------------------------------------------------------------------------------------------------------------------------------------------------------------------------------------------|
| 96.  | Daneman      | 2015 | Daneman N, Bronskill SE, Gruneir A, Newman AM, Fischer HD, Rochon PA, et al. Variability in antibiotic use across nursing homes and the risk of antibiotic-related adverse outcomes for individual residents. <i>JAMA Internal Medicine</i> . 2015 Aug 1;175(8):1331-9.                                     |
| 97.  | Daoust       | 2018 | Daoust R, Paquet J, Moore L, Gosselin S, G elinas C, Rouleau DM, et al. Incidence and risk factors of long-term opioid use in elderly trauma patients. <i>Annals of Surgery</i> . 2018 Dec 1;268(6):985-91.                                                                                                 |
| 98.  | Darling      | 2014 | Darling EK, Guttman A, Sprague AE, Ramsay T, Walker MC. Implementation of the Canadian Paediatric Society's hyperbilirubinemia guidelines: a survey of Ontario hospitals. <i>Paediatrics &amp; Child Health</i> . 2014 Mar 1;19(3):133-7.                                                                   |
| 99.  | Davies       | 2018 | Davies SJ, Jacob B, Rudoler D, Zaheer J, de Oliveira C, Kurdyak P. Benzodiazepine prescription in Ontario residents aged 65 and over: a population-based study from 1998 to 2013. <i>Therapeutic Advances in Psychopharmacology</i> . 2018 Mar;8(3):99-114.                                                 |
| 100. | Decker       | 2015 | Decker KM, McLachlin CM, Lotocki R, Network PC, Monitoring Program Performance Working Group. Performance measures related to colposcopy for Canadian cervical cancer screening programs: identifying areas for improvement. <i>Journal of Obstetrics and Gynaecology Canada</i> . 2015 Mar 1;37(3):245-51. |
| 101. | Dedhiya      | 2010 | Dedhiya SD, Hancock E, Craig BA, Doebbeling CC, Thomas III J. Incident use and outcomes associated with potentially inappropriate medication use in older adults. <i>The American Journal of Geriatric Pharmacotherapy</i> . 2010 Dec 1;8(6):562-70.                                                        |
| 102. | Deif         | 2018 | Deif B, Kang S, Ismail A, Vanniyasingam T, Guzman JC, Morillo CA. Application of syncope guidelines in the emergency department do not reduce admission rates: a retrospective cohort study. <i>Can J Cardiol</i> 2018;34(9):1158-1164. 2018                                                                |
| 103. | deOliveira   | 2019 | de Oliveira C, Cheng J, Kurdyak P. Determining preventable acute care spending among high-cost patients in a single-payer public health care system. <i>The European Journal of Health Economics</i> . 2019 Aug 1;20(6):869-78.                                                                             |
| 104. | Derghazarian | 2011 | Derghazarian T, Simmonds MJ. Management of low back pain by physical therapists in Quebec: how are we doing?. <i>Physiotherapy Canada</i> . 2011 Oct;63(4):464-73.                                                                                                                                          |
| 105. | Desveaux     | 2017 | Desveaux L, Saragosa M, Rogers J, Bevan L, Loshak H, Moser A, et al. Improving the appropriateness of antipsychotic prescribing in nursing homes: a mixed-methods process evaluation of an academic detailing intervention. <i>Implementation Science</i> . 2017 Dec;12(1):71.                              |

| No.  | First Author   | Year | Full Citation or Source                                                                                                                                                                                                                                                             |
|------|----------------|------|-------------------------------------------------------------------------------------------------------------------------------------------------------------------------------------------------------------------------------------------------------------------------------------|
| 106. | Devenyi        | 2016 | Devenyi R, Maberley D, Sheidow TG, Tourville E, Brunck L, Berger AR. Real-world utilization of ranibizumab in wet age-related macular degeneration patients from Canada. <i>Canadian Journal of Ophthalmology</i> . 2016 Apr 1;51(2):55-7.                                          |
| 107. | Dhanani        | 2012 | Dhanani S, Ward R, Hornby L, Barrowman NJ, Hornby K, Shemie SD, et al. Survey of determination of death after cardiac arrest by intensive care physicians. <i>Critical Care Medicine</i> . 2012 May 1;40(5):1449-55.                                                                |
| 108. | Dipaola        | 2009 | Dipaola CP, Bible JE, Biswas D, Dipaola M, Grauer JN, Rechtine GR. Survey of spine surgeons on attitudes regarding osteoporosis and osteomalacia screening and treatment for fractures, fusion surgery, and pseudoarthrosis. <i>The Spine Journal</i> . 2009 Jul 1;9(7):537-44.     |
| 109. | Dorfman        | 2020 | Dorfman R, London Z, Metias M, Kabakchiev B, Mukerjee G, Moser A. Individualized medication management in Ontario long-term care clinical impact on management of depression, pain, and dementia. <i>J Am Med Dir Assoc</i> . 2020 Jun;21(6):823-829.e5.                            |
| 110. | Doucette       | 2009 | Doucette K, Robson V, Shafran S, Kunimoto D. Improving access to care by allowing self-referral to a hepatitis C clinic. <i>Canadian Journal of Gastroenterology and Hepatology</i> . 2009;23(6):421-4.                                                                             |
| 111. | Doumouras      | 2016 | Doumouras AG, Saleh F, Eskicioglu C, Amin N, Cadeddu M, Hong D. Neighborhood variation in the utilization of laparoscopy for the treatment of colon cancer. <i>Diseases of the Colon &amp; Rectum</i> . 2016 Aug 1;59(8):781-8.                                                     |
| 112. | Ducharme       | 2016 | Ducharme FM, Lamontagne AJ, Blais L, Grad R, Lavoie KL, Bacon SL, et al. Enablers of physician prescription of a long-term asthma controller in patients with persistent asthma. <i>Canadian Respiratory Journal</i> . 2016;2016.                                                   |
| 113. | Duran-Barragan | 2008 | Duran-Barragan S, Russell AS. Use of nonsteroidal anti-inflammatory drugs and coxibs in the elderly. are we following the guidelines? <i>Clin Rheumatol</i> . 2008. 27: 1081. <a href="https://doi.org/10.1007/s10067-008-0959-0">https://doi.org/10.1007/s10067-008-0959-0</a>     |
| 114. | Eguale         | 2012 | Eguale T, Buckeridge DL, Winslade NE, Benedetti A, Hanley JA, Tamblyn R. Drug, patient, and physician characteristics associated with off-label prescribing in primary care. <i>Archives of Internal Medicine</i> . 2012 May 28;172(10):781-8.                                      |
| 115. | Estrada        | 2018 | Estrada A, Tsao NW, Howren A, Esdaile JM, Shojania K, De Vera MA. Utility of electronic medical records in community rheumatology practice for assessing quality of care indicators for gout: a feasibility study. <i>Journal of Clinical Rheumatology</i> . 2018 Mar 1;24(2):75-9. |

| No.  | First Author | Year | Full Citation or Source                                                                                                                                                                                                                                                              |
|------|--------------|------|--------------------------------------------------------------------------------------------------------------------------------------------------------------------------------------------------------------------------------------------------------------------------------------|
| 116. | Eubank       | 2018 | Eubank BH, Lafave MR, Wiley JP, Sheps DM, Bois AJ, Mohtadi NG. Evaluating quality of care for patients with rotator cuff disorders. <i>BMC Health Services Research</i> . 2018 Dec;18(1):569.                                                                                        |
| 117. | Fairchild    | 2012 | Fairchild A, Ghosh S, Baker J. Patterns of referral and knowledge of palliative radiotherapy in Alberta. <i>Canadian Family Physician</i> . 2012 Feb 1;58(2):e113-22.                                                                                                                |
| 118. | Farrell      | 2018 | Farrell B, Richardson L, Raman-Wilms L, de Launay D, Alsabbagh MW, Conklin J. Self-efficacy for deprescribing: a survey for health care professionals using evidence-based deprescribing guidelines. <i>Research in Social and Administrative Pharmacy</i> . 2018 Jan 1;14(1):18-25. |
| 119. | Ferrari      | 2016 | Ferrari R. Imaging studies in patients with spinal pain: practice audit evaluation of Choosing Wisely Canada recommendations. <i>Canadian Family Physician</i> . 2016 Mar 1;62(3):e129-37.                                                                                           |
| 120. | Ferrouillet  | 2015 | Ferrouillet C, Milord F, Lambert L, Vibien A, Ravel A. Lyme disease: knowledge and practices of family practitioners in southern Quebec. <i>Canadian Journal of Infectious Diseases and Medical Microbiology</i> . 2015;26(3):151-6.                                                 |
| 121. | Fisher       | 2016 | Fisher S, Yasui Y, Dabbs K, Winget M. Using multilevel models to explain variation in clinical practice: surgeon volume and the surgical treatment of breast cancer. <i>Annals of Surgical Oncology</i> . 2016 Jun 1;23(6):1845-51.                                                  |
| 122. | Fleury       | 2018 | Fleury MJ, Grenier G, Bamvita JM, Vallée C, Farand L, Chiocchio F. Évaluation du Plan d'action en santé mentale (2005-2015): intégration et performance des réseaux de services. <i>Sante Ment Que</i> . 2018 Spring;43(1):15-38.                                                    |
| 123. | Fleury       | 2019 | Fleury MJ, Fortin M, Rochette L, Grenier G, Huynh C, Pelletier É, et al Assessing quality indicators related to mental health emergency room utilization. <i>BMC Emergency Medicine</i> . 2019 Dec 1;19(1):8.                                                                        |
| 124. | Foebel       | 2015 | Foebel A, Balloková A, Wellens NI, Fialova D, Milisen K, Liperoti R, et al. A retrospective, longitudinal study of factors associated with new antipsychotic medication use among recently admitted long-term care residents. <i>BMC Geriatrics</i> . 2015 Dec;15(1):128.            |
| 125. | Forbes       | 2016 | Forbes N, Cooray M, Al-Dabbagh R, Yuan Y, Tse F, Liu LW, et al. Domperidone prescribing practices exposed patients to cardiac risk despite a “black box” warning: a Canadian tertiary care center study. <i>Canadian Journal of Gastroenterology and Hepatology</i> . 2016;2016.     |

| No.  | First Author  | Year | Full Citation or Source                                                                                                                                                                                                                                                                                                     |
|------|---------------|------|-----------------------------------------------------------------------------------------------------------------------------------------------------------------------------------------------------------------------------------------------------------------------------------------------------------------------------|
| 126. | Fortin        | 2014 | Fortin MM, Brown C, Ball GD, Chanoine JP, Langlois MF. Weight management in Canada: an environmental scan of health services for adults with obesity. <i>BMC Health Services Research</i> . 2014 Dec;14(1):69.                                                                                                              |
| 127. | Fortin        | 2020 | Fortin É, Jean S, Sirois C, Simard M, Irace-Cima A, Émond V, et al. Chronic respiratory disease should be considered when interpreting indicators of community antimicrobial use in people over 65 years old. <i>Canadian Journal of Public Health</i> . 2020 Jan 14:1-5.                                                   |
| 128. | Fortinsky     | 2016 | Fortinsky KJ, Martel M, Razik R, Spiegle G, Gallinger ZR, Grover SC, et al. Red blood cell transfusions and iron therapy for patients presenting with acute upper gastrointestinal bleeding: a survey of Canadian gastroenterologists and hepatologists. <i>Canadian Journal of Gastroenterology and Hepatology</i> . 2016. |
| 129. | Fung          | 2015 | Fung D, Schabert I, MacLean CA, Asrar FM, Khory A, Vandermeer B, et al. Test ordering for preventive health care among family medicine residents. <i>Canadian Family Physician</i> . 2015 Mar 1;61(3):256-62.                                                                                                               |
| 130. | Fung-Kee-Fung | 2014 | Fung-Kee-Fung M, Boushey RP, Watters J, Morash R, Smylie J, Morash C, et al. Piloting a regional collaborative in cancer surgery using a “community of practice” model. <i>Current Oncology</i> . 2014 Feb;21(1):27.                                                                                                        |
| 131. | Gandhi        | 2014 | Gandhi S, Zile B, Tan MK, Saranu J, Bucci C, Yan AT, et al. Increased uptake of guideline-recommended oral antiplatelet therapy: insights from the Canadian acute coronary syndrome reflective. <i>Canadian Journal of Cardiology</i> . 2014 Dec 1;30(12):1725-31.                                                          |
| 132. | Garland       | 2020 | Garland A, Marrie RA, Wunsch H, Yogendran M, Chateau D. Accuracy of administrative hospital data to identify use of life support modalities. a Canadian study. <i>Ann Am Thorac Soc</i> . 2020 Feb;17(2):229-235.                                                                                                           |
| 133. | Ghate         | 2018 | Ghate K, Brennan K, Karim S, Siemens DR, Mackillop WJ, Booth CM. Concurrent chemoradiotherapy for bladder cancer: practice patterns and outcomes in the general population. <i>Radiotherapy and Oncology</i> . 2018 Apr 1;127(1):136-42.                                                                                    |
| 134. | Giberson      | 2015 | Giberson M, Taylor V. Experience of New Brunswick ophthalmologists using intravitreal anti-vascular endothelial growth factor. <i>Canadian Journal of Ophthalmology</i> . 2015 Oct 1;50(5):393-4.                                                                                                                           |
| 135. | Giblon        | 2017 | Giblon R, Bauer GR. Health care availability, quality, and unmet need: a comparison of transgender and cisgender residents of Ontario, Canada. <i>BMC Health Services Research</i> . 2017 Dec;17(1):283.                                                                                                                    |

| No.  | First Author | Year | Full Citation or Source                                                                                                                                                                                                                                                             |
|------|--------------|------|-------------------------------------------------------------------------------------------------------------------------------------------------------------------------------------------------------------------------------------------------------------------------------------|
| 136. | Gibson       | 2019 | Gibson G, Grignon M, Hurley J, Wang L. Here comes the SUN: Self-assessed unmet need, worsening health outcomes, and health care inequity. <i>Health Econ.</i> 2019 Jun;28(6):727-735.                                                                                               |
| 137. | Gilfoyle     | 2017 | Gilfoyle E, Koot DA, Annear JC, Bhanji F, Cheng A, Duff JP, et al. Improved clinical performance and teamwork of pediatric interprofessional resuscitation teams with a simulation-based educational intervention. <i>Pediatric Critical Care Medicine.</i> 2017 Feb 1;18(2):e62-9. |
| 138. | Gill         | 2019 | Gill P, Guo M, Lau CK, Naugler C. Vitamin B12 test volume data before and after the implementation of an educational province-wide intervention to reduce redundant testing in Alberta. <i>Data Brief.</i> 2019 Nov 11;27:104785.                                                   |
| 139. | Glazier      | 2015 | Glazier R, Rayner J, Kopp A. Examining Community Health Centres According to Geography and Priority Populations Served, 2011/12 to 2012/13: An ICES Chartbook. Toronto: Institute for Clinical Evaluative Sciences; 2015.                                                           |
| 140. | Grover       | 2011 | Grover S, Coupal L, Kouache M, Lowensteyn I, Marchand S, Campbell N. Estimating the benefits of patient and physician adherence to cardiovascular prevention guidelines: the MyHealthCheckup Survey. <i>Canadian Journal of Cardiology.</i> 2011 Mar 1;27(2):159-66.                |
| 141. | Grunfeld     | 2013 | Grunfeld E, Manca D, Moineddin R, Thorpe KE, Hoch JS, Campbell-Scherer D, et al. Improving chronic disease prevention and screening in primary care: results of the BETTER pragmatic cluster randomized controlled trial. <i>BMC Family Practice.</i> 2013 Dec;14(1):175.           |
| 142. | Guinhouya    | 2019 | Guinhouya BC, Bisson M, Dubois L, Sériès F, Kimoff JR, Fraser WD, et al. Body weight status and sleep disturbances during pregnancy: does adherence to gestational weight gain guidelines matter? <i>J Womens Health (Larchmt).</i> 2019 Apr;28(4):535-543.                         |
| 143. | Haiek        | 2012 | Haiek LN. Compliance with baby-friendly policies and practices in hospitals and community health centers in Quebec. <i>Journal of Human Lactation.</i> 2012 Aug;28(3):343-58.                                                                                                       |
| 144. | Hailey       | 2008 | Hailey D. CT and MRI services in Alberta: comparisons with other health care systems. Institute of Health Economics; 2008.                                                                                                                                                          |
| 145. | Halili       | 2019 | Halili L, Liu RH, Weeks A, Deonandan R, Adamo KB. High maternal self-efficacy is associated with meeting Institute of Medicine gestational weight gain recommendations. <i>PLoS One.</i> 2019 Dec 11;14(12):e0226301.                                                               |



| No.  | First Author | Year | Full Citation or Source                                                                                                                                                                                                                                         |
|------|--------------|------|-----------------------------------------------------------------------------------------------------------------------------------------------------------------------------------------------------------------------------------------------------------------|
| 146. | Hall         | 2011 | Hall R, Khan F, O'Callaghan C, Meyer S, Fang J, Hodwitz K, et al. Ontario stroke evaluation report 2011: improving system efficiency by implementing stroke best practices. Toronto: Institute for Clinical Evaluative Sciences; 2011.                          |
| 147. | Hall (a)     | 2013 | Hall RE, Khan F, Bayley MT, Asllani E, Lindsay P, Hill MD, et al. Benchmarks for acute stroke care delivery. <i>International Journal for Quality in Health Care</i> . 2013 Oct 17;25(6):710-8.                                                                 |
| 148. | Hall (b)     | 2013 | Hall R, Khan F, O'Callaghan C, Kapral MK, Hodwitz K, Kapila S, et al. Ontario stroke evaluation report 2013: spotlight on secondary stroke prevention and care. Toronto: Institute for Clinical Evaluative Sciences; 2013.                                      |
| 149. | Hall (a)     | 2014 | Hall SF, Irish JC, Groome PA, Urbach DR. Practice patterns in the management of patients with differentiated thyroid cancer in Ontario Canada 2000-2008. <i>Journal of Otolaryngology-Head &amp; Neck Surgery</i> . 2014 Dec;43(1):29.                          |
| 150. | Hall (b)     | 2014 | Hall R, Khan F, O'Callaghan C, Kapral MK, Levi J, Cullen A, et al. Ontario stroke evaluation report 2014: on target for stroke prevention and care. Toronto, ON: Institute for Clinical Evaluative Sciences; 2014.                                              |
| 151. | Hall         | 2016 | Hall RE, French E, Khan F, Zhou L, Linkewich B, Willems D, et al. Ontario stroke evaluation report 2016: a focus on stroke rehabilitation. Toronto, ON: Institute for Clinical Evaluative Sciences; 2016.                                                       |
| 152. | Hall         | 2018 | Hall RE, Tee A, Khan F, McCormack D, Levi J, Verrilli S, et al. Ontario stroke evaluation report 2018: stroke care and outcomes in complex continuing care and long-term care. Toronto, ON: Institute for Clinical Evaluative Sciences/CorHealth Ontario; 2018. |
| 153. | Hall         | 2019 | Hall SF, Webber C, Groome PA, Booth CM, Nguyen P, DeWit Y. Do doctors who order more routine medical tests diagnose more cancers? A population-based study from Ontario Canada. <i>Cancer Medicine</i> . 2019 Feb;8(2):850-9.                                   |
| 154. | Halme        | 2013 | Halme AS, Beland SG, Preville M, Tannenbaum C. Uncovering the source of new benzodiazepine prescriptions in community-dwelling older adults. <i>International Journal of Geriatric Psychiatry</i> . 2013 Mar;28(3):248-55.                                      |
| 155. | Hamelin      | 2018 | Hamelin AL, Yan JW, Stiell IG. Emergency department management of diabetic ketoacidosis and hyperosmolar hyperglycemic state in adults: national survey of attitudes and practice. <i>Canadian Journal of Diabetes</i> . 2018 Jun 1;42(3):229-36.               |
| 156. | Harris       | 2013 | Harris SB, Gerstein HC, Yale JF, Berard L, Stewart J, Webster-Bogaert S, et al. Can community retail pharmacist and diabetes expert support facilitate insulin initiation by                                                                                    |

| No.  | First Author               | Year | Full Citation or Source                                                                                                                                                                                                                                                                                                                                                                                                                                                                                                                                                                                                                                                                                                                                                                                                                                                                                      |
|------|----------------------------|------|--------------------------------------------------------------------------------------------------------------------------------------------------------------------------------------------------------------------------------------------------------------------------------------------------------------------------------------------------------------------------------------------------------------------------------------------------------------------------------------------------------------------------------------------------------------------------------------------------------------------------------------------------------------------------------------------------------------------------------------------------------------------------------------------------------------------------------------------------------------------------------------------------------------|
|      |                            |      | family physicians? Results of the AIM@ GP randomized controlled trial. BMC Health Services Research. 2013 Dec;13(1):71.                                                                                                                                                                                                                                                                                                                                                                                                                                                                                                                                                                                                                                                                                                                                                                                      |
| 157. | Hartmann                   | 2009 | Hartmann KE, McPheeters ML, Biller DH, Ward RM, McKoy JN, Jerome RN, et al. Treatment of overactive bladder in women. evidence report/technology assessment No. 187. Rockville, MD: Agency for Healthcare Research and Quality. August 2009.                                                                                                                                                                                                                                                                                                                                                                                                                                                                                                                                                                                                                                                                 |
| 158. | Hawkins                    | 2019 | Hawkins NM, Daniele PR, Humphries KH, Ezekowitz JA, McAlister FA, Sandhu RK, et al. Empirical insights when defining the population burden of atrial fibrillation and oral anticoagulation utilization using administrative data. Can J Cardiol. 2019 Oct;35(10):1412-1415.                                                                                                                                                                                                                                                                                                                                                                                                                                                                                                                                                                                                                                  |
| 159. | Health Council of Canada   | 2007 | Health Council of Canada. Why health care renewal matters: lessons from diabetes. 2007. Available from: <a href="http://publications.gc.ca/collections/collection_2007/hcc-ccs/H174-5-2007E.pdf">http://publications.gc.ca/collections/collection_2007/hcc-ccs/H174-5-2007E.pdf</a>                                                                                                                                                                                                                                                                                                                                                                                                                                                                                                                                                                                                                          |
| 160. | Health Quality Ontario (a) | 2015 | Health Quality Ontario. Quality in primary care- setting a foundation for monitoring and reporting in Ontario. 2015. Available from: <a href="http://www.hqontario.ca/Portals/0/Documents/pr/theme-report-quality-in-primary-care-en.pdf">http://www.hqontario.ca/Portals/0/Documents/pr/theme-report-quality-in-primary-care-en.pdf</a>                                                                                                                                                                                                                                                                                                                                                                                                                                                                                                                                                                     |
| 161. | Health Quality Ontario (b) | 2015 | Health Quality Ontario. Looking for balance: antipsychotic medication use in Ontario long-term care homes. 2015. Available from: <a href="http://www.hqontario.ca/portals/0/Documents/pr/looking-for-balance-en.pdf">http://www.hqontario.ca/portals/0/Documents/pr/looking-for-balance-en.pdf</a>                                                                                                                                                                                                                                                                                                                                                                                                                                                                                                                                                                                                           |
| 162. | Health Quality Ontario (a) | 2016 | Health Quality Ontario. Major depression: care for adults and adolescents. 2016. Available from: <a href="http://www.hqontario.ca/portals/0/documents/evidence/quality-standards/qs-depression-getting-starteden.pdf?utm_medium=email&amp;utm_campaign=Health%20Quality%20Ontario%20e-Newsletter%20June%202017%20English&amp;utm_content=Health%20Quality%20Ontario%20eNewsletter%20June%202017%20English+CID_96878f2ac6eb9199a810239802124a6f&amp;utm_source=email%20CM&amp;utm_term=Major%20Depression">http://www.hqontario.ca/portals/0/documents/evidence/quality-standards/qs-depression-getting-starteden.pdf?utm_medium=email&amp;utm_campaign=Health%20Quality%20Ontario%20e-Newsletter%20June%202017%20English&amp;utm_content=Health%20Quality%20Ontario%20eNewsletter%20June%202017%20English+CID_96878f2ac6eb9199a810239802124a6f&amp;utm_source=email%20CM&amp;utm_term=Major%20Depression</a> |
| 163. | Health Quality Ontario (b) | 2016 | Health Quality Ontario. Schizophrenia: care for adults in hospitals. 2016. Available from: <a href="http://www.hqontario.ca/portals/0/documents/evidence/quality-standards/qs-schizophrenia-getting-started-en.pdf?utm_medium=email&amp;utm_campaign=Health%20Quality%20Ontario%20e-Newsletter%20June%202017%20English&amp;utm_content=Health%20Quality%20Ontario%20eNewsletter%20June%202017%20English+CID_96878f2ac6eb9199a810239802124a6f&amp;utm_source=email%20CM&amp;utm_term=Schizophrenia">http://www.hqontario.ca/portals/0/documents/evidence/quality-standards/qs-schizophrenia-getting-started-en.pdf?utm_medium=email&amp;utm_campaign=Health%20Quality%20Ontario%20e-Newsletter%20June%202017%20English&amp;utm_content=Health%20Quality%20Ontario%20eNewsletter%20June%202017%20English+CID_96878f2ac6eb9199a810239802124a6f&amp;utm_source=email%20CM&amp;utm_term=Schizophrenia</a>         |

| No.  | First Author           | Year | Full Citation or Source                                                                                                                                                                                                                                                                                                                                                         |
|------|------------------------|------|---------------------------------------------------------------------------------------------------------------------------------------------------------------------------------------------------------------------------------------------------------------------------------------------------------------------------------------------------------------------------------|
| 164. | Health Quality Ontario | 2017 | Health Quality Ontario. Quality surgery: improving surgical care in Ontario. Toronto: Queen's Printer for Ontario; 2017                                                                                                                                                                                                                                                         |
| 165. | Hennessy               | 2016 | Hennessy DA, Tanuseputro P, Tuna M, Bennett C, Perez R, Shields M, et al. Population health impact of statin treatment in Canada. <i>Health Reports</i> . 2016 Jan 1;27(1):20-9.                                                                                                                                                                                                |
| 166. | Henry                  | 2012 | Henry B, Crabtree A, Roth D, Blackman D, Morshed M. Lyme disease: knowledge, beliefs, and practices of physicians in a low-endemic area. <i>Canadian Family Physician</i> . 2012 May 1;58(5):e289-95.                                                                                                                                                                           |
| 167. | Herman                 | 2016 | Herman AR, Cheung C, Gerull B, Simpson CS, Birnie DH, Klein GJ, et al. Outcome of apparently unexplained cardiac arrest: results from investigation and follow-up of the prospective cardiac arrest survivors with preserved ejection fraction registry. <i>Circulation: Arrhythmia and Electrophysiology</i> . 2016 Jan;9(1):e003619.                                          |
| 168. | Herrmann               | 2013 | Herrmann N, Marras C, Fischer HD, Wang X, Anderson GM, Rochon PA. Management of neuropsychiatric symptoms in long-term care residents with parkinson's disease. <i>Drugs &amp; Aging</i> . 2013 Jan 1;30(1):19-22.                                                                                                                                                              |
| 169. | Hewitt                 | 2018 | Hewitt L, Benjamin-Neelon SE, Carson V, Stanley RM, Janssen I, Okely AD. Child care centre adherence to infant physical activity and screen time recommendations in Australia, Canada and the United States: an observational study. <i>Infant Behavior and Development</i> . 2018 Feb 1;50:88-97.                                                                              |
| 170. | Hill-Taylor            | 2016 | Hill-Taylor B, Sketris IS, Gardner DM, Thompson K. Concordance with a STOPP (screening tool of older Persons' potentially inappropriate prescriptions) criterion in Nova Scotia, Canada: benzodiazepine and Zopiclone prescription claims by older adults with fall-related hospitalizations. <i>Journal of Population Therapeutics and Clinical Pharmacology</i> . 2016;23(1). |
| 171. | Hirdes                 | 2020 | Hirdes JP, Major J, Didic S, Quinn C, Mitchell L, Chen J, et al. A Canadian cohort study to evaluate the outcomes associated with a multicenter initiative to reduce antipsychotic use in long-term care homes. <i>J Am Med Dir Assoc</i> . 2020 Jun;21(6):817-822.                                                                                                             |
| 172. | Hohl                   | 2017 | Hohl CM, Partovi N, Ghement I, Wickham ME, McGrail K, Reddekopp LN, et al. Impact of early in-hospital medication review by clinical pharmacists on health services utilization. <i>PloS One</i> . 2017 Feb 13;12(2):e0170495.                                                                                                                                                  |
| 173. | Hua                    | 2012 | Hua D, Carter S, Bellerive J, Allu SO, Reid D, Tremblay G, et al. Bridging the gap: innovative knowledge translation and the Canadian hypertension education program. <i>Canadian Journal of Cardiology</i> . 2012 May 1;28(3):258-61.                                                                                                                                          |

| No.  | First Author                       | Year | Full Citation or Source                                                                                                                                                                                                                                                                                                                                                                                                                                                                                                                                                                                                                                                                                                                                                                                                                                                                                                                                                                                                                                                                                                                          |
|------|------------------------------------|------|--------------------------------------------------------------------------------------------------------------------------------------------------------------------------------------------------------------------------------------------------------------------------------------------------------------------------------------------------------------------------------------------------------------------------------------------------------------------------------------------------------------------------------------------------------------------------------------------------------------------------------------------------------------------------------------------------------------------------------------------------------------------------------------------------------------------------------------------------------------------------------------------------------------------------------------------------------------------------------------------------------------------------------------------------------------------------------------------------------------------------------------------------|
| 174. | Huang                              | 2016 | Huang VW, Chang HJ, Kroeker KI, Goodman KJ, Hegadoren KM, Dieleman LA, et al. Management of inflammatory bowel disease during pregnancy and breastfeeding varies widely: a need for further education. <i>Canadian Journal of Gastroenterology and Hepatology</i> . 2016;2016.                                                                                                                                                                                                                                                                                                                                                                                                                                                                                                                                                                                                                                                                                                                                                                                                                                                                   |
| 175. | ICES–Métis Nation of Ontario (MNO) | 2012 | Shah BR, Cauch-Dudek K, Wu CF. ICES–Métis Nation of Ontario reports on chronic diseases: diabetes. March 2012. Available from: <a href="https://www.ices.on.ca/Publications/Atlases-and-Reports/2012/ICES-MNO-Reports-on-Chronic-Diseases">https://www.ices.on.ca/Publications/Atlases-and-Reports/2012/ICES-MNO-Reports-on-Chronic-Diseases</a><br><br>Klein-Geltink J, Saskin R, Manno M, Urbach DR, Henry DA. ICES–Métis Nation of Ontario reports on chronic diseases: cancer: March 2012. Available from: <a href="https://www.ices.on.ca/Publications/Atlases-and-Reports/2012/ICES-MNO-Reports-on-Chronic-Diseases">https://www.ices.on.ca/Publications/Atlases-and-Reports/2012/ICES-MNO-Reports-on-Chronic-Diseases</a><br><br>Klein-Geltink J, Khan S, Cascagnette P, Gershon G, To T, Crighton E, et al. ICES–Métis Nation of Ontario reports on chronic diseases: respiratory disease. March 2012. Available from: <a href="https://www.ices.on.ca/Publications/Atlases-and-Reports/2012/ICES-MNO-Reports-on-Chronic-Diseases">https://www.ices.on.ca/Publications/Atlases-and-Reports/2012/ICES-MNO-Reports-on-Chronic-Diseases</a> |
| 176. | Innes                              | 2018 | Innes G, McRae A, Grafstein E, Law M, Teichman JMH, Weber B, et al. Variability of renal colic management and outcomes in two Canadian cities. <i>CJEM</i> . 2018;20(5):702-712. 2018                                                                                                                                                                                                                                                                                                                                                                                                                                                                                                                                                                                                                                                                                                                                                                                                                                                                                                                                                            |
| 177. | Ip                                 | 2013 | Ip S, Sokoro AA, Buchel A, Wirtzfeld D, Konrad G, Fatoye T, et al. Use of fecal occult blood test in hospitalized patients: survey of physicians practicing in a large central Canadian health region and Canadian gastroenterologists. <i>Canadian Journal of Gastroenterology and Hepatology</i> . 2013;27(12):711-6.                                                                                                                                                                                                                                                                                                                                                                                                                                                                                                                                                                                                                                                                                                                                                                                                                          |
| 178. | Iqbal                              | 2020 | Iqbal J, Sutradhar R, Zhao H, Howell D, O'Brien MA, Seow H, et al. Operationalizing outpatient palliative care referral criteria in lung cancer patients: a population-based cohort study using health administrative data. <i>J Palliat Med</i> . 2020 May;23(5):670-677.                                                                                                                                                                                                                                                                                                                                                                                                                                                                                                                                                                                                                                                                                                                                                                                                                                                                       |
| 179. | Jackson (a)                        | 2019 | Jackson R, Wang L, Jembere N, Murphy J, Kupets R. Why do women get cervical cancer in an organized screening program in Canada? <i>Journal of Lower Genital Tract Disease</i> . 2019 Jan 1;23(1):1-6.                                                                                                                                                                                                                                                                                                                                                                                                                                                                                                                                                                                                                                                                                                                                                                                                                                                                                                                                            |
| 180. | Jackson (b)                        | 2019 | Jackson OA, Paine K, Magee L, Maguire MA, Zackai E, McDonald-McGinn DM, et al. Management of velopharyngeal dysfunction in patients with 22q11. 2 deletion syndrome: a                                                                                                                                                                                                                                                                                                                                                                                                                                                                                                                                                                                                                                                                                                                                                                                                                                                                                                                                                                           |

| No.  | First Author | Year | Full Citation or Source                                                                                                                                                                                                                                                                                                                                                                               |
|------|--------------|------|-------------------------------------------------------------------------------------------------------------------------------------------------------------------------------------------------------------------------------------------------------------------------------------------------------------------------------------------------------------------------------------------------------|
|      |              |      | survey of practice patterns. <i>International Journal of Pediatric Otorhinolaryngology</i> . 2019 Jan 1;116:43-8.                                                                                                                                                                                                                                                                                     |
| 181. | Jacobs       | 2013 | Jacobs K, Mathur S, Fraser C, Williams B, Na Y, Wei-Randall H. Canadian Institute for Health Information: analysis in brief. end-stage renal disease among Aboriginal Peoples in Canada: treatment and outcomes; February 2013.                                                                                                                                                                       |
| 182. | Jaglal       | 2014 | Jaglal S, Hawker G, Croxford R, Cameron C, Schott AM, Munce S, et al. Impact of a change in physician reimbursement on bone mineral density testing in Ontario, Canada: a population-based study. <i>CMAJ Open</i> . 2014 Apr;2(2):E45.                                                                                                                                                               |
| 183. | Janzen       | 2019 | Janzen S, Mirkowski M, McIntyre A, Mehta S, Iruthayarajah J, Teasell R. Referral patterns of stroke rehabilitation inpatients to a model system of outpatient services in Ontario, Canada: a 7-year retrospective analysis. <i>BMC Health Services Research</i> . 2019 Dec 1;19(1):399.                                                                                                               |
| 184. | Jetty        | 2012 | Jetty P, Husereau D. Trends in the utilization of endovascular therapy for elective and ruptured abdominal aortic aneurysm procedures in Canada. <i>Journal of Vascular Surgery</i> . 2012 Dec 1;56(6):1518-26.                                                                                                                                                                                       |
| 185. | Jiang        | 2013 | Jiang M, Sewitch MJ, Barkun AN, Joseph L, Hilsden RJ. Endoscopist specialty is associated with colonoscopy quality. <i>BMC Gastroenterology</i> . 2013 Dec;13(1):78.                                                                                                                                                                                                                                  |
| 186. | Jolly        | 2019 | Jolly M, Sethi B, O'Brien C, Sequeira W, Block JA, Toloza S, et al. Drivers of satisfaction with care for patients with lupus. <i>ACR Open Rheumatol</i> . 2019 Nov 6;1(10):649-656. .                                                                                                                                                                                                                |
| 187. | Kakkar       | 2013 | Kakkar AK, Mueller I, Bassand JP, Fitzmaurice DA, Goldhaber SZ, Goto S, Haas S, Hacke W, Lip GY, Mantovani LG, Turpie AG. Risk profiles and antithrombotic treatment of patients newly diagnosed with atrial fibrillation at risk of stroke: perspectives from the international, observational, prospective GARFIELD registry. <i>PloS One</i> . 2013 May 21;8(5):e63479.                            |
| 188. | Karkling     | 2017 | Karkling M, Paul A, Zwicker JG. Occupational therapists' awareness of guidelines for assessment and diagnosis of developmental coordination disorder: Mesure selon laquelle les ergothérapeutes connaissent les lignes directrices relatives à l'évaluation et au diagnostic du trouble du développement de la coordination. <i>Canadian Journal of Occupational Therapy</i> . 2017 Jun;84(3):148-57. |
| 189. | Kendell      | 2020 | Kendell C, Lawson B, Puyat JH, Urquhart R, Kazanjian A, Johnston G, et al. Assessing the quality of care provided to older persons with frailty in five canadian provinces, using administrative data. <i>Can J Aging</i> . 2020 Mar;39(1):52-68.                                                                                                                                                     |

| No.  | First Author | Year | Full Citation or Source                                                                                                                                                                                                                                                                         |
|------|--------------|------|-------------------------------------------------------------------------------------------------------------------------------------------------------------------------------------------------------------------------------------------------------------------------------------------------|
| 190. | Kennedy      | 2015 | Kennedy CC, Ioannidis G, Thabane L, Adachi JD, Marr S, Giangregorio LM, et al. Successful knowledge translation intervention in long-term care: final results from the vitamin D and osteoporosis study (ViD OS) pilot cluster randomized controlled trial. <i>Trials</i> . 2015 Dec;16(1):214. |
| 191. | Kent         | 2018 | Kent AL, Charlton JR, Guillet R, Gist KM, Hanna M, El Samra A, et al. Neonatal acute kidney injury: a survey of neonatologists' and nephrologists' perceptions and practice management. <i>American Journal of Perinatology</i> . 2018 Jan;35(01):001-9.                                        |
| 192. | Kesselring   | 2017 | Kesselring S, Cescon A, Colley G, Osborne C, Zhang W, Raboud JM, et al. Quality of initial HIV care in Canada: extension of a composite programmatic assessment tool for HIV therapy. <i>HIV Medicine</i> . 2017 Mar;18(3):151-60.                                                              |
| 193. | Kilpatrick   | 2020 | Kilpatrick K, Tchouaket É, Jabbour M, Hains S. A mixed methods quality improvement study to implement nurse practitioner roles and improve care for residents in long-term care facilities. <i>BMC Nurs</i> . 2020 Jan 29;19:6.                                                                 |
| 194. | Kinlin       | 2013 | Kinlin LM, Bahm A, Guttmann A, Freedman SB. A survey of emergency department resources and strategies employed in the treatment of pediatric gastroenteritis. <i>Academic Emergency Medicine</i> . 2013 Apr;20(4):361-6.                                                                        |
| 195. | Kitchen      | 2020 | Kitchen SA, McGrail K, Wickham ME, Law MR, Hohl CM. Emergency department-based medication review on outpatient health services utilization: interrupted time series. <i>BMC Health Serv Res</i> . 2020 Mar 26;20(1):254                                                                         |
| 196. | Klein        | 2012 | Klein D, Staples J, Pittman C, Stepanko C. Using electronic clinical practice audits as needs assessment to produce effective continuing medical education programming. <i>Medical Teacher</i> . 2012 Feb 1;34(2):151-4.                                                                        |
| 197. | Kobes        | 2020 | Kobes KJ, Budau-Bymoén A, Thakur Y, Yong-Hing CJ. Multidisciplinary development of mobile radiography guidelines reduced the number of inappropriate mobile exams in patients receiving chest radiographs in British Columbia. <i>Can Assoc Radiol J</i> . 2020 Feb;71(1):110-116.              |
| 198. | Kolber       | 2013 | Kolber MR, Wong CK, Fedorak RN, Rowe BH, APC-Endo Study Physicians. Prospective study of the quality of colonoscopies performed by primary care physicians: the Alberta primary care endoscopy (APC-Endo) study. <i>PloS One</i> . 2013 Jun 27;8(6):e67017.                                     |
| 199. | Kolkhir      | 2018 | Kolkhir P, Pogorelov D, Darlenski R, Caminati M, Tanno LK, Le Pham D, et al. Management of chronic spontaneous urticaria: a worldwide perspective. <i>World Allergy Organization Journal</i> . 2018 Dec 1;11(1):14.                                                                             |

| No.  | First Author | Year | Full Citation or Source                                                                                                                                                                                                                                                                                                       |
|------|--------------|------|-------------------------------------------------------------------------------------------------------------------------------------------------------------------------------------------------------------------------------------------------------------------------------------------------------------------------------|
| 200. | Krakower     | 2016 | Krakower DS, Beekmann SE, Polgreen PM, Mayer KH. Diffusion of newer HIV prevention innovations: variable practices of frontline infectious diseases physicians. <i>Clinical Infectious Diseases</i> . 2016 Jan 1;62(1):99-105.                                                                                                |
| 201. | Kröger       | 2015 | Kröger E, Wilchesky M, Marcotte M, Voyer P, Morin M, Champoux N, et al. Medication use among nursing home residents with severe dementia: identifying categories of appropriateness and elements of a successful intervention. <i>Journal of the American Medical Directors Association</i> . 2015 Jul 1;16(7):629-e1.        |
| 202. | Kumar        | 2019 | Kumar A, Niknam K, Lumba-Brown A, Woodruff M, Bledsoe JR, Kohn MA, et al. Practice variation in the diagnosis of aneurysmal subarachnoid hemorrhage: a survey of US and Canadian emergency medicine physicians. <i>Neurocrit Care</i> . 2019 Oct;31(2):321-328.                                                               |
| 203. | Kunyk        | 2014 | Kunyk D, Els C, Papadakis S, Selby P. Tobacco use disorder treatment in primary care: implementing a clinical system pathway in Alberta. <i>Canadian Family Physician</i> . 2014 Jul 1;60(7):646-55.                                                                                                                          |
| 204. | Kupets       | 2013 | Kupets R, Fernandes K, Miroshnichenko G, Paszat L. Are too many imaging tests being performed in women with an adnexal mass? <i>Journal of Obstetrics and Gynaecology Canada</i> . 2013 Mar 1;35(3):246-51.                                                                                                                   |
| 205. | Kutyifa      | 2015 | Kutyifa V, Moss AJ, Schuger C, Mcnitt S, Polonsky B, Ruwald AC, et al. Reduction in inappropriate ICD therapy in MADIT-RIT patients without history of atrial tachyarrhythmia. <i>Journal of Cardiovascular Electrophysiology</i> . 2015 Aug 1;26(8):879-84.                                                                  |
| 206. | Kutyifa      | 2016 | Kutyifa V, Daubert JP, Schuger C, Goldenberg I, Klein H, Aktas MK, et al. Novel ICD programming and inappropriate ICD therapy in CRT-D versus ICD patients: a MADIT-RIT sub-study. <i>Circulation: Arrhythmia and Electrophysiology</i> . 2016 Jan;9(1):e001965.                                                              |
| 207. | Lam          | 2019 | Lam K, Coomes EA, Nantel-Battista M, Kitchen J, Chan AW. Skin cancer screening after solid organ transplantation: survey of practices in Canada. <i>Am J Transplant</i> . 2019 Jun;19(6):1792-1797.                                                                                                                           |
| 208. | Lam          | 2020 | Lam Shin Cheung J, Paolucci N, Price C, Sykes J, Gupta S; Canadian Respiratory Research Network. A system uptake analysis and GUIDES checklist evaluation of the Electronic Asthma Management System: a point-of-care computerized clinical decision support system. <i>J Am Med Inform Assoc</i> . 2020 May 1;27(5):726-737. |
| 209. | Lander       | 2019 | Lander B, Balka E. Balancing quality improvement and unintended effects: the impact of implementing admission order sets for chronic obstructive pulmonary disease and heart                                                                                                                                                  |

| No.  | First Author | Year | Full Citation or Source                                                                                                                                                                                                                                                                                                                                                                |
|------|--------------|------|----------------------------------------------------------------------------------------------------------------------------------------------------------------------------------------------------------------------------------------------------------------------------------------------------------------------------------------------------------------------------------------|
|      |              |      | failure at two teaching hospitals. <i>Journal of Evaluation in Clinical Practice</i> . 2019 Jun;25(3):469-75.                                                                                                                                                                                                                                                                          |
| 210. | LaPlante     | 2015 | LaPlante NC, Singhal S, Maund J, Quiñonez C. Visits to physicians for oral health-related complaints in Ontario, Canada. <i>Canadian Journal of Public Health</i> . 2015 Mar 1;106(3):e127-31.                                                                                                                                                                                         |
| 211. | Lantz        | 2016 | Lantz AG, McKay J, Ordon M, Pace KT, Monga M, Honey RJ. Shockwave lithotripsy practice pattern variations among and between American and Canadian urologists: in support of guidelines. <i>Journal of Endourology</i> . 2016 Aug 1;30(8):918-22.                                                                                                                                       |
| 212. | Lasa         | 2018 | Lasa JJ, Jain P, Raymond TT, Minard CG, Topjian A, Nadkarni V, et al. Extracorporeal cardiopulmonary resuscitation in the pediatric cardiac population: in search of a standard of care. <i>Pediatric Critical Care Medicine: A Journal of The Society of Critical Care Medicine and the World Federation of Pediatric Intensive and Critical Care Societies</i> . 2018 Feb;19(2):125. |
| 213. | Lawrentschuk | 2011 | Lawrentschuk N, Daljeet N, Ma C, Hersey K, Zlotta A, Fleshner N. Prostate-specific antigen test result interpretation when combined with risk factors for recommendation of biopsy: a survey of urologist's practice patterns. <i>International Urology and Nephrology</i> . 2011 Mar 1;43(1):31-7.                                                                                    |
| 214. | LeBlanc      | 2011 | LeBlanc E, O'Connor E, Whitlock EP, Patnode C, Kapka T. Screening for and management of obesity and overweight in adults. evidence report no. 89. AHRQ Publication No. 11-05159-EF-1. Rockville, MD: Agency for Healthcare Research and Quality; October 2011.                                                                                                                         |
| 215. | Lee          | 2020 | Lee SK, Beltempo M, McMillan DD, Seshia M, Singhal N, Dow K, et al. Outcomes and care practices for preterm infants born at less than 33 weeks' gestation: a quality-improvement study. <i>CMAJ</i> . 2020 Jan 27;192(4):E81-E91.                                                                                                                                                      |
| 216. | Leis         | 2020 | Leis JA, Powis JE, McGeer A, Ricciuto DR, Agnihotri T, Coyle N, et al. Introduction of group electronic monitoring of hand hygiene on inpatient units: a multicenter cluster randomized quality improvement study. <i>Clin Infect Dis</i> . 2020 Apr 9:ciaa412.                                                                                                                        |
| 217. | Li           | 2015 | Li M, Kennedy EB, Byrne N, Gerin-Lajoie C, Green E, Katz MR, et al. Management of depression in patients with cancer. 2015. Available from: <a href="https://www.cancercareontario.ca/en/content/management-depression-patients-cancer">https://www.cancercareontario.ca/en/content/management-depression-patients-cancer</a>                                                          |



| No.  | First Author  | Year | Full Citation or Source                                                                                                                                                                                                                                        |
|------|---------------|------|----------------------------------------------------------------------------------------------------------------------------------------------------------------------------------------------------------------------------------------------------------------|
| 218. | Liddy         | 2015 | Liddy C, Hogg W, Singh J, Taljaard M, Russell G, Armstrong CD, et al. A real-world stepped wedge cluster randomized trial of practice facilitation to improve cardiovascular care. <i>Implementation Science</i> . 2015 Dec;10(1):150.                         |
| 219. | Lin           | 2013 | Lin D, Worster A. Predictors of admission to hospital of patients triaged as nonurgent using the Canadian Triage and Acuity Scale. <i>Canadian Journal of Emergency Medicine</i> . 2013 Nov;15(6):353-8.                                                       |
| 220. | Liu           | 2020 | Liu C, Cheifetz R, Brown C, Nichol A, Speers C, Lohrisch C, et al. Do surgeons convey all the details? A provincial assessment of operative reporting for breast cancer. <i>Am J Surg</i> . 2020 May;219(5):780-784.                                           |
| 221. | Lofters       | 2019 | Lofters AK, McBride ML, Li D, Whitehead M, Moineddin R, Jiang L, et al. Disparities in breast cancer diagnosis for immigrant women in Ontario and BC: results from the CanIMPACT study. <i>BMC Cancer</i> . 2019 Dec 1;19(1):42.                               |
| 222. | Luctkar-Flude | 2015 | Luctkar-Flude M, Aiken A, McColl MA, Tranmer J, Langley H. Are primary care providers implementing evidence-based care for breast cancer survivors?. <i>Canadian Family Physician</i> . 2015 Nov 1;61(11):978-84.                                              |
| 223. | Lum           | 2016 | Lum DA, Sokol ER, Berek JS, Schulkin J, Chen L, McElwain CA, et al. Impact of the 2014 Food and Drug Administration warnings against power morcellation. <i>Journal of Minimally Invasive Gynecology</i> . 2016 May 1;23(4):548-56.                            |
| 224. | Ma            | 2019 | Ma B, Allen DW, Graham MM, Har BJ, Tyrrell B, Tan Z, et al. Comparative performance of prediction models for contrast-associated acute kidney injury after percutaneous coronary intervention. <i>Circ Cardiovasc Qual Outcomes</i> . 2019 Nov;12(11):e005854. |
| 225. | MacIntyre     | 2019 | MacIntyre CJ, Sapp JL, Abdelwahab A, Al-Harbi M, Doucette S, Gray C, et al. The effect of shock burden on heart failure and mortality. <i>CJC Open</i> . 2019 Jun 7;1(4):161-167.                                                                              |
| 226. | Mangin        | 2018 | Mangin D, Lawson J, Cuppage J, Shaw E, Ivanyi K, Davis A, et al. Legacy drug-prescribing patterns in primary care. <i>The Annals of Family Medicine</i> . 2018 Nov 1;16(6):515-20.                                                                             |
| 227. | Manns (a)     | 2012 | Manns B, Laupland K, Tonelli M, Gao S, Hemmelgarn B. Evaluating the impact of a novel restricted reimbursement policy for quinolone antibiotics: a time series analysis. <i>BMC Health Services Research</i> . 2012 Dec;12(1):290.                             |
| 228. | Manns (b)     | 2012 | Manns B, Tonelli M, Culleton B, Faris P, McLaughlin K, Chin R, et al. A cluster randomized trial of an enhanced eGFR prompt in chronic kidney disease. <i>Clinical Journal of the American Society of Nephrology</i> . 2012 Apr 1;7(4):565-72.                 |

| No.  | First Author                 | Year | Full Citation or Source                                                                                                                                                                                                                                                                                                                                                                                  |
|------|------------------------------|------|----------------------------------------------------------------------------------------------------------------------------------------------------------------------------------------------------------------------------------------------------------------------------------------------------------------------------------------------------------------------------------------------------------|
| 229. | Marcus                       | 2019 | Marcus L, Mackeigan L, Leblanc K, Orlov D, Mitsakakis N, Austin Z, et al. Cardiologists' and nephrologists' management of atrial fibrillation in hemodialysis patients <sup>[P]</sup> . <i>Clin Nephrol</i> . 2019 Nov;92(5):226-232.                                                                                                                                                                    |
| 230. | Matava                       | 2011 | Matava C, Hayes J. A survey of ultrasound use by academic and community anesthesiologists in Ontario. <i>Canadian Journal of Anesthesia/Journal Canadien d'Anesthésie</i> . 2011 Oct 1;58(10):929.                                                                                                                                                                                                       |
| 231. | McIntyre                     | 2016 | McIntyre L, Rowe BH, Walsh TS, Gray A, Arabi Y, Perner A, et al. Multicountry survey of emergency and critical care medicine physicians' fluid resuscitation practices for adult patients with early septic shock. <i>BMJ Open</i> . 2016 Jul 1;6(7):e010041.                                                                                                                                            |
| 232. | McIsaac                      | 2017 | McIsaac WJ, Moineddin R, Gágyor I, Mazzulli T. External validation study of a clinical decision aid to reduce unnecessary antibiotic prescriptions in women with acute cystitis. <i>BMC Family Practice</i> . 2017 Dec 1;18(1):89.                                                                                                                                                                       |
| 233. | McKay                        | 2019 | McKay R, Law M, McGrail K, Balshaw R, Reyes R, Patrick DM. What can we learn by examining variations in the use of urine culture in the management of acute cystitis? a retrospective cohort study with linked administrative data in British Columbia, Canada, 2005-2011. <i>PloS One</i> . 2019;14(3).                                                                                                 |
| 234. | McLeod                       | 2015 | McLeod RS, Aarts MA, Chung F, Eskicioglu C, Forbes SS, Conn LG, et al. Development of an enhanced recovery after surgery guideline and implementation strategy based on the knowledge-to-action cycle. <i>Annals of Surgery</i> . 2015 Dec 1;262(6):1016-25.                                                                                                                                             |
| 235. | Medical Advisory Secretariat | 2009 | Medical Advisory Secretariat. Diabetes strategy evidence platform: a summary of evidence-based analyses. Ontario Health Technology Assessment Series 2009;9(19). Available from: <a href="http://www.hqontario.ca/english/providers/program/mas/tech/reviews/pdf/rev_diabetes_sum_20091020.pdf">http://www.hqontario.ca/english/providers/program/mas/tech/reviews/pdf/rev_diabetes_sum_20091020.pdf</a> |
| 236. | Merchant                     | 2017 | Merchant SJ, Nanji S, Brennan K, Karim S, Patel SV, Biagi JJ, et al. Management of stage III colon cancer in the elderly: practice patterns and outcomes in the general population. <i>Cancer</i> . 2017 Aug 1;123(15):2840-9.                                                                                                                                                                           |
| 237. | Merchant                     | 2020 | Merchant RN. Slated versus actual operating room entry time in a British Columbia health authority. <i>Can J Anaesth</i> . 2020 Jun;67(6):726-731.                                                                                                                                                                                                                                                       |
| 238. | Merdad                       | 2014 | Merdad M, Eskander A, De Almeida J, Freeman J, Rotstein L, Ezzat S, et al. Current management of papillary thyroid microcarcinoma in Canada. <i>Journal of Otolaryngology-Head &amp; Neck Surgery</i> . 2014 Dec;43(1):32.                                                                                                                                                                               |

| No.  | First Author                          | Year | Full Citation or Source                                                                                                                                                                                                                                                                                                                                                                                                                                   |
|------|---------------------------------------|------|-----------------------------------------------------------------------------------------------------------------------------------------------------------------------------------------------------------------------------------------------------------------------------------------------------------------------------------------------------------------------------------------------------------------------------------------------------------|
| 239. | MHASEF Research Team                  | 2015 | MHASEF Research Team. The mental health of children and youth in Ontario: a baseline scorecard. Toronto, ON: Institute for Clinical Evaluative Sciences; 2015.                                                                                                                                                                                                                                                                                            |
| 240. | MHASEF Research Team                  | 2017 | MHASEF Research Team. The mental health of children and youth in Ontario: 2017 Scorecard. Toronto, ON: Institute for Clinical Evaluative Sciences; 2017.                                                                                                                                                                                                                                                                                                  |
| 241. | MHASEF Research Team                  | 2018 | MHASEF Research Team. Mental health and addictions system performance in Ontario: a baseline scorecard. Toronto, ON: Institute for Clinical Evaluative Sciences; 2018.                                                                                                                                                                                                                                                                                    |
| 242. | Miller                                | 2018 | Miller RJ, Chew DS, Rezazadeh S, Klassen S, Pournazari P, Lang E, et al. Factors influencing oral anticoagulation prescription for patients presenting to emergency departments with atrial fibrillation and flutter. <i>Canadian Journal of Cardiology</i> . 2018 Jun 1;34(6):804-7.                                                                                                                                                                     |
| 243. | Ministry of Health and Long-Term Care | 2013 | Ministry of Health and Long-Term Care. Rehabilitation services at hospitals - follow-up to VFM Section 3.08, 2013 annual report. In: 2015 annual report of the office of the Auditor General of Ontario. 2015. Available from: <a href="http://www.auditor.on.ca/en/content/annualreports/arreports/en15/4.08en15.pdf">http://www.auditor.on.ca/en/content/annualreports/arreports/en15/4.08en15.pdf</a>                                                  |
| 244. | Moraescu                              | 2012 | Moraescu E, Champoux N. Étude sur l'usage des antipsychotiques. Une production de l'Institut national d'excellence en santé et en services sociaux. 2012. Available from: <a href="https://www.inesss.qc.ca/fileadmin/doc/INESSS/Rapports/Medicaments/ETMIS2012_Vol8_No11.pdf">https://www.inesss.qc.ca/fileadmin/doc/INESSS/Rapports/Medicaments/ETMIS2012_Vol8_No11.pdf</a>                                                                             |
| 245. | Morkem                                | 2015 | Morkem R, Barber D, Williamson T, Patten SB. A Canadian primary care sentinel surveillance network study evaluating antidepressant prescribing in Canada from 2006 to 2012. <i>The Canadian Journal of Psychiatry</i> . 2015 Dec;60(12):564-70.                                                                                                                                                                                                           |
| 246. | Morkem                                | 2017 | Morkem R, Williamson T, Patten S, Queenan JA, Wong ST, Manca D, et al. Trends in antidepressant prescribing to children and adolescents in Canadian primary care: A time-series analysis. <i>Pharmacoepidemiology and Drug Safety</i> . 2017 Sep;26(9):1093-9.                                                                                                                                                                                            |
| 247. | Morrison                              | 2013 | Morrison A. Appropriate utilization of advanced diagnostic imaging procedures: CT, MRI, and PET/CT. [Environmental Scan, Issue 39]. Ottawa: Canadian Agency for Drugs and Technologies in Health. 2013. Revised 2015 Mar. Available from: <a href="https://cadth.ca/appropriate-utilization-advanced-diagnostic-imaging-procedures-ct-mri-and-petct">https://cadth.ca/appropriate-utilization-advanced-diagnostic-imaging-procedures-ct-mri-and-petct</a> |
| 248. | Moulson                               | 2017 | Moulson N, McIntyre WF, Oqab Z, Yazdan-Ashoori P, Quinn KL, van Oosten E, et al. The anticoagulation choices of internal medicine residents for stroke prevention in non-valvular atrial fibrillation. <i>Postgraduate Medical Journal</i> . 2017 Jun 1;93(1100):308-12.                                                                                                                                                                                  |

| No.  | First Author                 | Year | Full Citation or Source                                                                                                                                                                                                                                                                                                                                                                                                                                                 |
|------|------------------------------|------|-------------------------------------------------------------------------------------------------------------------------------------------------------------------------------------------------------------------------------------------------------------------------------------------------------------------------------------------------------------------------------------------------------------------------------------------------------------------------|
| 249. | Murray                       | 2018 | Murray S, Labbé S, Kaplan A, Petrasko K, Wasserman S. A multi-stakeholder perspective on asthma care in Canada: findings from a mixed methods needs assessment in the treatment and management of asthma in adults. <i>Allergy, Asthma &amp; Clinical Immunology</i> . 2018 Dec 1;14(1):36.                                                                                                                                                                             |
| 250. | Nanji                        | 2012 | Nanji JA, Choi M, Ferrari R, Lyddell C, Russell AS. Time to consultation and disease-modifying antirheumatic drug treatment of patients with rheumatoid arthritis—northern Alberta perspective. <i>The Journal of Rheumatology</i> . 2012 Apr 1;39(4):707-11.                                                                                                                                                                                                           |
| 251. | Nash                         | 2019 | Nash DM, Dirk JS, McArthur E, Green ME, Shah BR, Walker JD, et al. Kidney disease and care among First Nations people with diabetes in Ontario: a population-based cohort study. <i>CMAJ Open</i> . 2019 Dec 10;7(4):E706-E712.                                                                                                                                                                                                                                         |
| 252. | Neuman                       | 2019 | Neuman MD, Bateman BT, Wunsch H. Inappropriate opioid prescription after surgery. <i>The Lancet</i> . 2019 Apr 13;393(10180):1547-57.                                                                                                                                                                                                                                                                                                                                   |
| 253. | New Brunswick Health Council | 2008 | New Brunswick Health Council. Chronic conditions and health service quality: are we meeting the need? 2016. Available from: <a href="https://nbhc.ca/sites/default/files/publications-attachments/chronic%20conditions%20and%20health%20service%20quality%20-%20are%20we%20meeting%20the%20need.pdf">https://nbhc.ca/sites/default/files/publications-attachments/chronic%20conditions%20and%20health%20service%20quality%20-%20are%20we%20meeting%20the%20need.pdf</a> |
| 254. | New Brunswick Health Council | 2011 | New Brunswick Health Council. Quality and outcome-related measures: what are we learning from New Brunswick's primary health care survey? 2011. Available from: <a href="https://nbhc.ca/sites/default/files/publications-attachments/NBHC_Primary_Health_Care_Report_Part_2_0.pdf">https://nbhc.ca/sites/default/files/publications-attachments/NBHC_Primary_Health_Care_Report_Part_2_0.pdf</a>                                                                       |
| 255. | Newville                     | 2015 | Newville H, Roley J, Sorensen JL. Prescription medication misuse among HIV-infected individuals taking antiretroviral therapy. <i>Journal of Substance Abuse Treatment</i> . 2015 Jan 1;48(1):56-61.                                                                                                                                                                                                                                                                    |
| 256. | Nijjar                       | 2011 | Nijjar SS, Pink L, Gordon AS. Examination of migraine management in emergency departments. <i>Pain Research and Management</i> . 2011;16(3):183-6.                                                                                                                                                                                                                                                                                                                      |
| 257. | Nova Scotia Health Authority | 2017 | Primary Health Care, Nova Scotia Health Authority. Strengthening the primary health care system in Nova Scotia.evidence synthesis and guiding document for primary care delivery: collaborative family practice teams and health homes. Nova Scotia: Primary Health Care, Nova Scotia Health Authority.                                                                                                                                                                 |
| 258. | O'Brien                      | 2020 | O'Brien N, Godard-Sebillotte C, Skerritt L, Dayle J, Carter A, Law S, et al. Assessing gaps in comprehensive HIV Care across settings of care for women living with HIV in Canada. <i>J Womens Health (Larchmt)</i> . 2020 Jun 5. [Epub ahead of print].                                                                                                                                                                                                                |

| No.  | First Author | Year | Full Citation or Source                                                                                                                                                                                                                                                                                                                            |
|------|--------------|------|----------------------------------------------------------------------------------------------------------------------------------------------------------------------------------------------------------------------------------------------------------------------------------------------------------------------------------------------------|
| 259. | Okelo        | 2014 | Okelo SO, Siberry GK, Solomon BS, Bilderback AL, Yamazaki M, Hetzler T, et al. Asthma treatment decisions by pediatric residents do not consistently conform to guidelines or improve with level of training. <i>Academic Pediatrics</i> . 2014 May 1;14(3):287-93.                                                                                |
| 260. | Olajos-Clow  | 2009 | Olajos-Clow J, Szpiro K, Julien B, Minard J, Lougheed MD. Emergency department adult asthma care pathway: healthcare providers' perceived utility and barriers to implementation. <i>Advanced Emergency Nursing Journal</i> . 2009 Jan 1;31(1):44-53.                                                                                              |
| 261. | Ong-Tone     | 2010 | Ong-Tone L, Bell A. Practice patterns of Canadian Ophthalmological Society members in cataract surgery—2009 survey. <i>Canadian Journal of Ophthalmology</i> . 2010 Jan 1;45(2):121-4.                                                                                                                                                             |
| 262. | Ong-Tone     | 2011 | Ong-Tone L, Bell A, Tan YY. Practice patterns of Canadian Ophthalmological Society members in cataract surgery—2010 survey. <i>Canadian Journal of Ophthalmology</i> . 2011 Apr 1;46(2):139-42.                                                                                                                                                    |
| 263. | Ong-Tone     | 2012 | Ong-Tone L, Bell A, Tan YY. Practice patterns of Canadian Ophthalmological Society members in cataract surgery: 2011 survey. <i>Canadian Journal of Ophthalmology</i> . 2012 Apr 1;47(2):124-30.                                                                                                                                                   |
| 264. | Osman        | 2016 | Osman O, Sherifali D, Stolee P, Heckman G. Diabetes management in long-term care: an exploratory study of the current practices and processes to managing frail elderly persons with type 2 diabetes. <i>Canadian Journal of Diabetes</i> . 2016 Feb 1;40(1):17-30.                                                                                |
| 265. | Papadakis    | 2014 | Papadakis S, Gharib M, Hambleton J, Reid RD, Assi R, Pipe AL. Delivering evidence-based smoking cessation treatment in primary care practice: experience of Ontario family health teams. <i>Canadian Family Physician</i> . 2014 Jul 1;60(7):e362-71.                                                                                              |
| 266. | Pasay        | 2019 | Pasay DK, Guirguis MS, Shkrobot RC, Slobodan JP, Wagg AS, Sadowski CA, et al. Antimicrobial stewardship in rural nursing homes: impact of interprofessional education and clinical decision tool implementation on urinary tract infection treatment in a cluster randomized trial. <i>Infect Control Hosp Epidemiol</i> . 2019 Apr;40(4):432-437. |
| 267. | Patel        | 2017 | Patel AR, Campbell JR, Sadatsafavi M, Marra F, Johnston JC, Smillie K, et al. Burden of non-adherence to latent tuberculosis infection drug therapy and the potential cost-effectiveness of adherence interventions in Canada: a simulation study. <i>BMJ Open</i> . 2017 Sep 1;7(9):e015108.                                                      |
| 268. | Patte        | 2020 | Patte KA, Faulkner G, Qian W, Duncan M, Leatherdale ST. Are one-year changes in adherence to the 24-hour movement guidelines associated with depressive symptoms among youth? <i>BMC Public Health</i> . 2020 May 27;20(1):793.                                                                                                                    |

| No.  | First Author | Year | Full Citation or Source                                                                                                                                                                                                                                                                                                                        |
|------|--------------|------|------------------------------------------------------------------------------------------------------------------------------------------------------------------------------------------------------------------------------------------------------------------------------------------------------------------------------------------------|
| 269. | Paul         | 2020 | Paul JE, Zhu KY, Meckler GD, Park DK, Doan Q. Assessing appropriateness of pediatric emergency department visits: is it even possible? <i>CJEM</i> . 2020 Sep;22(5):661-664.                                                                                                                                                                   |
| 270. | Peters       | 2018 | Peters B, Giuffre JL. Canadian trends in carpal tunnel surgery. <i>The Journal of Hand Surgery</i> . 2018 Nov 1;43(11):1035-e1.                                                                                                                                                                                                                |
| 271. | Phillips     | 2016 | Phillips K. Improving dementia care: results from a pan-Canadian collaborative to reduce inappropriate prescribing of antipsychotics in long-term care. <i>Alzheimer's &amp; Dementia: The Journal of the Alzheimer's Association</i> . 2016 Jul 1;12(7):P263-4.                                                                               |
| 272. | Popadiuk     | 2012 | Popadiuk C, Stankiewicz A, Dickinson J, Pogany L, Miller AB, Onysko J. Invasive cervical cancer incidence and mortality among canadian women aged 15 to 29 and the impact of screening. <i>Journal of Obstetrics and Gynaecology Canada</i> . 2012 Dec 1;34(12):1167-76.                                                                       |
| 273. | Putnam       | 2009 | Putnam W, Buhariwalla F, Lacey K, Goodfellow M, Goodine RA, Hall J, et al. Drug management for hypertension in type 2 diabetes in family practice. <i>Canadian Family Physician</i> . 2009 Jul 1;55(7):728-34.                                                                                                                                 |
| 274. | Qiang        | 2019 | Qiang JK, Thompson T, Callum J, Pinkerton P, Lin Y. Variations in RBC and frozen plasma utilization rates across 62 Ontario community hospitals. <i>Transfusion</i> . 2019 Feb;59(2):545-54.                                                                                                                                                   |
| 275. | Quinn        | 2019 | Quinn KL, Campitelli MA, Diong C, Daneman N, Stall NM, Morris AM, et al. Association between physician intensity of antibiotic prescribing and the prescription of benzodiazepines, opioids and proton-pump inhibitors to nursing home residents: a population-based observational study. <i>J Gen Intern Med</i> . 2019 Dec;34(12):2763-2771. |
| 276. | Rahme        | 2012 | Rahme E, Roussy JP, Lafrance JP, Nedjar H, Morin S. Concordance with guideline recommendations: previous and more recent nonsteroidal anti-inflammatory drug prescriptions in Quebec, Canada. <i>Pharmacoepidemiology and Drug Safety</i> . 2012 Apr;21(4):420-7.                                                                              |
| 277. | Raphael      | 2020 | Raphael MJ, Ko G, Booth CM, Brogly SB, Li W, Kalyvas M, et al. Factors associated with chemoradiation therapy interruption and noncompletion among patients with squamous cell anal carcinoma. <i>JAMA Oncol</i> . 2020 Jun 1;6(6):881-887.                                                                                                    |
| 278. | Ratnasingham | 2012 | Ratnasingham S, Cairney J, Rehm J, Manson H, Kurdyak PA. Opening eyes, opening minds: the Ontario burden of mental illness and addictions report. Toronto: Institute for Clinical Evaluative Sciences and Public Health Ontario; 2012.                                                                                                         |

| No.  | First Author         | Year | Full Citation or Source                                                                                                                                                                                                                                                                    |
|------|----------------------|------|--------------------------------------------------------------------------------------------------------------------------------------------------------------------------------------------------------------------------------------------------------------------------------------------|
| 279. | Rej                  | 2017 | Rej S, Herrmann N, Shulman K, Fischer HD, Fung K, Gruneir A. Current psychotropic medication prescribing patterns in late-life bipolar disorder. <i>International Journal of Geriatric Psychiatry</i> . 2017 Dec;32(12):1459-65.                                                           |
| 280. | Reppas-Rindlisbacher | 2016 | Reppas-Rindlisbacher CE, Fischer HD, Fung K, Gill SS, Seitz D, Tannenbaum C, et al. Anticholinergic drug burden in persons with dementia taking a cholinesterase inhibitor: the effect of multiple physicians. <i>Journal of the American Geriatrics Society</i> . 2016 Mar;64(3):492-500. |
| 281. | Richard              | 2017 | Richard PO, Jewett MA, Tanguay S, Saarela O, Liu ZA, Pouliot F, et al. Safety, reliability and accuracy of small renal tumour biopsies: results from a multi-institution registry. <i>BJU International</i> . 2017 Apr;119(4):543-9.                                                       |
| 282. | Richards             | 2019 | Richards CL, Malouin F, Nadeau S, Fung J, D'Amours L, Perez C, et al. Development, implementation, and clinician adherence to a standardized assessment toolkit for sensorimotor rehabilitation after stroke. <i>Physiotherapy Canada</i> . 2019 Feb 12;71(1):43-55.                       |
| 283. | Rinfret              | 2009 | Rinfret S, Lussier MT, Peirce A, Duhamel F, Cossette S, Lalonde L, et al. The impact of a multidisciplinary information technology-supported program on blood pressure control in primary care. <i>Circulation: Cardiovascular Quality and Outcomes</i> . 2009 May;2(3):170-7.             |
| 284. | Rios                 | 2017 | Rios S, Perlman CM, Costa A, Heckman G, Hirdes JP, Mitchell L. Antipsychotics and dementia in Canada: a retrospective cross-sectional study of four health sectors. <i>BMC Geriatrics</i> . 2017 Dec;17(1):244.                                                                            |
| 285. | Robinson             | 2018 | Robinson A, Romao R, Mills J, Davies DA. Decision-making criteria for observational management of congenital pulmonary airway malformations (CPAMs). <i>Journal of Pediatric Surgery</i> . 2018 May 1;53(5):1006-9.                                                                        |
| 286. | Ronsley              | 2013 | Ronsley R, Scott D, Warburton WP, Hamdi RD, Louie DC, Davidson J, et al. A population-based study of antipsychotic prescription trends in children and adolescents in British Columbia, from 1996 to 2011. <i>The Canadian Journal of Psychiatry</i> . 2013 Jun;58(6):361-9.               |
| 287. | Rose (a)             | 2018 | Rose L, McKim D, Leasa D, Nonoyama M, Tandon A, Bai YQ, et al. Patterns of healthcare utilisation for respiratory complications of adults with neuromuscular disease: a population study. <i>European Respiratory Journal</i> . 2018 Sep 1;52(3):1800754.                                  |
| 288. | Rose (b)             | 2018 | Rose L, McKim D, Leasa D, Nonoyama M, Tandon A, Bai YQ, et al. Respiratory health service utilization of children with neuromuscular disease. <i>Pediatric Pulmonology</i> . 2018 Oct;53(10):1378-86.                                                                                      |

| No.  | First Author   | Year | Full Citation or Source                                                                                                                                                                                                                                                                                                                                                                             |
|------|----------------|------|-----------------------------------------------------------------------------------------------------------------------------------------------------------------------------------------------------------------------------------------------------------------------------------------------------------------------------------------------------------------------------------------------------|
| 289. | Ross           | 2020 | Ross J, Breau RH, McAlpine K, Rowe N, Williams L, Knee C, et al. A novel prevention bundle to reduce incisional infections after radical cystectomy. <i>Urol Oncol</i> . 2020 Jul;38(7):638.e1-638.e6.                                                                                                                                                                                              |
| 290. | Ruel-Laliberté | 2020 | Ruel-Laliberté J, Binette A, Bertrand A. Salpingectomie bilatérale aux fins de contraception permanente : série de cas et facteurs limitant le changement de pratique. <i>J Obstet Gynaecol Can</i> . 2020 Aug;42(8):948-952. doi: 10.1016/j.jogc.2020.02.004.                                                                                                                                      |
| 291. | Rugge          | 2011 | Rugge B, Balslem H, Sehgal R, Relevo R, Gorman P, Helfand M. Screening and treatment of subclinical hypothyroidism or hyperthyroidism. Comparative effectiveness review No. 24. Rockville, MD: Agency for Healthcare Research and Quality. October 2011. Available at: <a href="http://www.effectivehealthcare.ahrq.gov/reports/final.cfm">www.effectivehealthcare.ahrq.gov/reports/final.cfm</a> . |
| 292. | Sacher         | 2015 | Sacher AG, Le LW, Lau A, Earle CC, Leighl NB. Real-world chemotherapy treatment patterns in metastatic non-small cell lung cancer: are patients undertreated? <i>Cancer</i> . 2015 Aug 1;121(15):2562-9.                                                                                                                                                                                            |
| 293. | Salagame       | 2020 | Salagame U, Kliewer EV, Demers A, Banks E, Velentzis LS, Goldsbury D, et al. Trends in prescribing menopausal hormone therapy and bisphosphonates in Australia and Manitoba, Canada and adherence to recommendations. <i>J Womens Health (Larchmt)</i> . 2020 Feb;29(2):177-186.                                                                                                                    |
| 294. | Samuel         | 2019 | Samuel SM, Dart A, Filler G, Bitzan M, Pinski M, Mammen C, et al. The Canadian childhood nephrotic syndrome (CHILDNEPH) study: report on mid-study feasibility, recruitment and main measures. <i>BMC Nephrol</i> . 2019 May 14;20(1):159.                                                                                                                                                          |
| 295. | Sanyal         | 2020 | Sanyal C, Turner JP, Martin P, Tannenbaum C. Cost-effectiveness of pharmacist-led deprescribing of NSAIDs in community-dwelling older adults. <i>J Am Geriatr Soc</i> . 2020 May;68(5):1090-1097.                                                                                                                                                                                                   |
| 296. | Saposnik       | 2019 | Saposnik G, Menon BK, Kashani N, Wilson AT, Yoshimura S, Campbell BCV, et al. Factors associated with the decision-making on endovascular thrombectomy for the management of acute ischemic stroke. <i>Stroke</i> . 2019 Sep;50(9):2441-2447.                                                                                                                                                       |
| 297. | Sauro          | 2018 | Sauro KM, Wiebe S, Holroyd-Leduc J, DeCoster C, Quan H, Bell M, Jetté N. Knowledge translation of clinical practice guidelines among neurologists: A mixed-methods study. <i>PloS one</i> . 2018;13(10).                                                                                                                                                                                            |
| 298. | Sauro          | 2019 | Sauro KM, Jetté N, Quan H, Holroyd-Leduc J, DeCoster C, Wiebe S. Improving knowledge translation of clinical practice guidelines for epilepsy. <i>Epilepsy &amp; Behavior</i> . 2019 Mar 1;92:265-8.                                                                                                                                                                                                |



| No.  | First Author | Year | Full Citation or Source                                                                                                                                                                                                                                                                                                                                                      |
|------|--------------|------|------------------------------------------------------------------------------------------------------------------------------------------------------------------------------------------------------------------------------------------------------------------------------------------------------------------------------------------------------------------------------|
| 299. | Sanders      | 2019 | Sanders S, Chua N, Larouche JF, Owen C, Shafey M, Stewart DA. Outcomes of consecutively diagnosed primary central nervous system lymphoma patients using the Alberta lymphoma clinical practice guideline incorporating thiotepa-busulfan conditioning for transplantation-eligible patients. <i>Biology of Blood and Marrow Transplantation</i> . 2019 Aug 1;25(8):1505-10. |
| 300. | Schwalm      | 2015 | Schwalm JD, Ivers NM, Natarajan MK, Taljaard M, Rao-Melacini P, Witteman HO, et al. Cluster randomized controlled trial of delayed educational reminders for long-term medication adherence in ST-elevation myocardial infarction (DERLA-STEMI). <i>American Heart Journal</i> . 2015 Nov 1;170(5):903-13.                                                                   |
| 301. | Sears        | 2019 | Sears K, Elms S, Whitehead M, Tranmer JE, Edge DS, VanDenKerkhof EG. A population-based study of prescribing trends in a potentially vulnerable paediatric population from 1999 to 2012. <i>Int J Pharm Pract</i> . 2019 Dec;27(6):545-554.                                                                                                                                  |
| 302. | Sénécal      | 2009 | Sénécal M, Fodor G, Gagné C, Genest J, Lavoie MA, McPherson R, et al. Limitations of statin monotherapy for the treatment of dyslipidemia: a projection based on the Canadian lipid study—observational. <i>Current Medical Research and Opinion</i> . 2009 Jan 1;25(1):47-55.                                                                                               |
| 303. | Shah         | 2014 | Shah BR, Bhattacharyya O, Catherine HY, Mamdani MM, Parsons JA, Straus SE, et al. Effect of an educational toolkit on quality of care: a pragmatic cluster randomized trial. <i>PLoS Medicine</i> . 2014 Feb 4;11(2):e1001588.                                                                                                                                               |
| 304. | Shaheen      | 2020 | Shaheen AA, Riazi K, Medellin A, Bhayana D, Kaplan GG, Jiang J, et al. Risk stratification of patients with nonalcoholic fatty liver disease using a case identification pathway in primary care: a cross-sectional study. <i>CMAJ Open</i> . 2020 May 15;8(2):E370-E376.                                                                                                    |
| 305. | Sharma       | 2017 | Sharma P, Finley R, Weese S, Glass-Kaasta S, McIsaac W. Antibiotic prescriptions for outpatient acute rhinosinusitis in Canada, 2007-2013. <i>PLoS One</i> 2017;12(7):e0181957. 2017                                                                                                                                                                                         |
| 306. | Shaver       | 2020 | Shaver NS, Lapenskie J, Smith GA, Hsu AT, Liddy C, Tanuseputro P. How often, where, and by which specialty do long-term care home residents receive specialist physician care? a retrospective cohort study. <i>J Appl Gerontol</i> . 2020 Feb 6:733464819901255. [Epub ahead of print].                                                                                     |
| 307. | Spence       | 2014 | Spence J, Bell DD, Garland A. Variation in diagnostic testing in ICUs: a comparison of teaching and nonteaching hospitals in a regional system. <i>Critical Care Medicine</i> . 2014 Jan 1;42(1):9-16.                                                                                                                                                                       |

| No.  | First Author | Year | Full Citation or Source                                                                                                                                                                                                                                                                                                          |
|------|--------------|------|----------------------------------------------------------------------------------------------------------------------------------------------------------------------------------------------------------------------------------------------------------------------------------------------------------------------------------|
| 308. | Stacey       | 2020 | Stacey D, Ludwig C, Jolicoeur L, Carley M, Balchin K, Jibb L, et al. Quality of telephone-based cancer symptom management by nurses: a quality improvement project. <i>Support Care Cancer</i> . 2020 Jun 4. [Epub ahead of print].                                                                                              |
| 309. | Stevens      | 2020 | Stevens T, Keller H, Williams N, Downar J, Guthrie DM. Cross-sectional nutrition profile of palliative home care clients in ontario and performance of the interRAI palliative care nutrition clinical assessment protocol. <i>JPEN J Parenter Enteral Nutr</i> . 2020 Apr 8. [Epub ahead of print].                             |
| 310. | Stewart      | 2019 | Stewart E, Sun I, Kim C, Giddings A, Silverio F, Taruc O, et al. Examining radiation treatment appointment times at a canadian cancer centre: a timing study. <i>J Med Imaging Radiat Sci</i> . 2019 Dec;50(4):536-542.                                                                                                          |
| 311. | Stiell       | 2009 | Stiell IG, Clement CM, Grimshaw J, Brison RJ, Rowe BH, Schull MJ, et al. Implementation of the Canadian C-Spine Rule: prospective 12 centre cluster randomised trial. <i>BMJ</i> . 2009 Oct 29; 339: b4146.                                                                                                                      |
| 312. | Stoller      | 2014 | Stoller J, Carson JD, Garel A, Libfeld P, Snow CL, Law M, et al. Do family physicians, emergency department physicians, and pediatricians give consistent sport-related concussion management advice? <i>Canadian Family Physician</i> . 2014 Jun 1;60(6):548-52.                                                                |
| 313. | Tam-Tham     | 2019 | Tam-Tham H, Clement F, Hemmelgarn BR, Manns BJ, Klarenbach SW, Tonelli M, et al. A cost analysis and cost-utility analysis of a community pharmacist-led intervention on reducing cardiovascular risk: the Alberta vascular risk reduction community pharmacy project (RxEACH). <i>Value Health</i> . 2019 Oct;22(10):1128-1136. |
| 314. | Tan          | 2016 | Tan C, Vermeulen M, Wang X, Zvonar R, Garber G, Daneman N. Variability in antibiotic use across Ontario acute care hospitals. <i>Journal of Antimicrobial Chemotherapy</i> . 2016 Nov 17;72(2):554-63.                                                                                                                           |
| 315. | Tan          | 2017 | Tan VF, Patlas MN, Katz DS. Imaging trends in suspected appendicitis—a Canadian perspective. <i>Emergency Radiology</i> . 2017 Jun 1;24(3):249-54.                                                                                                                                                                               |
| 316. | Tawadrous    | 2020 | Tawadrous D, Detombe S, Thompson D, Columbus M, Van Aarsen K, Skoretz T. Reducing unnecessary testing in the emergency department: the case for INR and aPTT. <i>Canadian Journal of Emergency Medicine</i> . 2020 Mar 26:1-8.                                                                                                   |
| 317. | Tannenbaum   | 2014 | Tannenbaum C, Martin P, Tamblyn R, Benedetti A, Ahmed S. Reduction of inappropriate benzodiazepine prescriptions among older adults through direct patient education: the EMPOWER cluster randomized trial. <i>JAMA Internal Medicine</i> . 2014 Jun 1;174(6):890-8.                                                             |

| No.  | First Author   | Year | Full Citation or Source                                                                                                                                                                                                                                                                                                                                  |
|------|----------------|------|----------------------------------------------------------------------------------------------------------------------------------------------------------------------------------------------------------------------------------------------------------------------------------------------------------------------------------------------------------|
| 318. | TenHaaf        | 2017 | ten Haaf K, Tammemägi MC, Bondy SJ, van der Aalst CM, Gu S, McGregor SE, et al. Performance and cost-effectiveness of computed tomography lung cancer screening scenarios in a population-based setting: a microsimulation modeling analysis in Ontario, Canada. <i>PLoS Medicine</i> . 2017 Feb;14(2).                                                  |
| 319. | Thanh          | 2020 | Thanh NX, Dmytruk K, O'Connell P, Rogers E, Fillier D, MacRae JM, et al. Return on investment of the diabetes foot care clinical pathway implementation in Alberta, Canada. <i>Diabetes Res Clin Pract</i> . 2020 Jul;165:108241.                                                                                                                        |
| 320. | Tharmaratnam   | 2019 | Tharmaratnam T, Bouck Z, Sivaswamy A, Wijeyesundera HC, Chu C, Yin CX, et al. Low-value transthoracic echocardiography, healthcare utilization, and clinical outcomes in patients with coronary artery disease. <i>Circulation: Cardiovascular Quality and Outcomes</i> . 2019 Nov;12(11):e006123.                                                       |
| 321. | Theodoropoulos | 2012 | Theodoropoulos J, Dwyer T, Whelan D, Marks P, Hurtig M, Sharma P. Microfracture for knee chondral defects: a survey of surgical practice among Canadian orthopedic surgeons. <i>Knee Surgery, Sports Traumatology, Arthroscopy</i> . 2012 Dec 1;20(12):2430-7.                                                                                           |
| 322. | Tingley        | 2020 | Tingley K, Lamoureux M, Pugliese M, Geraghty MT, Kronick JB, Potter BK, et al. Evaluation of the quality of clinical data collection for a pan-Canadian cohort of children affected by inherited metabolic diseases: lessons learned from the Canadian Inherited Metabolic Diseases Research Network. <i>Orphanet J Rare Dis</i> . 2020 Apr 10;15(1):89. |
| 323. | Todd           | 2007 | Todd KH, Ducharme J, Choiniere M, Crandall CS, Fosnocht DE, Homel P, et al. Pain in the emergency department: results of the pain and emergency medicine initiative (PEMI) multicenter study. <i>The Journal of Pain</i> . 2007 Jun 1;8(6):460-6.                                                                                                        |
| 324. | Tran           | 2019 | Tran DT, Akpinar I, Mayers I, Makhinova T, Jacobs P. Temporal trends of pharmacologic therapies for patients with chronic obstructive pulmonary disease in Alberta, Canada. <i>International Journal of Chronic Obstructive Pulmonary Disease</i> . 2019;14:2245.                                                                                        |
| 325. | Turcotte       | 2020 | Turcotte LA, Daniel I, Hirdes JP. The post-acute delayed discharge risk scale: derivation and validation with Ontario alternate level of care patients in Ontario complex continuing care hospitals. <i>J Am Med Dir Assoc</i> . 2020 Apr;21(4):538-544.e1.                                                                                              |
| 326. | Turgeon        | 2020 | Turgeon RD, Koshman SL, Youngson E, Har B, Wilton SB, James MT, et al. Association of ticagrelor vs clopidogrel with major adverse coronary events in patients with acute coronary syndrome undergoing percutaneous coronary intervention. <i>JAMA Internal Medicine</i> . 2020 Mar 1;180(3):420-8.                                                      |

| No.  | First Author | Year | Full Citation or Source                                                                                                                                                                                                                                                                             |
|------|--------------|------|-----------------------------------------------------------------------------------------------------------------------------------------------------------------------------------------------------------------------------------------------------------------------------------------------------|
| 327. | Vanderby     | 2018 | Vanderby S, Badea A, Peña Sánchez JN, Kalra N, Babyn P. A day in the life of MRI: The variety and appropriateness of exams being performed in Canada. <i>Canadian Association of Radiologists' Journal</i> . 2018 May;69(2):151-61.                                                                 |
| 328. | vanDiepen    | 2018 | van Diepen S, Tran DT, Ezekowitz JA, Zygun DA, Katz JN, Lopes RD, et al. The high cost of critical care unit over-utilization for patients with NSTEMI ACS. <i>American Heart Journal</i> . 2018 Aug 1;202:84-8.                                                                                    |
| 329. | Voulgarelis  | 2018 | Voulgarelis S, Vitola B, Lerret SM, Hong JC, Scott JP. Perioperative anticoagulation practices for pediatric liver transplantation. <i>Pediatric Transplantation</i> . 2018 Jun;22(4):e13193.                                                                                                       |
| 330. | Wang         | 2013 | Wang TY, Egualé T, Tamblyn R. Guidelines adherence in the treatment of patients with newly diagnosed type 2 diabetes: a historical cohort comparing the use of metformin in Quebec pre and post-Canadian Diabetes Association guidelines. <i>BMC Health Services Research</i> . 2013 Dec;13(1):442. |
| 331. | Wei          | 2013 | Wei AC, Sandhu L, Devitt KS, Gagliardi AR, Kennedy ED, Urbach DR, et al. Practice patterns for the management of hepatic metastases from colorectal cancer: a mixed methods analysis. <i>Annals of Surgical Oncology</i> . 2013 May 1;20(5):1567-74.                                                |
| 332. | Wentlandt    | 2014 | Wentlandt K, Krzyzanowska MK, Swami N, Rodin G, Le LW, Sung L, et al. Referral practices of pediatric oncologists to specialized palliative care. <i>Supportive Care in Cancer</i> . 2014 Sep 1;22(9):2315-22.                                                                                      |
| 333. | Wilson       | 2016 | Wilson M, Mazowita G, Ignaszewski A, Levin A, Barber C, Thompson D, et al. Family physician access to specialist advice by telephone: Reduction in unnecessary specialist consultations and emergency department visits. <i>Canadian Family Physician</i> . 2016 Nov 1;62(11):e668-76.              |
| 334. | Wodchis      | 2012 | Wodchis WP, Corallo A, Ma X, White P, Pringle D, de Nobrega P, et al. Health outcomes for better information and care (HOBIC): acute care in Ontario. ICES investigative report. Toronto: Institute for Clinical Evaluative Sciences; 2012.                                                         |
| 335. | Wong         | 2015 | Wong J, Shah PS, Yoon EW, Yee W, Lee S, Dow K. Inotrope use among extremely preterm infants in Canadian neonatal intensive care units: variation and outcomes. <i>American Journal of Perinatology</i> . 2015 Jan;32(01):009-14.                                                                    |
| 336. | Wong         | 2017 | Wong J, Motulsky A, Abrahamowicz M, Egualé T, Buckeridge DL, Tamblyn R. Off-label indications for antidepressants in primary care: descriptive study of prescriptions from an indication based electronic prescribing system. <i>BMJ</i> . 2017 Feb 21;356:j603.                                    |

| No.  | First Author | Year | Full Citation or Source                                                                                                                                                                                                                                                                                                                                                       |
|------|--------------|------|-------------------------------------------------------------------------------------------------------------------------------------------------------------------------------------------------------------------------------------------------------------------------------------------------------------------------------------------------------------------------------|
| 337. | Walter       | 2020 | Walter G, Kalicinsky C, Warrington R, Miguel M, Reyes J, Rubin TS. Delivery of subcutaneous immunoglobulin by rapid "push" infusion for primary immunodeficiency patients in Manitoba: a retrospective review. <i>Allergy Asthma Clin Immunol.</i> 2020 May 13;16:34.                                                                                                         |
| 338. | Wood         | 2019 | Wood DA, Lauck SB, Cairns JA, Humphries KH, Cook R, Welsh R, et al. The Vancouver 3M (multidisciplinary, multimodality, but minimalist) clinical pathway facilitates safe next-day discharge home at low-, medium-, and high-volume transfemoral transcatheter aortic valve replacement centers: the 3M TAVR study. <i>JACC Cardiovasc Interv.</i> 2019 Mar 11;12(5):459-469. |
| 339. | Xu           | 2019 | Xu JY, Vena JE, Whelan HK, Robson PJ. Impact of adherence to cancer-specific prevention recommendations on subsequent risk of cancer in participants in Alberta's Tomorrow Project. <i>Public Health Nutr.</i> 2019 Feb;22(2):235-245.                                                                                                                                        |
| 340. | Young        | 2019 | Young TK, Chatwood S, Ng C, Young RW, Marchildon GP. The north is not all the same: comparing health system performance in 18 northern regions of Canada. <i>Int J Circumpolar Health.</i> 2019 Dec;78(1):1697474.                                                                                                                                                            |
| 341. | Yuan         | 2020 | Yuan Y, Vu K, Shen Y, Dickinson J, Winget M. Importance of quality in breast cancer screening practice - a natural experiment in Alberta, Canada. <i>BMJ Open.</i> 2020 Jan 6;10(1):e028766.                                                                                                                                                                                  |
| 342. | Zeiler       | 2016 | Zeiler FA, AlSubaie F, Zeiler K, Bernard F, Skrobik Y. Analgesia in neurocritical care: an international survey and practice audit. <i>Critical Care Medicine.</i> 2016 May 1;44(5):973-80.                                                                                                                                                                                   |
| 343. | Zwarenstein  | 2016 | Zwarenstein M, Grimshaw JM, Pesseau J, Francis JJ, Godin G, Johnston M, et al. Printed educational messages fail to increase use of thiazides as first-line medication for hypertension in primary care: A cluster randomized controlled trial. <i>Implementation Science.</i> 2015 Dec;11(1):124.                                                                            |

### Cannot find (n= 9)

| No. | First Author | Year | Full Citation or Source                                                                                           |
|-----|--------------|------|-------------------------------------------------------------------------------------------------------------------|
| 1.  | N/A          | N/A  | 2017 Report on diabetes in British Columbia [British Columbia]                                                    |
| 2.  | N/A          | N/A  | The Alberta provincial stroke strategy: Improving stroke care across Alberta. Interim evaluation report [Alberta] |

|    |     |     |                                                                                                                  |
|----|-----|-----|------------------------------------------------------------------------------------------------------------------|
| 3. | N/A | N/A | 2016 Report on diabetes in Newfoundland and Labrador [Newfoundland and Labrador]                                 |
| 4. | N/A | N/A | 2016 Report on diabetes in Manitoba [Manitoba]                                                                   |
| 5. | N/A | N/A | Canadian Diabetes Association: 2016 report on diabetes in Ontario [Ontario]                                      |
| 6. | N/A | N/A | Excellent care for all [Ontario]                                                                                 |
| 7. | N/A | N/A | Report on performance indicators in mental health [Quebec]                                                       |
| 8. | N/A | N/A | Measuring and reporting on health system performance in Canada: Opportunities for improvement [Federal/national] |
| 9. | N/A | N/A | 2016 Report on diabetes on Prince Edward Island [Prince Edward Island]                                           |
